# Supplementary material for: State-to-State Variation in Opioid Dispensing Changes Following the Release of the 2016 CDC Guideline for Prescribing Opioids for Chronic Pain
Source: PubMed Central journal article supplement (PMC10495870; doi:10.1001/jamanetworkopen.2023.32507), 2023-09-11

## Supplemental Online Content

Lyu X, Guy G, Baldwin G, Losby JL, Bohnert ASB, Goldstick JE. State-to-state variation in opioid dispensing changes following the release of the 2016 CDC Guideline for Prescribing Opioids for Chronic Pain. *JAMA Netw Open*. 2023;6(9):e2332507. doi:10.1001/jamanetworkopen.2023.32507

**eTable 1.** Description of Product Name, Generic Drug Name, and Whether or Not the Drugs Are Long-Acting for Each Drug Identified in the IQVIA Data Set That Contributed to the Overall Dispensing Totals

**eTable 2.** Changes in Slope (Pre- vs. Post-Guideline) by Census Region for Each of the Four Primary Outcomes

**eFigure 1.** Trends in the Overall Dispensing Rate From 2012 Through 2018, With Linear Regression Lines Showing the Pre- and Post-Guideline Slopes Superimposed

**eFigure 2.** Trends in the Long-Acting Dispensing Rate From 2012 Through 2018, With Linear Regression Lines Showing the Pre- and Post-Guideline Slopes Superimposed

**eFigure 3.** Trends in the High-Dose ( $\geq 90$  MME/Day) Dispensing Rate From 2012 Through 2018, With Linear Regression Lines Showing the Pre- and Post-Guideline Slopes Superimposed

**eFigure 4.** Trends in the Per Capita MME Dispensing From 2012 Through 2018, With Linear Regression Lines Showing the Pre- and Post-Guideline Slopes Superimposed

**eFigure 5.** Association Between Baseline Dispensing Levels and the Slope Change (Pre- vs Post-Guideline) at the State-Level for Each of the Four Primary Outcomes

This supplemental material has been provided by the authors to give readers additional information about their work.

**eTable 1.** Description of product name, generic drug name, and whether or not the drugs are long-acting for each drug identified in the IQVIA data set that contributed to the overall dispensing totals

| <b>PRODUCT NAME</b>                                | <b>Generic Drug Name</b>                         | <b>Drug</b>    | <b>LongShortActing</b> |
|----------------------------------------------------|--------------------------------------------------|----------------|------------------------|
| AVINZA                                             | Morphine Sulfate                                 | Morphine LA    | LA                     |
| METHADONE HCL INTENSOL                             | Methadone Hydrochloride                          | Methadone      | LA                     |
| METHADONE HCL                                      | Methadone Hydrochloride                          | Methadone      | LA                     |
| ULTRAM ER                                          | Tramadol Hydrochloride                           | Tramadol       | LA                     |
| MORPHINE SULFATE                                   | Morphine Sulfate                                 | Morphine LA    | LA                     |
| FENTANYL                                           | Fentanyl                                         | Fentanyl LA    | LA                     |
| METHADOSE                                          | Methadone Hydrochloride                          | Methadone      | LA                     |
| METHADONE HYDROCHLORIDE                            | Methadone Hydrochloride                          | Methadone      | LA                     |
| FENTANYL TRANSDERMAL SYSTEM                        | Fentanyl                                         | Fentanyl LA    | LA                     |
| TRAMADOL HYDROCHLORIDE                             | Tramadol Hydrochloride                           | Tramadol       | LA                     |
| EXALGO                                             | Hydromorphone Hydrochloride                      | Hydromorphone  | LA                     |
| KADIAN                                             | Morphine Sulfate                                 | Morphine LA    | LA                     |
| DURAGESIC                                          | Fentanyl                                         | Fentanyl LA    | LA                     |
| NUCYNTA ER                                         | Tapentadol Hydrochloride                         | Tapentadol     | LA                     |
| OXYCONTIN                                          | Oxycodone Hydrochloride                          | Oxycodone LA   | LA                     |
| MS CONTIN                                          | Morphine Sulfate                                 | Morphine LA    | LA                     |
| RYZOLT                                             | Tramadol Hydrochloride                           | Tramadol       | LA                     |
| BUTRANS                                            | Buprenorphine                                    | Buprenorphine  | LA                     |
| OPANA ER                                           | Oxymorphone Hydrochloride                        | Oxymorphone LA | LA                     |
| ACETAMINOPHEN W/CODEINE                            | Acetaminophen/Codeine Phosphate                  | Codeine        | SA                     |
| ACETAMINOPHEN/CODEINE                              | Acetaminophen/Codeine Phosphate                  | Codeine        | SA                     |
| TRAMADOL HCL                                       | Tramadol Hydrochloride                           | Tramadol       | SA                     |
| ACETAMINOPHEN AND CODEINE PHOSPHATE                | Acetaminophen/Codeine Phosphate                  | Codeine        | SA                     |
| BUTALBITAL-ACETAMINOPHEN-CAFFEINE-CODEINE PHOSPHAT | APAP/Butalbital/Caff/Codeine Phos                | Codeine        | SA                     |
| BUTORPHANOL TARTRATE                               | Butorphanol Tartrate                             | Butorphanol    | SA                     |
| BUTALBITAL-ASPIRIN-CAFFEINE-CODEINE                | Aspirin/Butalbital/Caffeine/Codeine Phosphate    | Codeine        | SA                     |
| PENTAZOCINE HCL-NALOXONE HCL                       | Naloxone Hydrochloride/Pentazocine Hydrochloride | Pentazocine    | SA                     |
| PENTAZOCINE HCL-ACETAMINOPHEN                      | Acetaminophen/Pentazocine Hydrochloride          | Pentazocine    | SA                     |
| BUTALBITAL-ACETAMINOPHEN-CAFFEINE-CODEINE          | APAP/Butalbital/Caff/Codeine Phos                | Codeine        | SA                     |
| TRAMADOL HYDROCHLORIDE                             | Tramadol Hydrochloride                           | Tramadol       | SA                     |
| TYLENOL WITH CODEINE NO. 3                         | Acetaminophen/Codeine Phosphate                  | Codeine        | SA                     |
| TYLENOL WITH CODEINE NO. 4                         | Acetaminophen/Codeine Phosphate                  | Codeine        | SA                     |
| ULTRAM                                             | Tramadol Hydrochloride                           | Tramadol       | SA                     |
| ASCOMP W/CODEINE                                   | Aspirin/Butalbital/Caffeine/Codeine Phosphate    | Codeine        | SA                     |
| RYBIX ODT                                          | Tramadol Hydrochloride                           | Tramadol       | SA                     |
| ABSTRAL                                            | Fentanyl Citrate                                 | Fentanyl SA    | SA                     |

|                                      |                                             |                   |    |
|--------------------------------------|---------------------------------------------|-------------------|----|
| ACETAMINOPHEN-HYDROCODONE BITARTRATE | Acetaminophen/Hydrocodone Bitartrate        | Hydrocodone       | SA |
| ACETAMINOPHEN-HYDROCODONE BITARTRATE | Acetaminophen/Hydrocodone Bitartr           | Hydrocodone       | SA |
| ACETAMINOPHEN-OXYCODONE              | Acetaminophen/Oxycodone Hydrochloride       | Oxycodone SA      | SA |
| HYDROMORPHONE HCL                    | Hydromorphone Hydrochloride                 | Hydromorpho<br>ne | SA |
| HYDROMORPHONE HCL/SODIUM CHLORIDE    | Hydromorphone Hydrochloride/Sodium Chloride | Hydromorpho<br>ne | SA |
| HYDROMORPHONE HCL-SODIUM CHLORIDE    | Hydromorphone Hydrochloride/Sodium Chloride | Hydromorpho<br>ne | SA |
| HYDROMORPHONE HYDROCHLORIDE          | Hydromorphone Hydrochloride                 | Hydromorpho<br>ne | SA |
| MORPHINE SULFATE                     | Morphine Sulfate                            | Morphine SA       | SA |
| CODEINE SULFATE                      | Codeine Sulfate                             | Codeine           | SA |
| OXYMORPHONE HYDROCHLORIDE            | Oxymorphone Hydrochloride                   | Oxymorphone<br>SA | SA |
| OXYCODONE-ACETAMINOPHEN              | Acetaminophen/Oxycodone Hydrochloride       | Oxycodone<br>SA   | SA |
| ROXICET                              | Acetaminophen/Oxycodone Hydrochloride       | Oxycodone<br>SA   | SA |
| MEPERIDINE HCL                       | Meperidine Hydrochloride                    | Meperidine        | SA |
| VICODIN                              | Acetaminophen/Hydrocodone Bitartrate        | Hydrocodone       | SA |
| VICODIN ES                           | Acetaminophen/Hydrocodone Bitartrate        | Hydrocodone       | SA |
| HYDROCODONE BITARTRATE-IBUPROFEN     | Hydrocodone Bitartrate/Ibuprofen            | Hydrocodone       | SA |
| ORAL TRANSMUCOSAL FENTANYL CITRATE   | Fentanyl Citrate                            | Fentanyl SA       | SA |
| OXYCODONE HYDROCHLORIDE              | Oxycodone Hydrochloride                     | Oxycodone<br>SA   | SA |
| OXYCODONE HCL-IBUPROFEN              | Ibuprofen/Oxycodone Hydrochloride           | Oxycodone<br>SA   | SA |
| OXYCODONE HCL-ASPIRIN                | Aspirin/Oxycodone Hydrochloride             | Oxycodone<br>SA   | SA |
| OXYCODONE AND ACETAMINOPHEN          | Acetaminophen/Oxycodone Hydrochloride       | Oxycodone<br>SA   | SA |
| HYDROCODONE BITARTRATE-ACETAMINOPHEN | Acetaminophen/Hydrocodone Bitartrate        | Hydrocodone       | SA |
| OXYCODONE HCL-ACETAMINOPHEN          | Acetaminophen/Oxycodone Hydrochloride       | Oxycodone<br>SA   | SA |
| OXYCODONE HCL                        | Oxycodone Hydrochloride                     | Oxycodone<br>SA   | SA |
| FENTANYL CITRATE                     | Fentanyl Citrate                            | Fentanyl SA       | SA |
| OXYCODONE-ASPIRIN                    | ASA/Oxycodone HCl/Oxycodone Terephthalate   | Oxycodone<br>SA   | SA |
| MEPERITAB                            | Meperidine Hydrochloride                    | Meperidine        | SA |
| TYLOX                                | Acetaminophen/Oxycodone Hydrochloride       | Oxycodone<br>SA   | SA |
| NUCYNTA                              | Tapentadol Hydrochloride                    | Tapentadol        | SA |
| LORTAB 5/500                         | Acetaminophen/Hydrocodone Bitartrate        | Hydrocodone       | SA |
| LORTAB 10/500                        | Acetaminophen/Hydrocodone Bitartrate        | Hydrocodone       | SA |
| NORCO                                | Acetaminophen/Hydrocodone Bitartrate        | Hydrocodone       | SA |

|                                             |                                               |                |    |
|---------------------------------------------|-----------------------------------------------|----------------|----|
| DILAUDID                                    | Hydromorphone Hydrochloride                   | Hydromorphone  | SA |
| ENDODAN                                     | Aspirin/Oxycodone Hydrochloride               | Oxycodone SA   | SA |
| ENDOCET                                     | Acetaminophen/Oxycodone Hydrochloride         | Oxycodone SA   | SA |
| DURAMORPH                                   | Morphine Sulfate                              | Morphine SA    | SA |
| FENTORA                                     | Fentanyl Citrate                              | Fentanyl SA    | SA |
| PERCODAN                                    | Aspirin/Oxycodone Hydrochloride               | Oxycodone SA   | SA |
| OPANA                                       | Oxymorphone Hydrochloride                     | Oxymorphone SA | SA |
| PERCOCET                                    | Acetaminophen/Oxycodone Hydrochloride         | Oxycodone SA   | SA |
| ZYDONE                                      | Acetaminophen/Hydrocodone Bitartrate          | Hydrocodone    | SA |
| REPREXAIN                                   | Hydrocodone Bitartrate/Ibuprofen              | Hydrocodone    | SA |
| ROXICODONE                                  | Oxycodone Hydrochloride                       | Oxycodone SA   | SA |
| OXYCODONE HYDROCHLORIDE                     | Oxycodone Hydrochloride                       | Oxycodone LA   | LA |
| HYDROMORPHONE HYDROCHLORIDE-SODIUM CHLORIDE | Hydromorphone Hydrochloride/Sodium Chloride   | Hydromorphone  | SA |
| HYDROSTAT IR                                | Hydromorphone Hydrochloride                   | Hydromorphone  | SA |
| HY-PHEN                                     | Acetaminophen/Hydrocodone Bitartrate          | Hydrocodone    | SA |
| IBUDONE                                     | Hydrocodone Bitartrate/Ibuprofen              | Hydrocodone    | SA |
| INFUMORPH                                   | Morphine Sulfate                              | Morphine SA    | SA |
| INFUMORPH 200                               | Morphine Sulfate                              | Morphine SA    | SA |
| INFUMORPH 500                               | Morphine Sulfate                              | Morphine SA    | SA |
| LAZANDA                                     | Fentanyl Citrate                              | Fentanyl SA    | SA |
| LIQUICET                                    | Acetaminophen/Hydrocodone Bitartrate          | Hydrocodone    | SA |
| LORCET                                      | Acetaminophen/Hydrocodone Bitartrate          | Hydrocodone    | SA |
| LORCET                                      | Acetaminophen/Hydrocodone Bitartrate          | Hydrocodone    | SA |
| LORCET 10/650                               | Acetaminophen/Hydrocodone Bitartrate          | Hydrocodone    | SA |
| VICODIN HP                                  | Acetaminophen/Hydrocodone Bitartrate          | Hydrocodone    | SA |
| CO-GESIC                                    | Acetaminophen/Hydrocodone Bitartrate          | Hydrocodone    | SA |
| OXYMORPHONE HYDROCHLORIDE                   | Oxymorphone Hydrochloride                     | Oxymorphone LA | LA |
| FIORICET WITH CODEINE                       | APAP/Butalbital/Caff/Codeine Phos             | Codeine        | SA |
| SYNALGOS-DC                                 | Aspirin/Caffeine/Dihydrocodeine Bitartrate    | Dihydrocodeine | SA |
| FIORINAL W/CODEINE                          | Aspirin/Butalbital/Caffeine/Codeine Phosphate | Codeine        | SA |
| ACTIQ                                       | Fentanyl Citrate                              | Fentanyl SA    | SA |
| LORCET HD                                   | Acetaminophen/Hydrocodone Bitartrate          | Hydrocodone    | SA |
| LORCET HD                                   | Acetaminophen/Hydrocodone Bitartrate          | Hydrocodone    | SA |
| LORCET PLUS                                 | Acetaminophen/Hydrocodone Bitartrate          | Hydrocodone    | SA |
| LORCET PLUS                                 | Acetaminophen/Hydrocodone Bitartrate          | Hydrocodone    | SA |
| LORCET-HD                                   | Acetaminophen/Hydrocodone Bitartrate          | Hydrocodone    | SA |

|                                             |                                                  |                |    |
|---------------------------------------------|--------------------------------------------------|----------------|----|
| LORTAB                                      | Acetaminophen/Hydrocodone Bitartrate             | Hydrocodone    | SA |
| LORTAB 10/325                               | Acetaminophen/Hydrocodone Bitartrate             | Hydrocodone    | SA |
| LORTAB 2.5/500                              | Acetaminophen/Hydrocodone Bitartrate             | Hydrocodone    | SA |
| LORTAB 5/325                                | Acetaminophen/Hydrocodone Bitartrate             | Hydrocodone    | SA |
| LORTAB 7                                    | Acetaminophen/Hydrocodone Bitartrate             | Hydrocodone    | SA |
| LORTAB 7.5/325                              | Acetaminophen/Hydrocodone Bitartrate             | Hydrocodone    | SA |
| LORTAB 7.5/500                              | Acetaminophen/Hydrocodone Bitartrate             | Hydrocodone    | SA |
| LORTAB ASA                                  | Aspirin/Hydrocodone Bitartrate                   | Hydrocodone    | SA |
| LORTAB LIQUID                               | Acetaminophen/Hydrocodone Bitartrate             | Hydrocodone    | SA |
| MAGNACET                                    | Acetaminophen/Oxycodone Hydrochloride            | Oxycodone SA   | SA |
| MARGESIC-H                                  | Acetaminophen/Hydrocodone Bitartrate             | Hydrocodone    | SA |
| MAXIDONE                                    | Acetaminophen/Hydrocodone Bitartrate             | Hydrocodone    | SA |
| MEDIPAIN 5                                  | Acetaminophen/Hydrocodone Bitartrate             | Hydrocodone    | SA |
| MEGAGESIC                                   | Acetaminophen/Hydrocodone Bitartrate             | Hydrocodone    | SA |
| MEGAMOR                                     | Acetaminophen/Hydrocodone Bitartrate             | Hydrocodone    | SA |
| MEPEREDINE                                  | Meperidine Hydrochloride                         | Meperidine     | SA |
| MEPERIDINE                                  | Meperidine Hydrochloride                         | Meperidine     | SA |
| MEPERIDINE HYDROCHLORIDE                    | Meperidine Hydrochloride                         | Meperidine     | SA |
| METHADONE HCL CONCENTRATE                   | Methadone Hydrochloride                          | Methadone      | LA |
| MORPHINE                                    | Morphine Sulfate                                 | Morphine SA    | SA |
| MORPHINE SULF                               | Morphine Sulfate                                 | Morphine SA    | SA |
| VICOPROFEN                                  | Hydrocodone Bitartrate/Ibuprofen                 | Hydrocodone    | SA |
| ANEXSIA                                     | Acetaminophen/Hydrocodone Bitartrate             | Hydrocodone    | SA |
| ACETAMINOPHEN, CAFFEINE, AND DIHYDROCODEINE | Acetaminophen/Caffeine/Dihydrocodeine Bitartrate | Dihydrocodeine | SA |
| TREZIX                                      | Acetaminophen/Caffeine/Dihydrocodeine Bitartrate | Dihydrocodeine | SA |
| LEVORPHANOL TARTRATE                        | Levorphanol Tartrate                             | Levorphanol    | LA |
| CARISOPRODOL/ASPIRIN/CODEINE                | Aspirin/Carisoprodol/Codeine Phosphate           | Codeine        | SA |
| SUBSYS                                      | Fentanyl                                         | Fentanyl SA    | SA |
| STAGESIC                                    | Acetaminophen/Hydrocodone Bitartrate             | Hydrocodone    | SA |
| XODOL 7.5/300                               | Acetaminophen/Hydrocodone Bitartrate             | Hydrocodone    | SA |
| XOLOX                                       | Acetaminophen/Oxycodone Hydrochloride            | Oxycodone SA   | SA |
| XODOL                                       | Acetaminophen/Hydrocodone Bitartrate             | Hydrocodone    | SA |
| XODOL 5/300                                 | Acetaminophen/Hydrocodone Bitartrate             | Hydrocodone    | SA |
| DOLOPHINE HCL                               | Methadone Hydrochloride                          | Methadone      | LA |
| CONZIP                                      | Tramadol Hydrochloride                           | Tramadol       | LA |

|                                      |                                          |                |    |
|--------------------------------------|------------------------------------------|----------------|----|
| MORPHINE SULFATE IMMEDIATE RELEASE   | Morphine Sulfate                         | Morphine SA    | SA |
| MORPHINE SULFATE IR                  | Morphine Sulfate                         | Morphine SA    | SA |
| MS/L                                 | Morphine Sulfate                         | Morphine SA    | SA |
| MS/L CONCENTRATE                     | Morphine Sulfate                         | Morphine SA    | SA |
| MS/S                                 | Morphine Sulfate                         | Morphine SA    | SA |
| MSIR                                 | Morphine Sulfate                         | Morphine SA    | SA |
| NARVOX                               | Acetaminophen/Oxycodone Hydrochloride    | Oxycodone SA   | SA |
| NORCET                               | Acetaminophen/Hydrocodone Bitartrate     | Hydrocodone    | SA |
| NORCET-7.5                           | Acetaminophen/Hydrocodone Bitartrate     | Hydrocodone    | SA |
| PRIMLEV                              | Acetaminophen/Oxycodone Hydrochloride    | Oxycodone SA   | SA |
| NOVAPLUS FENTANYL                    | Fentanyl                                 | Fentanyl LA    | LA |
| NUMORPHAN HCL                        | Oxymorphone Hydrochloride                | Oxymorphone SA | SA |
| OMS                                  | Morphine Sulfate                         | Morphine SA    | SA |
| ONCET                                | Acetaminophen/Hydrocodone Bitartrate     | Hydrocodone    | SA |
| ONSOLIS                              | Fentanyl Citrate                         | Fentanyl SA    | SA |
| OXECTA                               | Oxycodone Hydrochloride                  | Oxycodone SA   | SA |
| OXY IR                               | Oxycodone Hydrochloride                  | Oxycodone SA   | SA |
| OXYCET                               | Acetaminophen/Oxycodone Hydrochloride    | Oxycodone SA   | SA |
| ZAMICET                              | Acetaminophen/Hydrocodone Bitartrate     | Hydrocodone    | SA |
| ACETAMINOPHEN/CODEINE #2             | Acetaminophen/Codeine Phosphate          | Codeine        | SA |
| ACETAMINOPHEN/CODEINE #3             | Acetaminophen/Codeine Phosphate          | Codeine        | SA |
| ACETAMINOPHEN/CODEINE #4             | Acetaminophen/Codeine Phosphate          | Codeine        | SA |
| ACETAMINOPHEN/CODEINE PHOSPHATE      | Acetaminophen/Codeine Phosphate          | Codeine        | SA |
| ACETAMINOPHEN/PENTAZOCINE HCL        | Acetaminophen/Pentazocine Hydrochloride  | Pentazocine    | SA |
| ACETAMINOPHEN/PROPOXYPHENE           | Acetaminophen/Propoxyphene Hydrochloride | Propoxyphene   | SA |
| ACETAMINOPHEN/PROPOXYPHENE HCL       | Acetaminophen/Propoxyphene Hydrochloride | Propoxyphene   | SA |
| ACETAMINOPHEN/PROPOXYPHENE NAPSYLATE | Acetaminophen/Propoxyphene Napsylate     | Propoxyphene   | SA |
| ACETAMINOPHEN-CODEINE PHOSPHATE      | Acetaminophen/Codeine Phosphate          | Codeine        | SA |
| ACETATAB                             | Acetaminophen/Codeine Phosphate          | Codeine        | SA |
| APAP AND CODEINE                     | Acetaminophen/Codeine Phosphate          | Codeine        | SA |
| APAP W/ CODEINE                      | Acetaminophen/Codeine Phosphate          | Codeine        | SA |
| OXYCODONE HCL AND ACETAMINOPHEN      | Acetaminophen/Oxycodone Hydrochloride    | Oxycodone SA   | SA |
| APAP W/CODEINE                       | Acetaminophen/Codeine Phosphate          | Codeine        | SA |
| APAP W/PROPOXYPHENE NAPSYLATE        | Acetaminophen/Propoxyphene Napsylate     | Propoxyphene   | SA |
| DEPODUR                              | Morphine Sulfate Liposome                | Morphine LA    | LA |
| DISKETS DISPERSIBLE                  | Methadone Hydrochloride                  | Methadone      | LA |
| APAP/BUTALBITAL/CAFFEINE/CODEINE     | APAP/Butalbital/Caff/Codeine Phos        | Codeine        | SA |

|                                               |                                           |              |    |
|-----------------------------------------------|-------------------------------------------|--------------|----|
| APAP/CODEINE                                  | Acetaminophen/Codeine Phosphate           | Codeine      | SA |
| ENDODAN                                       | ASA/Oxycodone HCl/Oxycodone Terephthalate | Oxycodone SA | SA |
| OXYCODONE HCL-ACETAMINOPHEN                   | Acetaminophen/Oxycodone Hydrochloride     | Oxycodone SA | SA |
| ORAMORPH SR                                   | Morphine Sulfate                          | Morphine LA  | LA |
| A.P.C. W/CODEINE                              | A.P.C. W/Codeine                          | Codeine      | SA |
| APAP/PROPOXYPHENE                             | Acetaminophen/Propoxyphene Hydrochloride  | Propoxyphene | SA |
| APAP/PROPOXYPHENE                             | Acetaminophen/Propoxyphene Napsylate      | Propoxyphene | SA |
| APAP/PROPOXYPHENE NAPSYLATE                   | Acetaminophen/Propoxyphene Napsylate      | Propoxyphene | SA |
| OXYCODONE HCL-OXYCODONE TEREPHTHALATE-ASPIRIN | ASA/Oxycodone HCl/Oxycodone Terephthalate | Oxycodone SA | SA |
| APAP/HYDROCODONE BITARTRATE                   | Acetaminophen/Hydrocodone Bitartrate      | Hydrocodone  | SA |
| APAP/PROPOXYPHENE HCL                         | Acetaminophen/Propoxyphene Hydrochloride  | Propoxyphene | SA |
| OXYCODONE W/APAP                              | Acetaminophen/Oxycodone Hydrochloride     | Oxycodone SA | SA |
| OXYCODONE W/ASPIRIN                           | ASA/Oxycodone HCl/Oxycodone Terephthalate | Oxycodone SA | SA |
| EMBEDA                                        | Morphine Sulfate/Naltrexone Hydrochloride | Morphine LA  | LA |
| OXYCODONE HCL                                 | Oxycodone Hydrochloride                   | Oxycodone LA | LA |
| APAP/PROPOXYPHENE NAPSYLATE                   | Propoxyphene Napsylate                    | Propoxyphene | SA |
| OXYCODONE-APAP                                | Acetaminophen/Oxycodone Hydrochloride     | Oxycodone SA | SA |
| OXYFAST                                       | Oxycodone Hydrochloride                   | Oxycodone SA | SA |
| PANACET 5/500                                 | Acetaminophen/Hydrocodone Bitartrate      | Hydrocodone  | SA |
| PANASAL 5/500                                 | Aspirin/Hydrocodone Bitartrate            | Hydrocodone  | SA |
| PANLOR                                        | Acetaminophen/Hydrocodone Bitartrate      | Hydrocodone  | SA |
| PERCODAN                                      | ASA/Oxycodone HCl/Oxycodone Terephthalate | Oxycodone SA | SA |
| PERCODAN DEMI                                 | ASA/Oxycodone HCl/Oxycodone Terephthalate | Oxycodone SA | SA |
| PERCODAN-DEMI                                 | ASA/Oxycodone HCl/Oxycodone Terephthalate | Oxycodone SA | SA |
| PERCOLONE                                     | Oxycodone Hydrochloride                   | Oxycodone SA | SA |
| PERLOXX                                       | Acetaminophen/Oxycodone Hydrochloride     | Oxycodone SA | SA |
| POLYGESIC                                     | Acetaminophen/Hydrocodone Bitartrate      | Hydrocodone  | SA |
| PRIMALEV                                      | Acetaminophen/Oxycodone Hydrochloride     | Oxycodone SA | SA |
| PRIMLEV                                       | Acetaminophen/Oxycodone Hydrochloride     | Oxycodone SA | SA |
| PROCET                                        | Acetaminophen/Hydrocodone Bitartrate      | Hydrocodone  | SA |
| PROPAIN HC                                    | Acetaminophen/Hydrocodone Bitartrate      | Hydrocodone  | SA |
| RESCUDOSE                                     | Morphine Sulfate                          | Morphine SA  | SA |
| RMS                                           | Morphine Sulfate                          | Morphine SA  | SA |

|                                                  |                                               |                |    |
|--------------------------------------------------|-----------------------------------------------|----------------|----|
| RO-CODONE                                        | Acetaminophen/Hydrocodone Bitartrate          | Hydrocodone    | SA |
| ROGESIC #3                                       | Acetaminophen/Hydrocodone Bitartrate          | Hydrocodone    | SA |
| ROXANOL                                          | Morphine Sulfate                              | Morphine SA    | SA |
| ROXANOL UD                                       | Morphine Sulfate                              | Morphine SA    | SA |
| ROXANOL-T                                        | Morphine Sulfate                              | Morphine SA    | SA |
| ROXICODONE INTENSOL                              | Oxycodone Hydrochloride                       | Oxycodone SA   | SA |
| ROXIPRIN                                         | ASA/Oxycodone HCl/Oxycodone Terephthalate     | Oxycodone SA   | SA |
| SENEFEN III                                      | Acetaminophen/Hydrocodone Bitartrate          | Hydrocodone    | SA |
| SK-OXYCODONE W/APAP                              | Acetaminophen/Oxycodone Hydrochloride         | Oxycodone SA   | SA |
| SK-OXYCODONE W/ASPIRIN                           | ASA/Oxycodone HCl/Oxycodone Terephthalate     | Oxycodone SA   | SA |
| STAGESIC-10                                      | Acetaminophen/Hydrocodone Bitartrate          | Hydrocodone    | SA |
| EMBEDA                                           | Morphine Sulfate/Naltrexon                    | Morphine LA    | LA |
| CAPITAL W/CODEINE                                | Acetaminophen/Codeine Phosphate               | Codeine        | SA |
| T-GESIC                                          | Acetaminophen/Hydrocodone Bitartrate          | Hydrocodone    | SA |
| T-GESIC FORTE                                    | Acetaminophen/Hydrocodone Bitartrate          | Hydrocodone    | SA |
| UGESIC                                           | Acetaminophen/Hydrocodone Bitartrate          | Hydrocodone    | SA |
| VANACET                                          | Acetaminophen/Hydrocodone Bitartrate          | Hydrocodone    | SA |
| VAPOCET                                          | Acetaminophen/Hydrocodone Bitartrate          | Hydrocodone    | SA |
| VENDONE                                          | Acetaminophen/Hydrocodone Bitartrate          | Hydrocodone    | SA |
| VERDROCET                                        | Acetaminophen/Hydrocodone Bitartrate          | Hydrocodone    | SA |
| XYLON 10                                         | Hydrocodone Bitartrate/Ibu                    | Hydrocodone    | SA |
| APAP/PROPPOXYPHENE                               | Acetaminophen/Propoxyphene Hydrochloride      | Propoxyphene   | SA |
| APAP/PROPPOXYPHENE NAPSYLATE                     | Acetaminophen/Propoxyphene Napsylate          | Propoxyphene   | SA |
| ASCRIPITIN W/CODEINE                             | Aspirin (Buffered)/Codeine Phosphate          | Codeine        | SA |
| ASPIRIN & CAFFEINE W/PROPOXYPHENE                | Aspirin/Caffeine/Propoxyphene Hydrochloride   | Propoxyphene   | SA |
| ALLAY                                            | Acetaminophen/Hydrocodone Bitartrate          | Hydrocodone    | SA |
| ASPIRIN W/CODEINE                                | Aspirin/Codeine Phosphate                     | Codeine        | SA |
| ASPIRIN, CAFFEINE, AND DIHYDROCODEINE BITARTRATE | Aspirin/Caffeine/Dihydrocodeine Bitartrate    | Dihydrocodeine | SA |
| ASPIRIN/BUTALBITAL/CAFFEINE/CODEINE              | Aspirin/Butalbital/Caffeine/Codeine Phosphate | Codeine        | SA |
| ASPIRIN/CAFFEINE/PROPOXYPHENE                    | Aspirin/Caffeine/Propoxyphene Hydrochloride   | Propoxyphene   | SA |
| ASPIRIN/CAFFEINE/PROPOXYPHENE HYDROCHLORIDE      | Aspirin/Caffeine/Propoxyphene Hydrochloride   | Propoxyphene   | SA |
| ASPIRIN/CODEINE                                  | Aspirin/Codeine Phosphate                     | Codeine        | SA |
| B-A-C #3                                         | Aspirin/Butalbital/Caffeine/Codeine Phosphate | Codeine        | SA |



|                                       |                                                  |                |    |
|---------------------------------------|--------------------------------------------------|----------------|----|
| BALACET 325                           | Acetaminophen/Propoxyphene Napsylate             | Propoxyphene   | SA |
| BEXOPHENE                             | Aspirin/Caffeine/Propoxyphene Hydrochloride      | Propoxyphene   | SA |
| BUFFERIN W/CODEINE                    | Aspirin (Buffered)/Codeine Phosphate             | Codeine        | SA |
| BUT/APAP/CAFF/COD                     | APAP/Butalbital/Caff/Codeine Phos                | Codeine        | SA |
| BUTAL/APAP/CAFF/COD                   | APAP/Butalbital/Caff/Codeine Phos                | Codeine        | SA |
| BUTALBITAL COMPOUND W/CODEINE         | Aspirin/Butalbital/Caffeine/Codeine Phosphate    | Codeine        | SA |
| BUTALBITAL COMPOUND/CODEINE           | Aspirin/Butalbital/Caffeine/Codeine Phosphate    | Codeine        | SA |
| BUTALBITAL/APAP/CAFF/COD              | APAP/Butalbital/Caff/Codeine Phos                | Codeine        | SA |
| BUTALBITAL/APAP/CAFFEINE/CODEINE      | APAP/Butalbital/Caff/Codeine Phos                | Codeine        | SA |
| BUTALBITAL/ASPIRIN/CAFFEINE W/CODEINE | Aspirin/Butalbital/Caffeine/Codeine Phosphate    | Codeine        | SA |
| BUTALBITAL/ASPIRIN/CAFFEINE/CODEINE   | Aspirin/Butalbital/Caffeine/Codeine Phosphate    | Codeine        | SA |
| ALOR 5/500                            | Aspirin/Hydrocodone Bitartrate                   | Hydrocodone    | SA |
| AMACODONE                             | Acetaminophen/Hydrocodone Bitartrate             | Hydrocodone    | SA |
| BUTORPHANOL                           | Butorphanol Tartrate                             | Butorphanol    | SA |
| COASTALDYNE                           | Acetaminophen/Codeine Phosphate                  | Codeine        | SA |
| COCET                                 | Acetaminophen/Codeine Phosphate                  | Codeine        | SA |
| COCET PLUS                            | Acetaminophen/Codeine Phosphate                  | Codeine        | SA |
| CODAPHEN                              | Acetaminophen/Codeine Phosphate                  | Codeine        | SA |
| COTANAL-65                            | Propoxyphene Hydrochloride                       | Propoxyphene   | SA |
| DARVOCET A500                         | Acetaminophen/Propoxyphene Napsylate             | Propoxyphene   | SA |
| DARVOCET-N 100                        | Acetaminophen/Propoxyphene Napsylate             | Propoxyphene   | SA |
| DARVOCET-N 50                         | Acetaminophen/Propoxyphene Napsylate             | Propoxyphene   | SA |
| DARVON                                | Propoxyphene Hydrochloride                       | Propoxyphene   | SA |
| DARVON COMPOUND                       | Aspirin/Caffeine/Propoxyphene Hydrochloride      | Propoxyphene   | SA |
| DARVON COMPOUND 32                    | Aspirin/Caffeine/Propoxyphene Hydrochloride      | Propoxyphene   | SA |
| DARVON COMPOUND-65                    | Aspirin/Caffeine/Propoxyphene Hydrochloride      | Propoxyphene   | SA |
| DARVON-N                              | Propoxyphene Napsylate                           | Propoxyphene   | SA |
| DHC PLUS                              | Acetaminophen/Caffeine/Dihydrocodeine Bitartrate | Dihydrocodeine | SA |
| DOLENE                                | Propoxyphene Hydrochloride                       | Propoxyphene   | SA |
| DOLENE AP-65                          | Acetaminophen/Propoxyphene Hydrochloride         | Propoxyphene   | SA |
| DOLENE COMPOUND-65                    | Aspirin/Caffeine/Propoxyphene Hydrochloride      | Propoxyphene   | SA |
| DORAPHEN CO-65                        | Aspirin/Caffeine/Propoxyphene Hydrochloride      | Propoxyphene   | SA |
| DORAPHEN-65                           | Propoxyphene Hydrochloride                       | Propoxyphene   | SA |
| DOXAPAP-N 100                         | Acetaminophen/Propoxyphene Napsylate             | Propoxyphene   | SA |
| DOXAPHENE COMPOUND                    | Aspirin/Caffeine/Propoxyphene Hydrochloride      | Propoxyphene   | SA |
| D-REX 65                              | Acetaminophen/Propoxyphene Hydrochloride         | Propoxyphene   | SA |

|                                     |                                                  |                |    |
|-------------------------------------|--------------------------------------------------|----------------|----|
| D-REX 65                            | Aspirin/Caffeine/Propoxyphene Hydrochloride      | Propoxyphene   | SA |
| D-REX 65                            | Propoxyphene Hydrochloride                       | Propoxyphene   | SA |
| E-LOR                               | Acetaminophen/Propoxyphene Hydrochloride         | Propoxyphene   | SA |
| EMCODEINE                           | Aspirin/Codeine Phosphate                        | Codeine        | SA |
| EMPIRIN W/CODEINE                   | Aspirin/Codeine Phosphate                        | Codeine        | SA |
| EMPRACET                            | Acetaminophen/Codeine Phosphate                  | Codeine        | SA |
| EZ III                              | Acetaminophen/Codeine Phosphate                  | Codeine        | SA |
| FEBRIDYNE                           | Acetaminophen/Codeine Phosphate                  | Codeine        | SA |
| FIORGEN W/CODEINE                   | Aspirin/Butalbital/Caffeine/Codeine Phosphate    | Codeine        | SA |
| FIORICET W/CODEINE                  | APAP/Butalbital/Caff/Codeine Phos                | Codeine        | SA |
| FIORTAL W/CODEINE                   | Aspirin/Butalbital/Caffeine/Codeine Phosphate    | Codeine        | SA |
| FUSEPAQ SYNAPRYN                    | Tramadol Hydrochloride                           | Tramadol       | SA |
| G-3                                 | APAP/Butabarbital Na/Codeine Phos                | Codeine        | SA |
| IDENAL                              | Aspirin/Butalbital/Caffeine/Codeine Phosphate    | Codeine        | SA |
| ISOBUTAL                            | Aspirin/Butalbital/Caffeine/Codeine Phosphate    | Codeine        | SA |
| ISOLLYL W/CODEINE                   | Aspirin/Butalbital/Caffeine/Codeine Phosphate    | Codeine        | SA |
| MARGESIC #3                         | Acetaminophen/Codeine Phosphate                  | Codeine        | SA |
| MARGESIC 65                         | Propoxyphene Hydrochloride                       | Propoxyphene   | SA |
| MARGESIC A-C                        | Aspirin/Caffeine/Propoxyphene Hydrochloride      | Propoxyphene   | SA |
| M-GESIC                             | Acetaminophen/Codeine Phosphate                  | Codeine        | SA |
| MYGRANOL W/CODEINE                  | Aspirin/Butalbital/Caffeine/Codeine Phosphate    | Codeine        | SA |
| NALOXONE/PENTAZOCINE                | Naloxone Hydrochloride/Pentazocine Hydrochloride | Pentazocine    | SA |
| PANADOL W/CODEINE                   | Acetaminophen/Codeine Phosphate                  | Codeine        | SA |
| PANCET                              | Acetaminophen/Propoxyphene Hydrochloride         | Propoxyphene   | SA |
| PANLOR DC                           | Acetaminophen/Caffeine/Dihydrocodeine Bitartrate | Dihydrocodeine | SA |
| PANLOR SS                           | Acetaminophen/Caffeine/Dihydrocodeine Bitartrate | Dihydrocodeine | SA |
| PANLOR-DC                           | Acetaminophen/Caffeine/Dihydrocodeine Bitartrate | Dihydrocodeine | SA |
| PANLOR-SS                           | Acetaminophen/Caffeine/Dihydrocodeine Bitartrate | Dihydrocodeine | SA |
| PC-CAP                              | Aspirin/Caffeine/Propoxyphene Hydrochloride      | Propoxyphene   | SA |
| PENTAZOCIN/NALOXONE                 | Naloxone Hydrochloride/Pentazocine Hydrochloride | Pentazocine    | SA |
| PHENAPHEN W/CODEINE                 | Acetaminophen/Codeine Phosphate                  | Codeine        | SA |
| PHENAPHEN-650 W/CODEINE             | Acetaminophen/Codeine Phosphate                  | Codeine        | SA |
| PHRENILIN W/CAFFEINE/CODEINE        | APAP/Butalbital/Caff/Codeine Phos                | Codeine        | SA |
| PHRENILIN W/CODEINE                 | Acetaminophen/Butalbital/Codeine Phosphate       | Codeine        | SA |
| PHRENILIN WITH CAFFEINE AND CODEINE | APAP/Butalbital/Caff/Codeine Phos                | Codeine        | SA |
| PP-CAP                              | Propoxyphene Hydrochloride                       | Propoxyphene   | SA |
| PRO POX 65                          | Propoxyphene Hydrochloride                       | Propoxyphene   | SA |

|                                          |                                             |                |    |
|------------------------------------------|---------------------------------------------|----------------|----|
| PRO POX PLUS                             | Aspirin/Caffeine/Propoxyphene Hydrochloride | Propoxyphene   | SA |
| PRO POX W/APAP                           | Acetaminophen/Propoxyphene Hydrochloride    | Propoxyphene   | SA |
| PRONAP-100                               | Acetaminophen/Propoxyphene Napsylate        | Propoxyphene   | SA |
| PROPACET 100                             | Acetaminophen/Propoxyphene Napsylate        | Propoxyphene   | SA |
| PROPOXACET                               | Acetaminophen/Propoxyphene Hydrochloride    | Propoxyphene   | SA |
| PROPOXACET-N                             | Acetaminophen/Propoxyphene Napsylate        | Propoxyphene   | SA |
| PROPOXACET-N 100                         | Acetaminophen/Propoxyphene Napsylate        | Propoxyphene   | SA |
| PROPOXY NAPS/APAP                        | Acetaminophen/Propoxyphene Napsylate        | Propoxyphene   | SA |
| PROPOXY NAPS/APAP-100                    | Acetaminophen/Propoxyphene Napsylate        | Propoxyphene   | SA |
| PROPOXY/APAP-65                          | Acetaminophen/Propoxyphene Hydrochloride    | Propoxyphene   | SA |
| PROPOXYCON                               | Propoxyphene Hydrochloride                  | Propoxyphene   | SA |
| PROPOXYPHENE                             | Propoxyphene Hydrochloride                  | Propoxyphene   | SA |
| PROPOXYPHENE COMPOUND                    | Aspirin/Caffeine/Propoxyphene Hydrochloride | Propoxyphene   | SA |
| PROPOXYPHENE COMPOUND-65                 | Aspirin/Caffeine/Propoxyphene Hydrochloride | Propoxyphene   | SA |
| PROPOXYPHENE HCL                         | Propoxyphene Hydrochloride                  | Propoxyphene   | SA |
| PROPOXYPHENE HCL COMPOUND                | Aspirin/Caffeine/Propoxyphene Hydrochloride | Propoxyphene   | SA |
| PROPOXYPHENE HCL W/ACETAMINOPHEN         | Acetaminophen/Propoxyphene Hydrochloride    | Propoxyphene   | SA |
| PROPOXYPHENE HYDROCHLORIDE               | Propoxyphene Hydrochloride                  | Propoxyphene   | SA |
| PROPOXYPHENE NAPSYLATE                   | Propoxyphene Napsylate                      | Propoxyphene   | SA |
| PROPOXYPHENE NAPSYLATE & ACETAMINOPHEN   | Acetaminophen/Propoxyphene Napsylate        | Propoxyphene   | SA |
| ANOLOR DH 5                              | Acetaminophen/Hydrocodone Bitartrate        | Hydrocodone    | SA |
| APAP W/HYDROCODONE                       | Acetaminophen/Hydrocodone Bitartrate        | Hydrocodone    | SA |
| PROPOXYPHENE NAPSYLATE AND ACETAMINOPHEN | Acetaminophen/Propoxyphene Napsylate        | Propoxyphene   | SA |
| PROPOXYPHENE NAPSYLATE W/APAP            | Acetaminophen/Propoxyphene Napsylate        | Propoxyphene   | SA |
| HYDROGESIC                               | Acetaminophen/Hydrocodone Bitartrate        | Hydrocodone    | SA |
| PROPOXYPHENE NAPSYLATE/ACETAMINOPHEN     | Acetaminophen/Propoxyphene Napsylate        | Propoxyphene   | SA |
| PROPOXYPHENE NAPSYLATE/APAP              | Acetaminophen/Propoxyphene Napsylate        | Propoxyphene   | SA |
| PROPOXYPHENE W/ASPIRIN & CAFFEINE        | Aspirin/Caffeine/Propoxyphene Hydrochloride | Propoxyphene   | SA |
| PROPOXYPHENE-N W/ APAP                   | Acetaminophen/Propoxyphene Napsylate        | Propoxyphene   | SA |
| PROVAL                                   | Acetaminophen/Codeine Phosphate             | Codeine        | SA |
| PYREGESIC-C                              | Acetaminophen/Codeine Phosphate             | Codeine        | SA |
| REGAL-DC                                 | Dihydrocodeine/Apap/Caffeine                | Dihydrocodeine | SA |
| SK-65                                    | Propoxyphene Hydrochloride                  | Propoxyphene   | SA |

|                                     |                                                  |                |    |
|-------------------------------------|--------------------------------------------------|----------------|----|
| SK-65 APAP                          | Acetaminophen/Propoxyphene Hydrochloride         | Propoxyphene   | SA |
| SK-65 COMPOUND                      | Aspirin/Caffeine/Propoxyphene Hydrochloride      | Propoxyphene   | SA |
| SK-APAP W/CODEINE                   | Acetaminophen/Codeine Phosphate                  | Codeine        | SA |
| APAP W/OXYCODONE                    | Acetaminophen/Oxycodone Hydrochloride            | Oxycodone SA   | SA |
| SOMA COMPOUND W/CODEINE             | Aspirin/Carisoprodol/Codeine Phosphate           | Codeine        | SA |
| STADOL NS                           | Butorphanol Tartrate                             | Butorphanol    | SA |
| TALACEN                             | Acetaminophen/Pentazocine Hydrochloride          | Pentazocine    | SA |
| TALWIN COMPOUND                     | Aspirin/Pentazocine Hydrochloride                | Pentazocine    | SA |
| TALWIN NX                           | Naloxone Hydrochloride/Pentazocine Hydrochloride | Pentazocine    | SA |
| TRAMADOL                            | Tramadol Hydrochloride                           | Tramadol       | SA |
| HYDROMORPHONE HCL                   | Hydromorphone Hydrochloride                      | Hydromorphone  | LA |
| HYDROMORPHONE HYDROCHLORIDE         | Hydromorphone Hydrochloride                      | Hydromorphone  | LA |
| HYSINGLA ER                         | Hydrocodone Bitartrate                           | Hydrocodone    | LA |
| LEVO-DROMORAN                       | Levorphanol Tartrate                             | Levorphanol    | LA |
| METHADONE                           | Methadone Hydrochloride                          | Methadone      | LA |
| METHADONE DISP                      | Methadone Hydrochloride                          | Methadone      | LA |
| APAP/HYDROCODONE                    | Acetaminophen/Hydrocodone Bitartrate             | Hydrocodone    | SA |
| ETH-OXYDOSE                         | Oxycodone Hydrochloride                          | Oxycodone SA   | SA |
| METHADOSE DISP                      | Methadone Hydrochloride                          | Methadone      | LA |
| TRAMADOL HCL/ACETAMINOPHEN          | Acetaminophen/Tramadol Hydrochloride             | Tramadol       | SA |
| TRAMADOL HCL-ACETAMINOPHEN          | Acetaminophen/Tramadol Hydrochloride             | Tramadol       | SA |
| APAP/OXYCODONE                      | Acetaminophen/Oxycodone Hydrochloride            | Oxycodone SA   | SA |
| ASPIRIN W/OXYCODONE                 | ASA/Oxycodone HCl/Oxycodone Terephthalate        | Oxycodone SA   | SA |
| ASPIRIN/OXYCODONE                   | ASA/Oxycodone HCl/Oxycodone Terephthalate        | Oxycodone SA   | SA |
| ASTRAMORPH                          | Morphine Sulfate                                 | Morphine SA    | SA |
| ASTRAMORPH/PF                       | Morphine Sulfate                                 | Morphine SA    | SA |
| AZDONE                              | Aspirin/Hydrocodone Bitartrate                   | Hydrocodone    | SA |
| B & O SUPPRETTES 15A                | Belladonna Alkaloids/Opium Alkaloids             | Opium          | SA |
| B & O SUPPRETTES 16A                | Belladonna Alkaloids/Opium Alkaloids             | Opium          | SA |
| MORPHINE SULFATE CONTROLLED RELEASE | Morphine Sulfate                                 | Morphine LA    | LA |
| MORPHINE SULFATE CR                 | Morphine Sulfate                                 | Morphine LA    | LA |
| MORPHINE SULFATE ER                 | Morphine Sulfate                                 | Morphine LA    | LA |
| BANCAP H.C.                         | Acetaminophen/Hydrocodone Bitartrate             | Hydrocodone    | SA |
| DILAUDID-HP                         | Hydromorphone Hydrochloride                      | Hydromorphone  | SA |
| A.B.C. W/CODEINE                    | Aspirin/Butalbital/Caffeine/Codeine Phosphate    | Codeine        | SA |
| TREZIX                              | Acetaminophen/Caffeine/Dihydrocodeine            | Dihydrocodeine | SA |

|                                        |                                                  |                |    |
|----------------------------------------|--------------------------------------------------|----------------|----|
| TY-CAPS W/CODEINE                      | Acetaminophen/Codeine Phosphate                  | Codeine        | SA |
| TYLAPRIN W/CODEINE                     | Acetaminophen/Codeine Phosphate                  | Codeine        | SA |
| TYLENOL W/CODEINE                      | Acetaminophen/Codeine Phosphate                  | Codeine        | SA |
| TYLENOL W/CODEINE #1                   | Acetaminophen/Codeine Phosphate                  | Codeine        | SA |
| TYLENOL W/CODEINE #2                   | Acetaminophen/Codeine Phosphate                  | Codeine        | SA |
| TYLENOL W/CODEINE #3                   | Acetaminophen/Codeine Phosphate                  | Codeine        | SA |
| TYLENOL W/CODEINE #4                   | Acetaminophen/Codeine Phosphate                  | Codeine        | SA |
| TYLENOL W/CODEINE NO 4                 | Acetaminophen/Codeine Phosphate                  | Codeine        | SA |
| TYLENOL WITH CODEINE                   | Acetaminophen/Codeine Phosphate                  | Codeine        | SA |
| ULTRACET                               | Acetaminophen/Tramadol Hydrochloride             | Tramadol       | SA |
| NOVAPLUS FENTANYL TRANSDERMAL SYSTEM   | Fentanyl                                         | Fentanyl LA    | LA |
| ORLAAM                                 | Levomethadyl Acetate Hydrochloride               | Levomethadyl   | LA |
| OXYCODONE                              | Oxycodone Hydrochloride                          | Oxycodone LA   | LA |
| OXYCODONE CR                           | Oxycodone Hydrochloride                          | Oxycodone LA   | LA |
| A.S.A. & CODEINE COMPOUND              | Aspirin/Codeine Phosphate                        | Codeine        | SA |
| ACETACO                                | Acetaminophen/Codeine Phosphate                  | Codeine        | SA |
| ACETAMIN W/ CODEINE                    | Acetaminophen/Codeine Phosphate                  | Codeine        | SA |
| ACETAMIN W/CODEINE                     | Acetaminophen/Codeine Phosphate                  | Codeine        | SA |
| ACETAMIN/BUTAL/CAFF/COD                | APAP/Butalbital/Caff/Codeine Phos                | Codeine        | SA |
| ACETAMINOPHEN                          | Acetaminophen/Codeine Phosphate                  | Codeine        | SA |
| VOPAC                                  | Acetaminophen/Codeine Phosphate                  | Codeine        | SA |
| WYGESIC                                | Acetaminophen/Propoxyphene Hydrochloride         | Propoxyphene   | SA |
| ACETAMINOPHEN AND CODEINE PHOSPHATE #3 | Acetaminophen/Codeine Phosphate                  | Codeine        | SA |
| BANCAP HC                              | Acetaminophen/Hydrocodone Bitartrate             | Hydrocodone    | SA |
| BELLADONNA/OPIUM                       | Belladonna Alkaloids/Opium Alkaloids             | Opium          | SA |
| CEFACLOR                               | Morphine Sulfate                                 | Morphine SA    | SA |
| CETA PLUS                              | Acetaminophen/Hydrocodone Bitartrate             | Hydrocodone    | SA |
| CODEINE                                | Codeine Sulfate                                  | Codeine        | SA |
| CODEINE PHOSPHATE                      | Codeine Phosphate                                | Codeine        | SA |
| CODEINE PHOSPHATE                      | Codeine Sulfate                                  | Codeine        | SA |
| ZERLOR                                 | Acetaminophen/Caffeine/Dihydrocodeine Bitartrate | Dihydrocodeine | SA |
| OXYCODONE HYDROCHLORIDE CR             | Oxycodone Hydrochloride                          | Oxycodone LA   | LA |
| OXYCONTIN CR                           | Oxycodone Hydrochloride                          | Oxycodone LA   | LA |
| OXYCONTIN HYDROCHLORIDE ER             | Oxycodone Hydrochloride                          | Oxycodone LA   | LA |
| OXYMORPHONE HCL                        | Oxymorphone Hydrochloride                        | Oxymorphone LA | LA |
| PALLADONE                              | Hydromorphone Hydrochloride                      | Hydromorphone  | LA |
| ROXANOL                                | Morphine Sulfate                                 | Morphine LA    | LA |
| TRAMADOL HCL                           | Tramadol Hydrochloride                           | Tramadol       | LA |
| ULTRAM                                 | Tramadol Hydrochloride                           | Tramadol       | LA |
| XARTEMIS XR                            | Acetaminophen/Oxycodone Hydrochloride            | Oxycodone LA   | LA |
| XARTEMIS XR                            | Acetaminophen/Oxycodone Hydrochloride            | Oxycodone LA   | LA |
| ZOHYDRO ER                             | Hydrocodone Bitartrate                           | Hydrocodone    | LA |

|                                           |                                                  |                   |    |
|-------------------------------------------|--------------------------------------------------|-------------------|----|
| COMBUNOX                                  | Ibuprofen/Oxycodone Hydrochloride                | Oxycodone<br>SA   | SA |
| DAMASON-P                                 | Aspirin/Hydrocodone Bitartrate                   | Hydrocodone       | SA |
| DAZIDOX                                   | Oxycodone Hydrochloride                          | Oxycodone<br>SA   | SA |
| DEMEROL                                   | Meperidine Hydrochloride                         | Meperidine        | SA |
| DEMEROL APAP                              | Acetaminophen/Meperidine<br>Hydrochloride        | Meperidine        | SA |
| DEMEROL HYDROCHLORIDE                     | Meperidine Hydrochloride                         | Meperidine        | SA |
| ACETAMINOPHEN W/PROPOXYPHENE              | Acetaminophen/Propoxyphene<br>Hydrochloride      | Propoxyphene      | SA |
| ACETAMINOPHEN W/PROPOXYPHENE<br>HCL       | Acetaminophen/Propoxyphene<br>Hydrochloride      | Propoxyphene      | SA |
| DILAUDID-5                                | Hydromorphone Hydrochloride                      | Hydromorpho<br>ne | SA |
| DOLACET                                   | Acetaminophen/Hydrocodone<br>Bitartrate          | Hydrocodone       | SA |
| DOLAGESIC                                 | Acetaminophen/Hydrocodone<br>Bitartrate          | Hydrocodone       | SA |
| DOLFEN                                    | Acetaminophen/Hydrocodone<br>Bitartrate          | Hydrocodone       | SA |
| DOLO-PAP                                  | Acetaminophen/Hydrocodone<br>Bitartrate          | Hydrocodone       | SA |
| DOLOREX FORTE                             | Acetaminophen/Hydrocodone<br>Bitartrate          | Hydrocodone       | SA |
| DUOCET                                    | Acetaminophen/Hydrocodone<br>Bitartrate          | Hydrocodone       | SA |
| DURADYNE DHC                              | Acetaminophen/Hydrocodone<br>Bitartrate          | Hydrocodone       | SA |
| ACETAMINOPHEN AND CODEINE<br>PHOSPHATE #4 | Acetaminophen/Codeine Phosphate                  | Codeine           | SA |
| ENDOCODONE                                | Oxycodone Hydrochloride                          | Oxycodone<br>SA   | SA |
| FENTANYL ORALET                           | Fentanyl Citrate                                 | Fentanyl SA       | SA |
| FENTANYL TROCHE                           | Fentanyl Citrate                                 | Fentanyl SA       | SA |
| GESIC 5                                   | Acetaminophen/Hydrocodone<br>Bitartrate          | Hydrocodone       | SA |
| HY-5                                      | Acetaminophen/Hydrocodone<br>Bitartrate          | Hydrocodone       | SA |
| HYCOGESIC                                 | Acetaminophen/Hydrocodone<br>Bitartrate          | Hydrocodone       | SA |
| HYCOMED                                   | Acetaminophen/Hydrocodone<br>Bitartrate          | Hydrocodone       | SA |
| HYCO-PAP                                  | Acetaminophen/Hydrocodone<br>Bitartrate          | Hydrocodone       | SA |
| HYCOTAB                                   | Acetaminophen/Hydrocodone<br>Bitartrate          | Hydrocodone       | SA |
| HYDROCET                                  | Acetaminophen/Hydrocodone<br>Bitartrate          | Hydrocodone       | SA |
| HYDROCOD BIT & ACET                       | Acetaminophen/Hydrocodone<br>Bitartrate          | Hydrocodone       | SA |
| A.B.C. COMPOUND W/CODEINE                 | Aspirin/Butalbital/Caffeine/Codeine<br>Phosphate | Codeine           | SA |
| ACETAMINOPHEN W/PROPOXYPHENE<br>HCL       | Acetaminophen/Propoxyphene<br>Napsylate          | Propoxyphene      | SA |
| ACETAMINOPHEN WITH CODEINE                | Acetaminophen/Codeine Phosphate                  | Codeine           | SA |
| ACETAMINOPHEN W/ CODEINE                  | Acetaminophen/Codeine Phosphate                  | Codeine           | SA |
| HYDROCODONE BITARTRATE-<br>ACETAMINOPHEN  | Acetaminophen/Hydrocodone Bitartr                | Hydrocodone       | SA |

|                                       |                                                  |                  |    |
|---------------------------------------|--------------------------------------------------|------------------|----|
| ACETAMINOPHEN/COD #4                  | Acetaminophen/Codeine Phosphate                  | Codeine          | SA |
| A.P.C. W/BUTALBITAL & CODEINE         | Aspirin/Butalbital/Caffeine/Codeine Phosphate    | Codeine          | SA |
| HYDROCODONE BITARTRATE-IBUPROFEN      | Hydrocodone Bitartrate/Ibu                       | Hydrocodone      | SA |
| HYDROCODONE W/APAP                    | Acetaminophen/Hydrocodone Bitartrate             | Hydrocodone      | SA |
| HYDROMORPHONE                         | Hydromorphone Hydrochloride                      | Hydromorphone    | SA |
| HYDROMORPHONE HCL                     | Hydromorphone Hydrochloride                      | Hydromorphone SA | SA |
| OXYMORPHONE HCL                       | Oxymorphone Hydrochloride                        | Oxymorphone SA   | SA |
| VICOPROFEN                            | Hydrocodone Bitartrate/Ibuprofen                 | Hydrocodone SA   | SA |
| VICODIN                               | Acetaminophen/Hydrocodone Bitartrate             | Hydrocodone SA   | SA |
| VICODIN ES                            | Acetaminophen/Hydrocodone Bitartrate             | Hydrocodone SA   | SA |
| VICODIN HP                            | Acetaminophen/Hydrocodone Bitartrate             | Hydrocodone SA   | SA |
| TRAMADOL HCL                          | Tramadol Hydrochloride                           | Tramadol SA      | SA |
| HYDROCODONE BITARTRATE-IBUPROFEN      | Hydrocodone Bitartrate/Ibuprofen                 | Hydrocodone SA   | SA |
| HYDROCODONE BITARTRATE-ACETAMINOPHEN  | Acetaminophen/Hydrocodone Bitartrate             | Hydrocodone SA   | SA |
| TRAMADOL HCL/ACETAMINOPHEN            | Acetaminophen/Tramadol Hydrochloride             | Tramadol SA      | SA |
| HYDROMORPHONE HCL                     | Hydromorphone Hydrochloride                      | Hydromorphone LA | LA |
| BUTALBITAL-APAP-CAFFEINE-CODEINE      | Apap/Butalbital/Caff/Codeine Phos                | Codeine          | SA |
| TRAMADOL HCL                          | Tramadol Hydrochloride                           | Tramadol LA      | LA |
| EXALGO                                | Hydromorphone Hydrochloride                      | Hydromorphone LA | LA |
| ZOHYDRO ER                            | Hydrocodone Bitartrate                           | Hydrocodone LA   | LA |
| ULTRACET                              | Acetaminophen/Tramadol Hydrochloride             | Tramadol SA      | SA |
| ULTRAM ER                             | Tramadol Hydrochloride                           | Tramadol LA      | LA |
| ULTRAM                                | Tramadol Hydrochloride                           | Tramadol SA      | SA |
| NUCYNTA                               | Tapentadol Hydrochloride                         | Tapentadol SA    | SA |
| NUCYNTA ER                            | Tapentadol Hydrochloride                         | Tapentadol LA    | LA |
| NORCO                                 | Acetaminophen/Hydrocodone Bitartrate             | Hydrocodone SA   | SA |
| HYSINGLA ER                           | Hydrocodone Bitartrate                           | Hydrocodone LA   | LA |
| DILAUDID                              | Hydromorphone Hydrochloride                      | Hydromorphone SA | SA |
| CONZIP                                | Tramadol Hydrochloride                           | Tramadol LA      | LA |
| FIORICET WITH CODEINE                 | Apap/Butalbital/Caff/Codeine Phos                | Codeine          | SA |
| IBUDONE                               | Hydrocodone Bitartrate/Ibuprofen                 | Hydrocodone SA   | SA |
| ACETAMINOPHEN-CAFFEINE-DIHYDROCODEINE | Acetaminophen/Caffeine/Dihydrocodeine Bitartrate | Dihydrocodeine   | SA |
| XYLON 10                              | Hydrocodone Bitartrate/Ibuprofen                 | Hydrocodone SA   | SA |

|                                      |                                               |                |    |
|--------------------------------------|-----------------------------------------------|----------------|----|
| REPREXAIN                            | Hydrocodone Bitartrate/Ibuprofen              | Hydrocodone SA | SA |
| LORTAB 10/325                        | Acetaminophen/Hydrocodone Bitartrate          | Hydrocodone SA | SA |
| LORTAB 7.5/325                       | Acetaminophen/Hydrocodone Bitartrate          | Hydrocodone SA | SA |
| OXAYDO                               | Oxycodone Hydrochloride                       | Oxycodone SA   | SA |
| LORTAB 7.5/500                       | Acetaminophen/Hydrocodone Bitartrate          | Hydrocodone SA | SA |
| ZAMICET                              | Acetaminophen/Hydrocodone Bitartrate          | Hydrocodone SA | SA |
| LORTAB 10/500                        | Acetaminophen/Hydrocodone Bitartrate          | Hydrocodone SA | SA |
| LORCET HD                            | Acetaminophen/Hydrocodone Bitartrate          | Hydrocodone SA | SA |
| LORTAB 5/325                         | Acetaminophen/Hydrocodone Bitartrate          | Hydrocodone SA | SA |
| LORCET PLUS                          | Acetaminophen/Hydrocodone Bitartrate          | Hydrocodone SA | SA |
| RYBIX ODT                            | Tramadol Hydrochloride                        | Tramadol SA    | SA |
| XODOL                                | Acetaminophen/Hydrocodone Bitartrate          | Hydrocodone SA | SA |
| OXYCODONE HCL-ASPIRIN                | Asa/Oxycodone Hcl/Oxycodone Terephthalate     | Oxycodone SA   | SA |
| XODOL 7.5/300                        | Acetaminophen/Hydrocodone Bitartrate          | Hydrocodone SA | SA |
| XODOL 5/300                          | Acetaminophen/Hydrocodone Bitartrate          | Hydrocodone SA | SA |
| HYDROCET                             | Acetaminophen/Hydrocodone Bitartrate          | Hydrocodone SA | SA |
| LORTAB 5/500                         | Acetaminophen/Hydrocodone Bitartrate          | Hydrocodone SA | SA |
| LORCET                               | Acetaminophen/Hydrocodone Bitartrate          | Hydrocodone SA | SA |
| LORCET 10/650                        | Acetaminophen/Hydrocodone Bitartrate          | Hydrocodone SA | SA |
| RYZOLT                               | Tramadol Hydrochloride                        | Tramadol LA    | LA |
| BELBUCA                              | Buprenorphine                                 | Buprenorphine  | LA |
| XTAMPZA ER                           | Oxycodone                                     | Oxycodone LA   | LA |
| FENTANYL TRANSDERM                   | Fentanyl                                      | Fentanyl LA    | LA |
| BUTALBITAL/ASPIRIN                   | Aspirin/Butalbital/Caffeine/Codeine Phosphate | Codeine        | SA |
| VERDROCET                            | Acetaminophen/Hydrocodone Bitartrate          | Hydrocodone SA | SA |
| BUT/APAP/CAFF/COD                    | Apap/Butalbital/Caff/Codeine Phos             | Codeine        | SA |
| OXYCODONE HCL-ACETAMINOPHEN          | Acetaminophen/oxycodone Hydrochloride         | Oxycodone SA   | SA |
| VICODIN                              | Acetaminophen/hydrocodone Bitartrate          | Hydrocodone SA | SA |
| VICODIN ES                           | Acetaminophen/hydrocodone Bitartrate          | Hydrocodone SA | SA |
| VICODIN HP                           | Acetaminophen/hydrocodone Bitartrate          | Hydrocodone SA | SA |
| ACETAMINOPHEN-CODEINE PHOSPHATE      | Acetaminophen/codeine Phosphate               | Codeine        | SA |
| HYDROCODONE BITARTRATE-ACETAMINOPHEN | Acetaminophen/hydrocodone Bitartrate          | Hydrocodone SA | SA |



|                                       |                                                  |                |    |
|---------------------------------------|--------------------------------------------------|----------------|----|
| OXYCODONE HCL-IBUPROFEN               | Ibuprofen/oxycodone Hydrochloride                | Oxycodone SA   | SA |
| TRAMADOL HCL/ACETAMINOPHEN            | Acetaminophen/tramadol Hydrochloride             | Tramadol SA    | SA |
| BUTALBITAL/ASPIRIN/CAFFEINE/CODEINE   | Aspirin/butalbital/caffeine/codeine Phosphate    | Codeine        | SA |
| PENTAZOCINE HCL-NALOXONE HCL          | Naloxone Hydrochloride/pentazocine Hydrochloride | Pentazocine    | SA |
| BUTALBITAL-APAP-CAFFEINE-CODEINE      | Apap/butalbital/caff/codeine Phos                | Codeine        | SA |
| OXYCODONE HCL-ASPIRIN                 | Aspirin/oxycodone Hydrochloride                  | Oxycodone SA   | SA |
| HYDROCODONE BITARTRATE-IBUPROFEN      | Hydrocodone Bitartrate/ibuprofen                 | Hydrocodone SA | SA |
| XARTEMIS XR                           | Acetaminophen/oxycodone Hydrochloride            | Oxycodone LA   | LA |
| OXYCODONE HCL-ACETAMINO               | Acetaminophen/Oxycodone Hydrochloride            | Oxycodone SA   | SA |
| SYNALGOS-DC                           | Aspirin/caffeine/dihydrocodeine Bitartrate       | Dihydrocodeine | SA |
| TYLENOL WITH CODEINE NO. 3            | Acetaminophen/codeine Phosphate                  | Codeine        | SA |
| TYLENOL WITH CODEINE NO. 4            | Acetaminophen/codeine Phosphate                  | Codeine        | SA |
| ASCOMP W/CODEINE                      | Aspirin/butalbital/caffeine/codeine Phosphate    | Codeine        | SA |
| FIORICET WITH CODEINE                 | Apap/butalbital/caff/codeine Phos                | Codeine        | SA |
| NORCO                                 | Acetaminophen/hydrocodone Bitartrate             | Hydrocodone SA | SA |
| EMBEDA                                | Morphine Sulfate/naltrexone Hydrochloride        | Morphine LA    | LA |
| ENDOCET                               | Acetaminophen/oxycodone Hydrochloride            | Oxycodone SA   | SA |
| PERCOCET                              | Acetaminophen/oxycodone Hydrochloride            | Oxycodone SA   | SA |
| MORPHABOND ER                         | Morphine Sulfate                                 | Morphine LA    | LA |
| ZAMICET                               | Acetaminophen/hydrocodone Bitartrate             | Hydrocodone SA | SA |
| PRIMLEV                               | Acetaminophen/oxycodone Hydrochloride            | Oxycodone SA   | SA |
| ACETAMINOPHEN-CAFFEINE-DIHYDROCODEINE | Acetaminophen/caffeine/dihydrocodeine Bitartrate | Dihydrocodeine | SA |
| ULTRACET                              | Acetaminophen/tramadol Hydrochloride             | Tramadol SA    | SA |
| IBUDONE                               | Hydrocodone Bitartrate/ibuprofen                 | Hydrocodone SA | SA |
| FIORINAL W/CODEINE                    | Aspirin/butalbital/caffeine/codeine Phosphate    | Codeine        | SA |
| REPREXAIN                             | Hydrocodone Bitartrate/ibuprofen                 | Hydrocodone SA | SA |
| TREZIX                                | Acetaminophen/caffeine/dihydrocodeine Bitartrate | Dihydrocodeine | SA |
| ARYMO ER                              | Morphine Sulfate                                 | Morphine LA    | LA |
| ROXICET                               | Acetaminophen/oxycodone Hydrochloride            | Oxycodone SA   | SA |
| LORTAB 5/325                          | Acetaminophen/hydrocodone Bitartrate             | Hydrocodone SA | SA |
| LORTAB 7.5/325                        | Acetaminophen/hydrocodone Bitartrate             | Hydrocodone SA | SA |
| ROXYBOND                              | Oxycodone Hydrochloride                          | Oxycodone SA   | SA |

|                                                  |                                               |                |    |
|--------------------------------------------------|-----------------------------------------------|----------------|----|
| TRAMADOL HCL/ACETA                               | Acetaminophen/Tramadol Hydrochloride          | Tramadol SA    | SA |
| VICOPROFEN                                       | Hydrocodone Bitartrate/ibuprofen              | Hydrocodone SA | SA |
| LORTAB 10/325                                    | Acetaminophen/hydrocodone Bitartrate          | Hydrocodone SA | SA |
| ASPIRIN, CAFFEINE, AND DIHYDROCODEINE BITARTRATE | Aspirin/caffeine/dihydrocodeine Bitartrate    | Dihydrocodeine | SA |
| XODOL 5/300                                      | Acetaminophen/hydrocodone Bitartrate          | Hydrocodone SA | SA |
| NALOCET                                          | Acetaminophen/Oxycodone Hydrochloride         | Oxycodone SA   | SA |
| XODOL                                            | Acetaminophen/hydrocodone Bitartrate          | Hydrocodone SA | SA |
| XODOL 7.5/300                                    | Acetaminophen/hydrocodone Bitartrate          | Hydrocodone SA | SA |
| BUTALBITAL COMPOUND W/CODEINE                    | Aspirin/butalbital/caffeine/codeine Phosphate | Codeine        | SA |
| TYLENOL W/CODEINE #3                             | Acetaminophen/codeine Phosphate               | Codeine        | SA |
| CAPITAL W/CODEINE                                | Acetaminophen/codeine Phosphate               | Codeine        | SA |
| ENDODAN                                          | Aspirin/oxycodone Hydrochloride               | Oxycodone SA   | SA |
| BUT/APAP/CAFF/COD                                | Apap/butalbital/caff/codeine Phos             | Codeine        | SA |

eTable 2. Changes in slope (pre- vs. post-Guideline) by census region for each of the four primary outcomes

| Prescribing measures                               | Census Region        |                     |                      |                     |
|----------------------------------------------------|----------------------|---------------------|----------------------|---------------------|
|                                                    | Northeast<br>(N = 9) | Midwest<br>(N = 12) | South<br>(N = 17)    | West<br>(N = 13)    |
| <b>Overall Dispensing Rate</b>                     |                      |                     |                      |                     |
| 0.00 – 20.00                                       | 3 (33%)              | 4 (33%)             | 4 (24%) <sup>1</sup> | 4 (31%)             |
| 20.01 – 30.00                                      | 2 (22%)              | 2 (17%)             | 4 (24%)              | 3 (23%)             |
| 30.01 – 40.00                                      | 2 (22%)              | 5 (42%)             | 5 (29%)              | 4 (31%)             |
| >40.00                                             | 2 (22%)              | 1 (8%)              | 4 (24%)              | 2 (15%)             |
| <b>High-dosage (&gt;90MME/Day) Dispensing Rate</b> |                      |                     |                      |                     |
| <0.00                                              | 0 (0%)               | 0 (0%)              | 2 (12%) <sup>2</sup> | 1 (8%) <sup>3</sup> |
| 0.00 – 3.00                                        | 2 (22%) <sup>4</sup> | 6 (50%)             | 3 (18%)              | 2 (15%)             |
| 3.01 – 7.00                                        | 3 (33%)              | 3 (25%)             | 6 (35%)              | 6 (46%)             |
| 7.01 – 10.00                                       | 3 (33%)              | 3 (25%)             | 4 (24%)              | 3 (23%)             |
| >10.00                                             | 1 (11%)              | 0 (0%)              | 2 (12%)              | 1 (8%)              |
| <b>Long-acting Dispensing Rate</b>                 |                      |                     |                      |                     |
| 0.00 – 4.00                                        | 3 (33%)              | 5 (42%)             | 5 (29%)              | 2 (15%)             |
| 4.01 – 7.00                                        | 3 (33%)              | 5 (42%)             | 4 (24%)              | 7 (54%)             |
| 7.01 – 10.00                                       | 1 (11%)              | 2 (17%)             | 6 (35%)              | 4 (31%)             |
| >10.00                                             | 2 (22%)              | 0 (0%)              | 2 (12%)              | 0 (0%)              |
| <b>MME Dispensed per Capita</b>                    |                      |                     |                      |                     |
| 0.0 – 0.2                                          | 1 (11%)              | 1 (8%)              | 4 (24%) <sup>5</sup> | 2 (15%)             |
| 0.2 – 0.4                                          | 3 (33%)              | 6 (50%)             | 3 (18%)              | 4 (31%)             |
| 0.4 – 0.6                                          | 2 (22%)              | 3 (25%)             | 4 (24%)              | 4 (31%)             |
| 0.6+                                               | 3 (33%)              | 2 (17%)             | 6 (35%)              | 2 (15%)             |

**Note:** Categories are based on changes in the slope and correspond to dispensing rate before vs. after the release of the 2016 CDC Guideline.

<sup>1</sup> Three out of four states had statistically not significant changes.

<sup>2</sup> One out of two states had statistically not significant changes.

<sup>3</sup> One out of one state had statistically not significant changes.

<sup>4</sup> One out of two states had statistically not significant changes.

<sup>5</sup> One out of four states had statistically not significant changes.

eFigure 1. Trends in the overall dispensing rate from 2021 through 2018, with linear regression lines showing the pre- and post-Guideline slopes superimposed

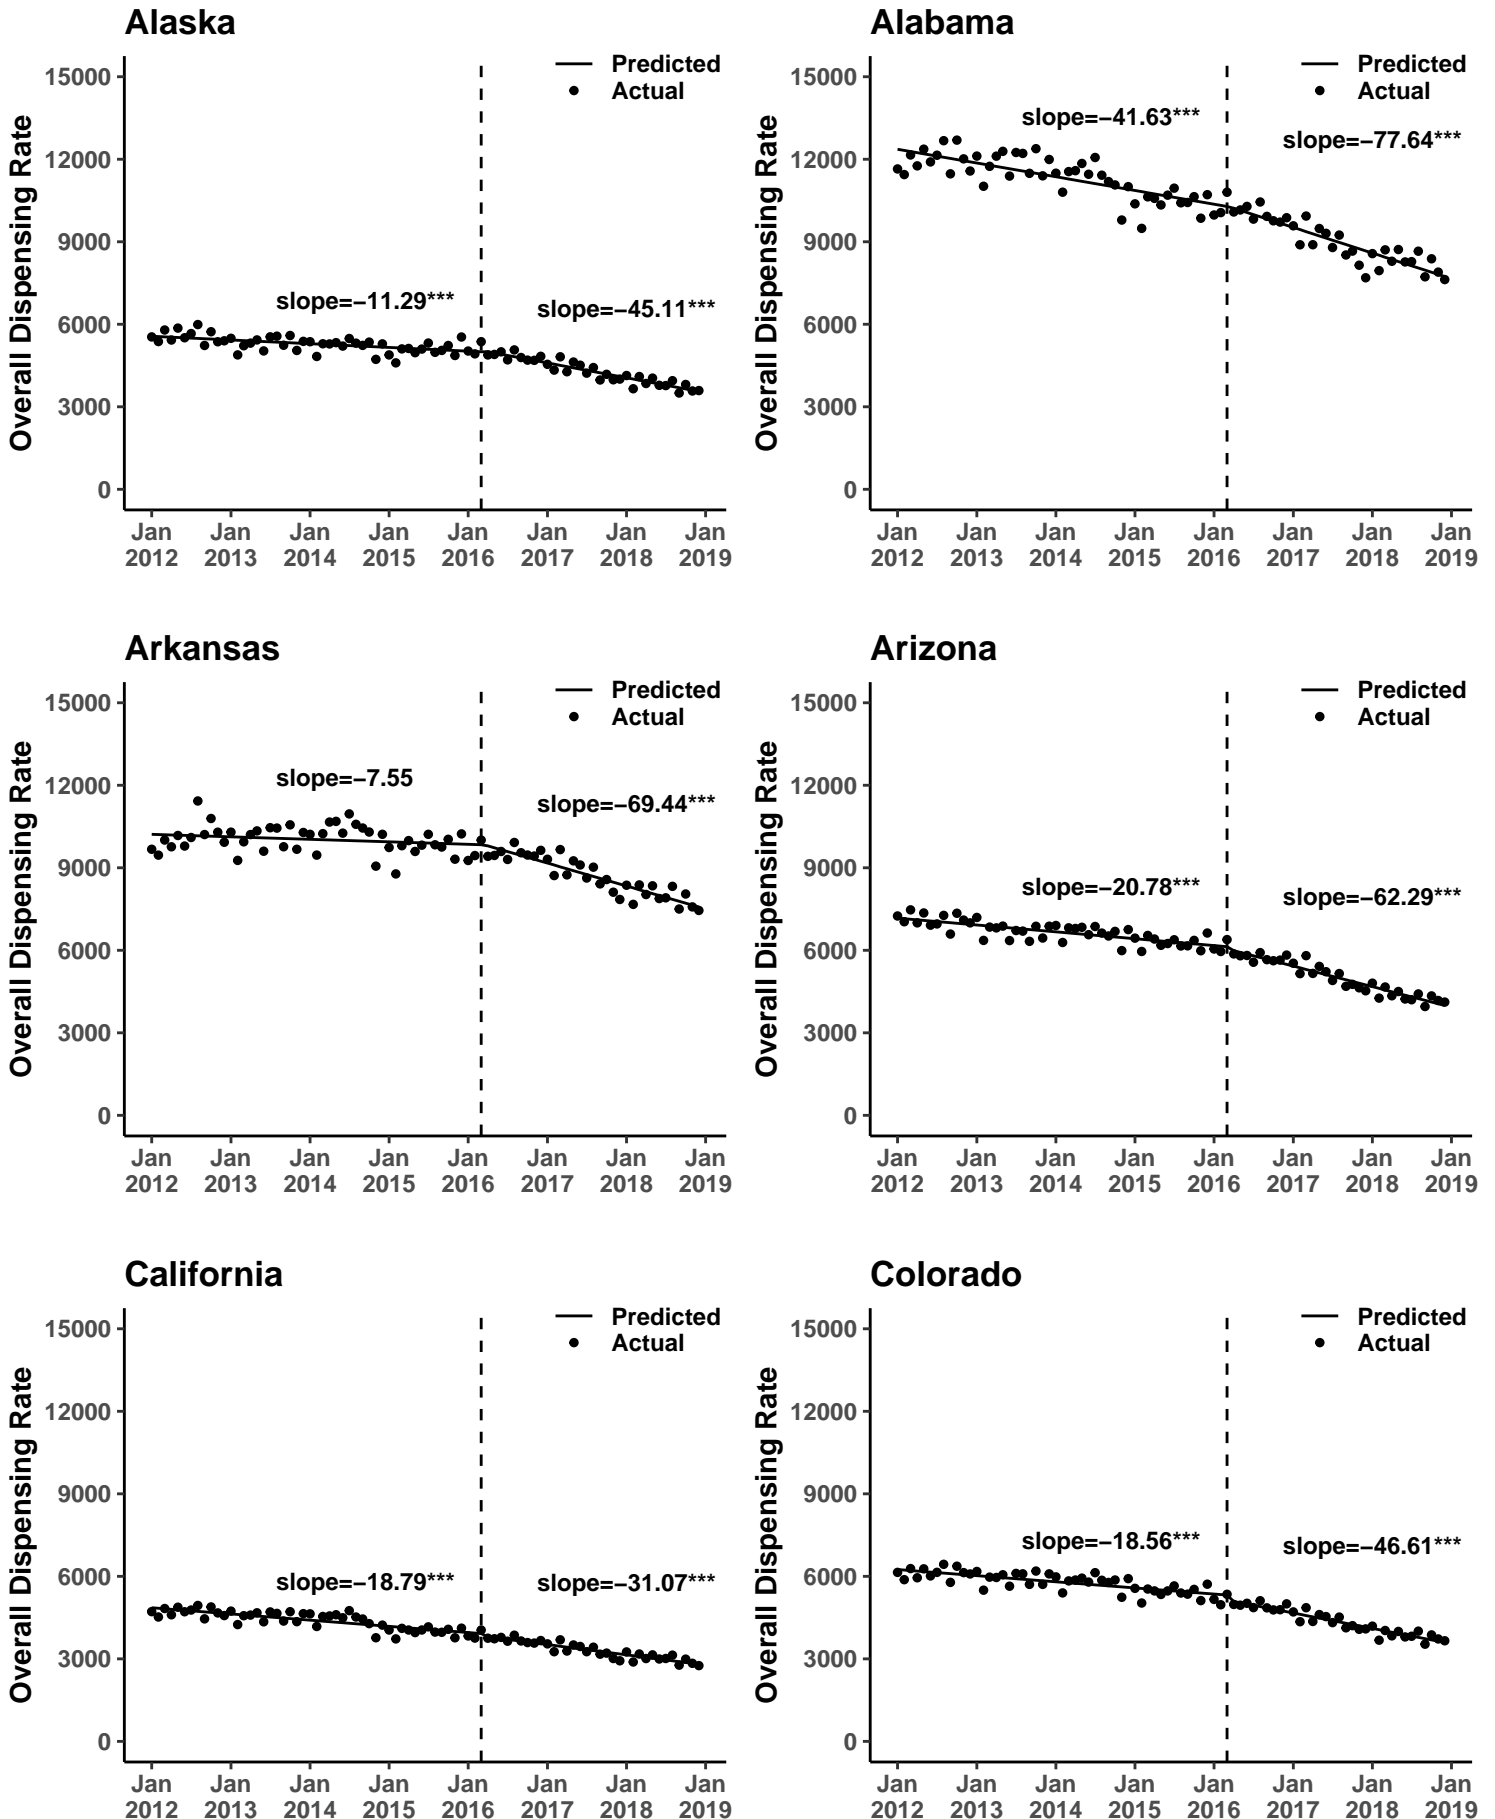

### Connecticut

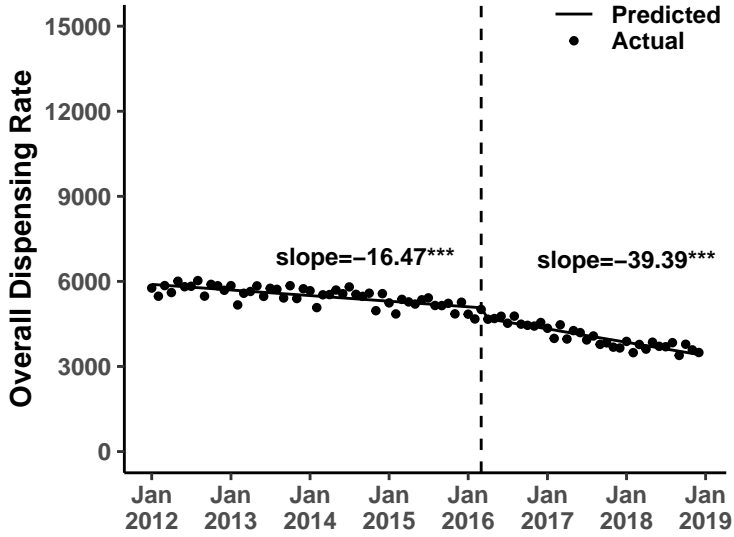

### District of Columbia

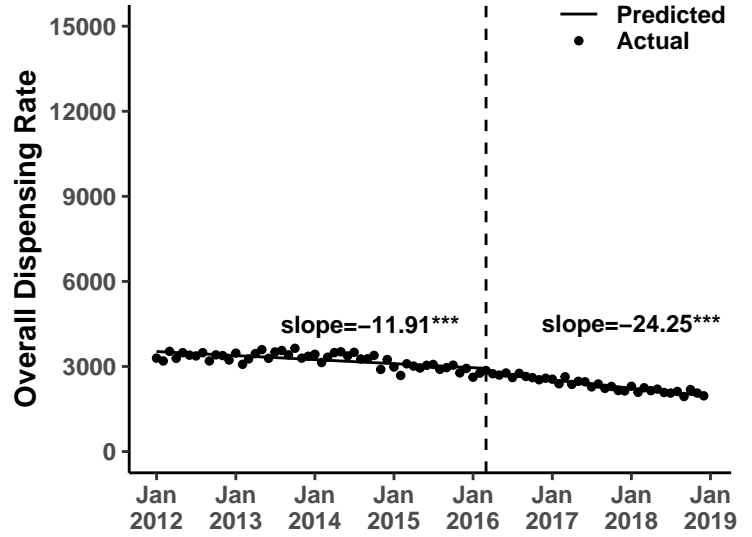

### Delaware

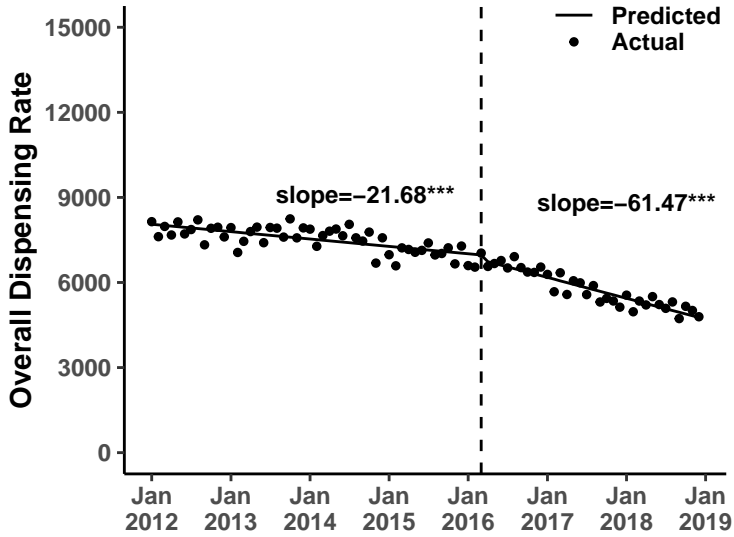

### Florida

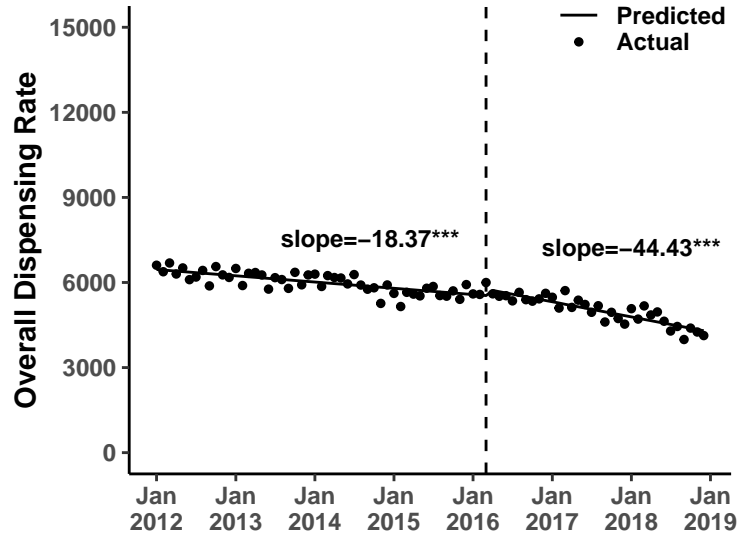

### Georgia

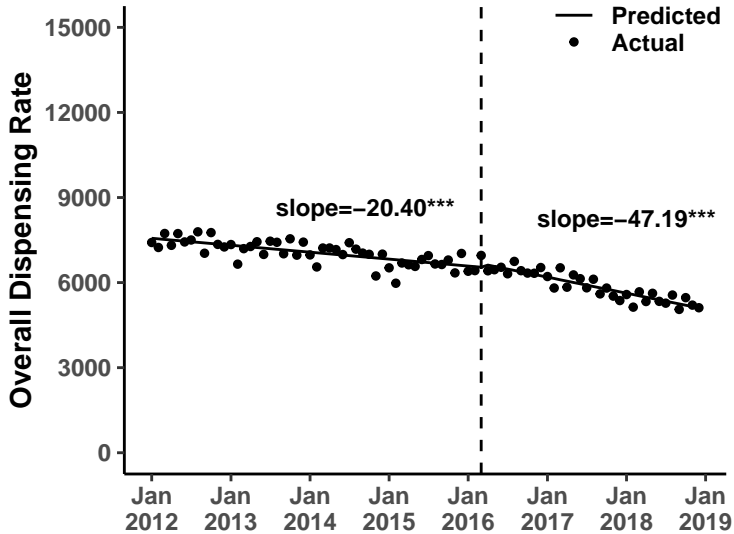

### Hawaii

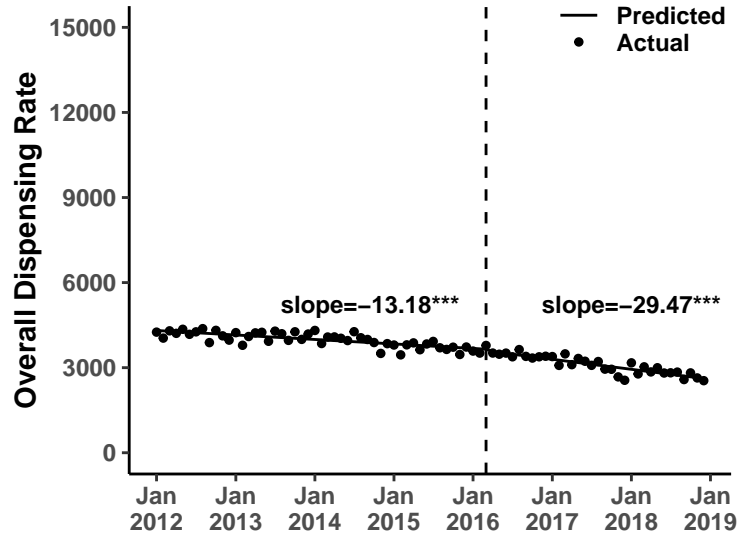

### Iowa

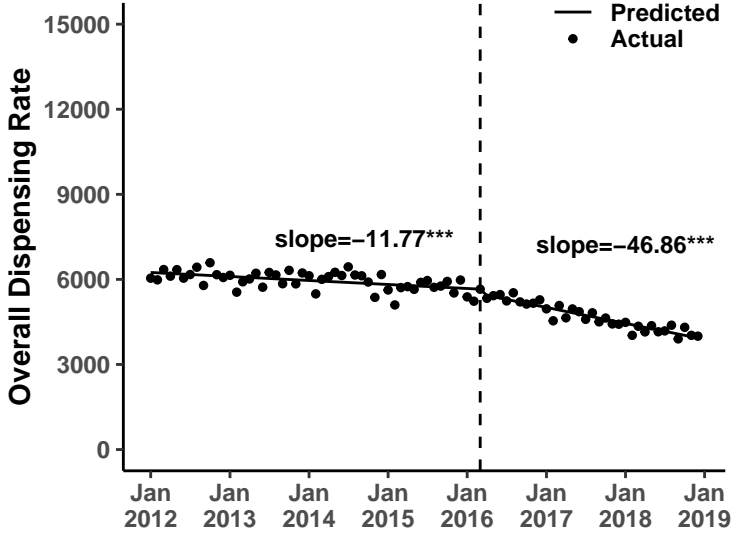

### Idaho

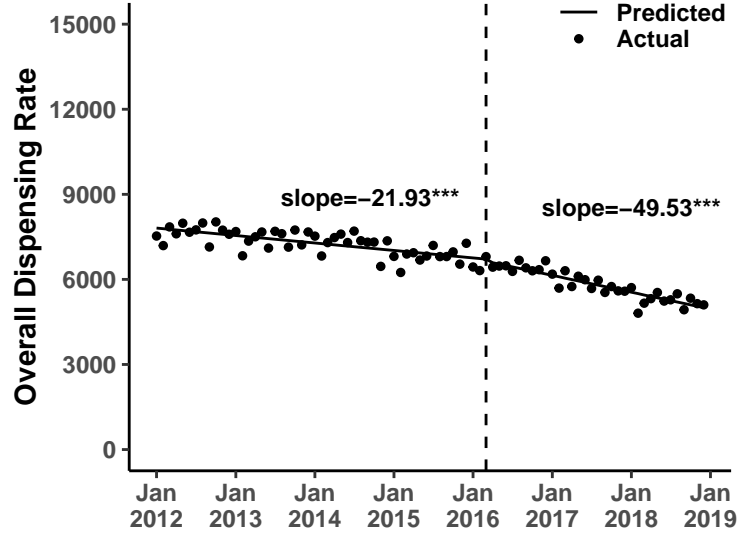

### Illinois

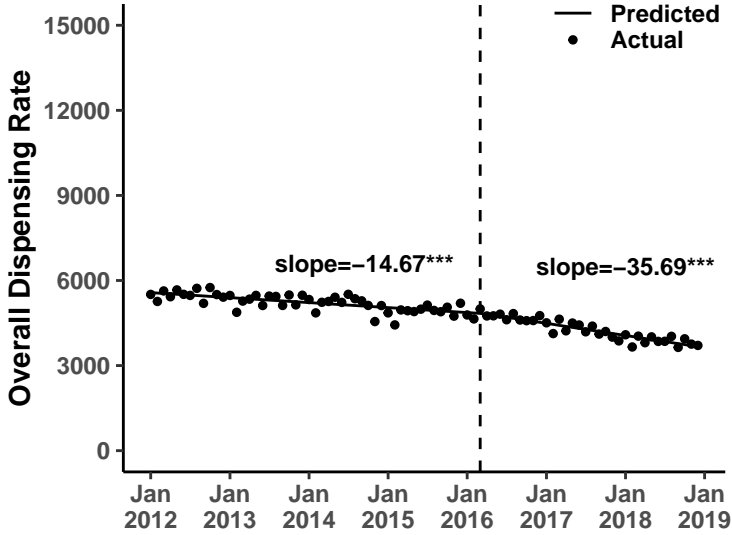

### Indiana

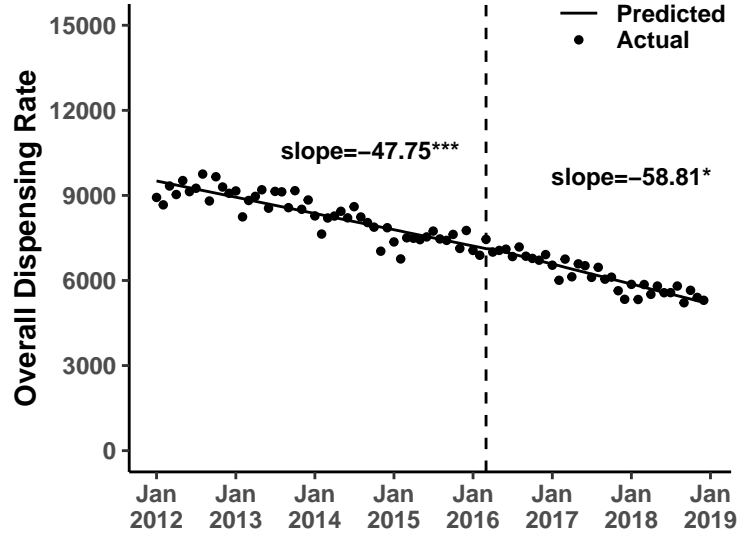

### Kansas

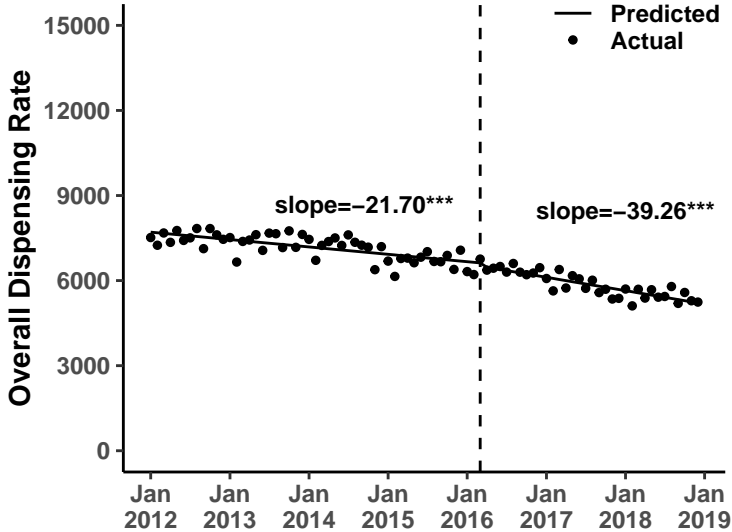

### Kentucky

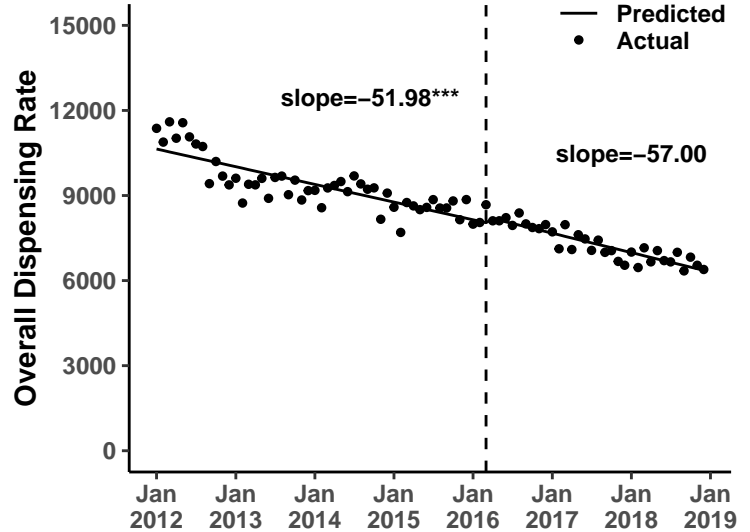

### Louisiana

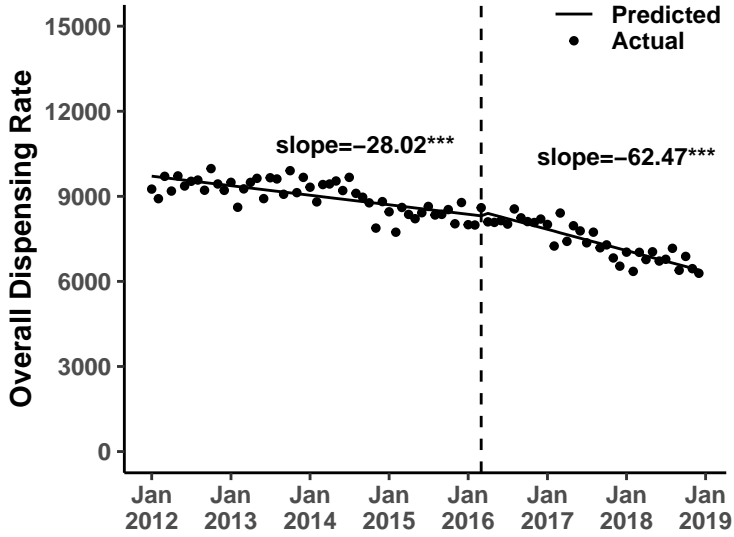

### Massachusetts

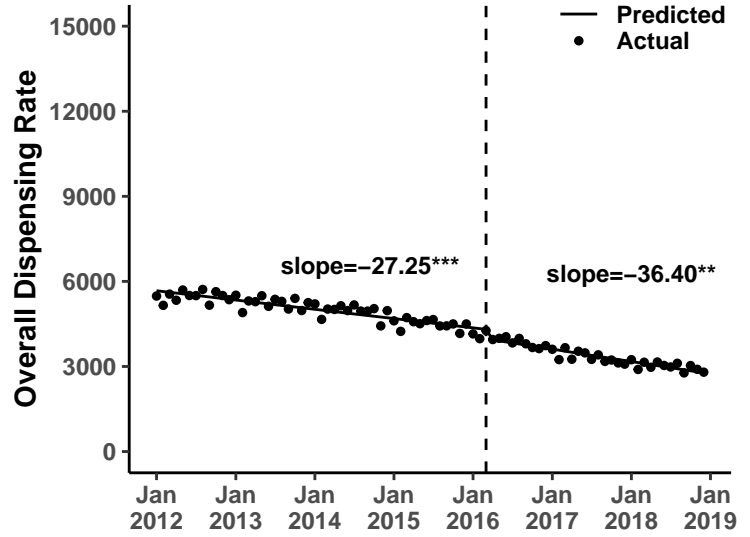

### Maryland

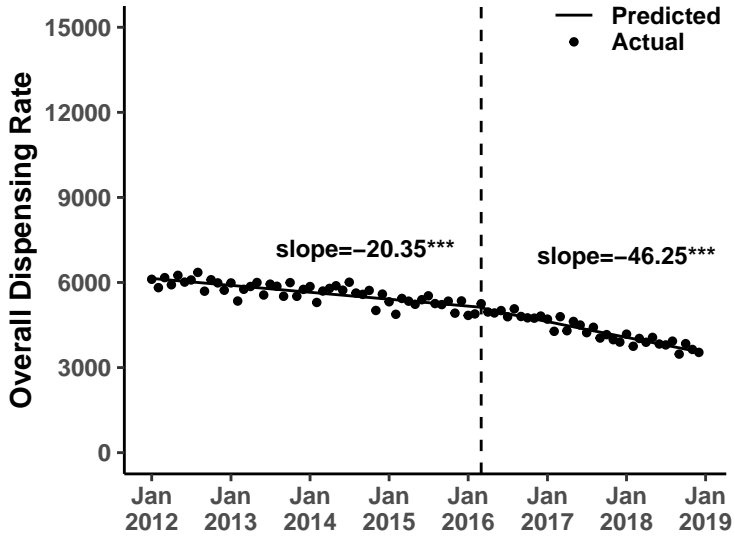

### Maine

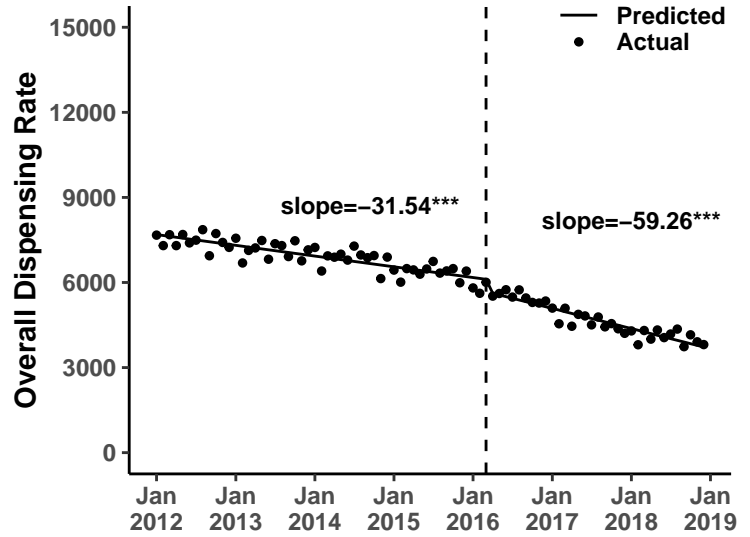

### Michigan

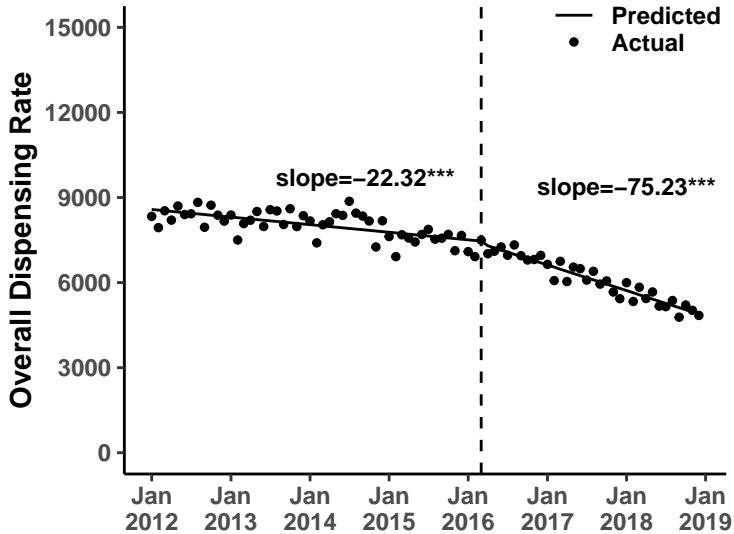

### Minnesota

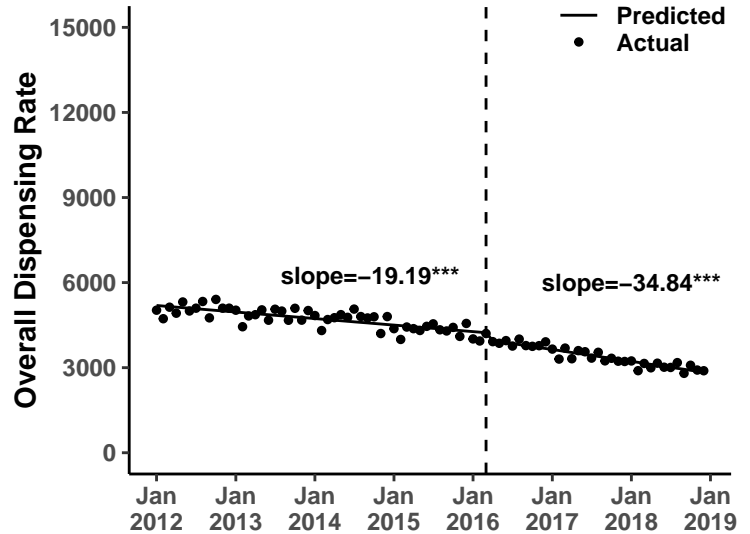

### Missouri

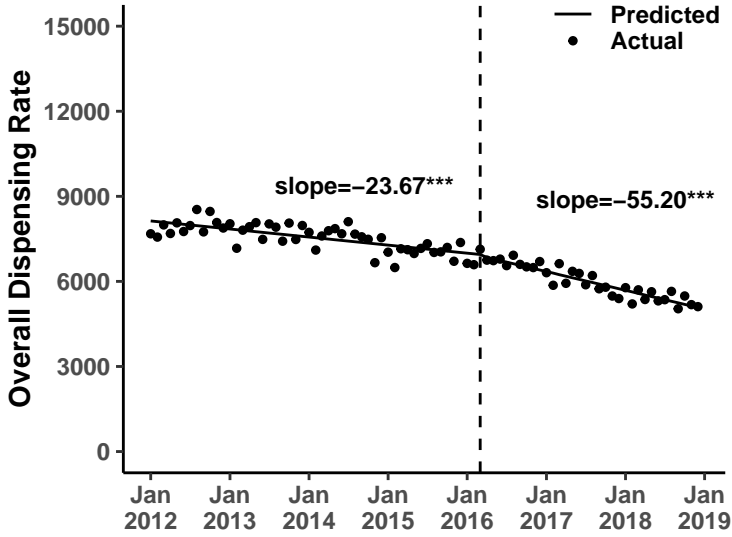

### Mississippi

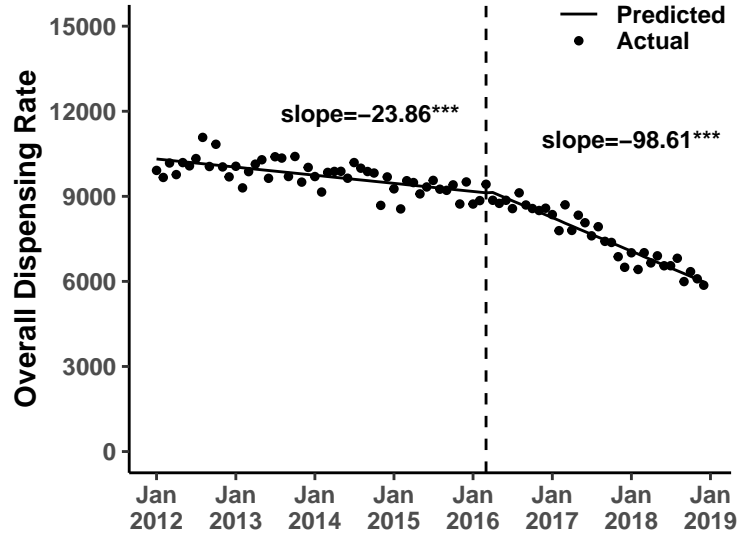

### Montana

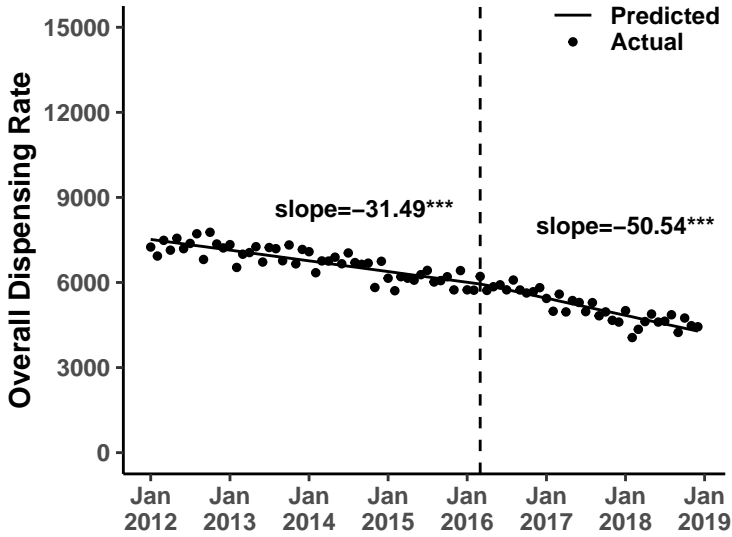

### North Carolina

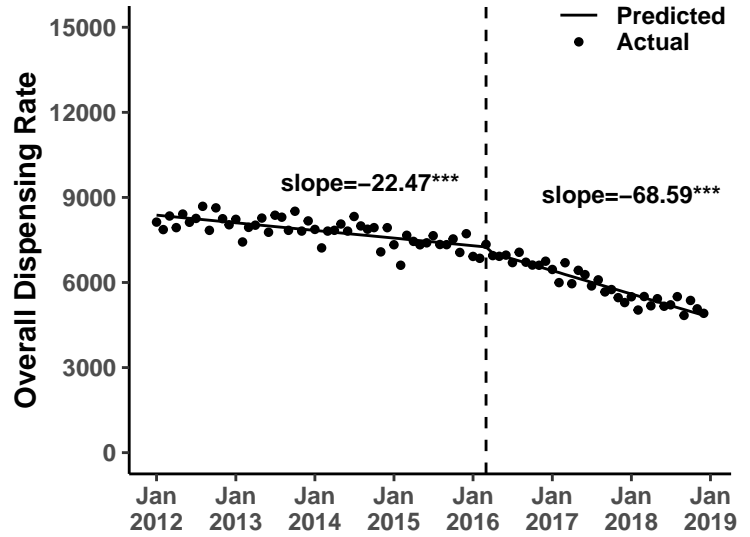

### North Dakota

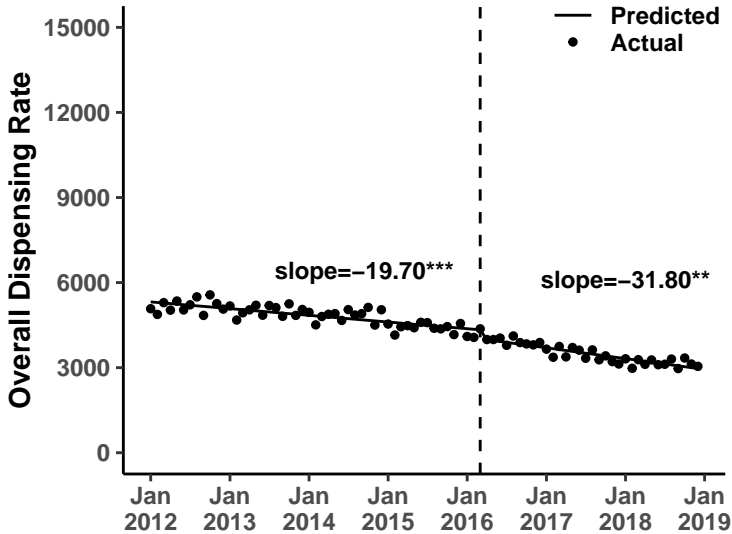

### Nebraska

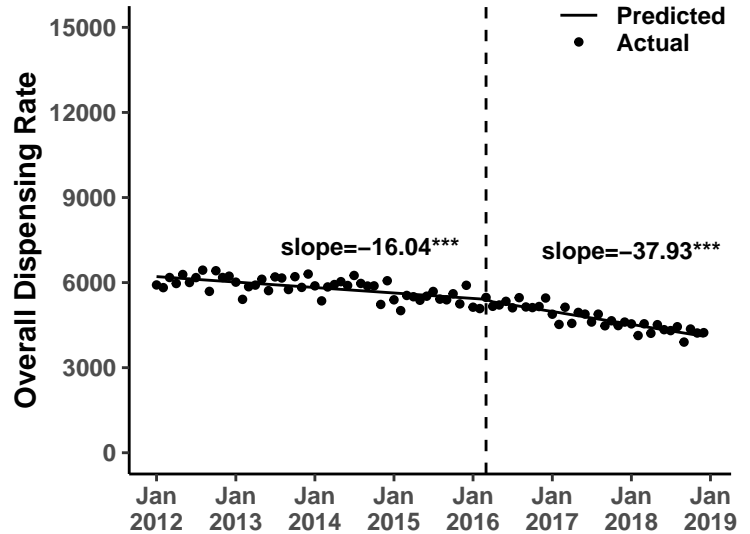



### New Hampshire

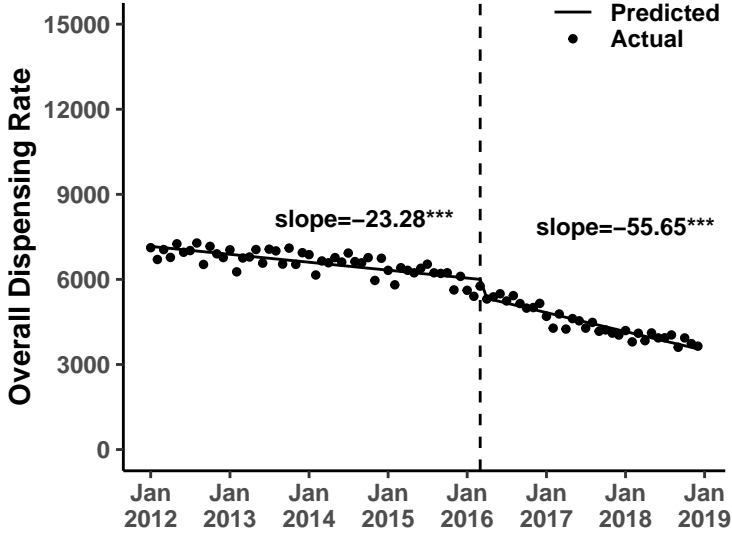

### New Jersey

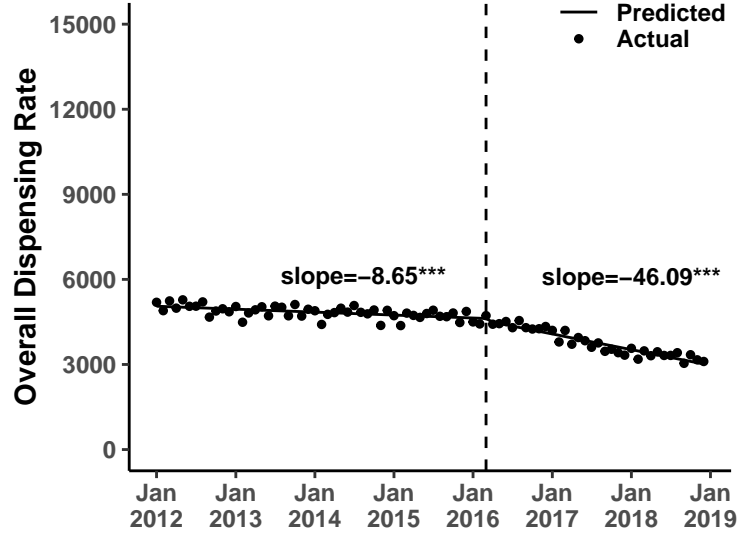

### New Mexico

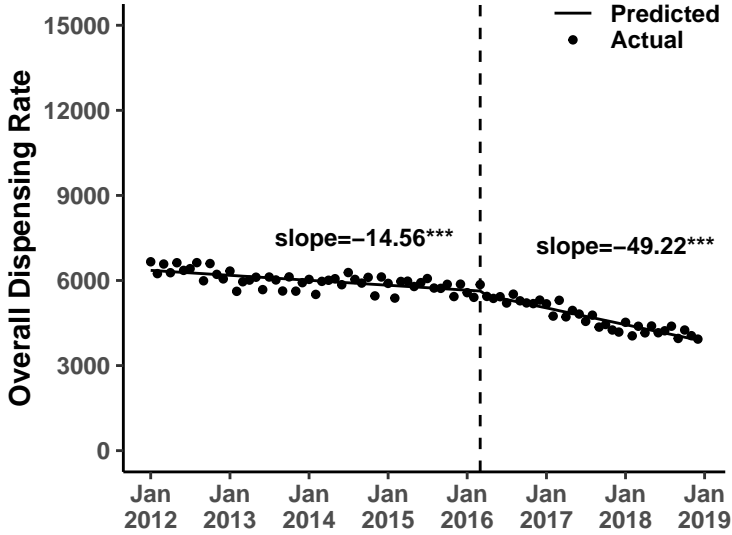

### Nevada

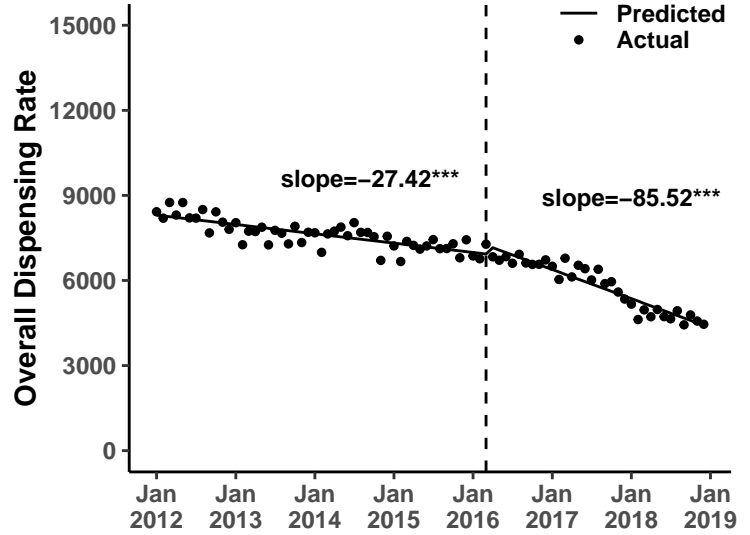

### New York

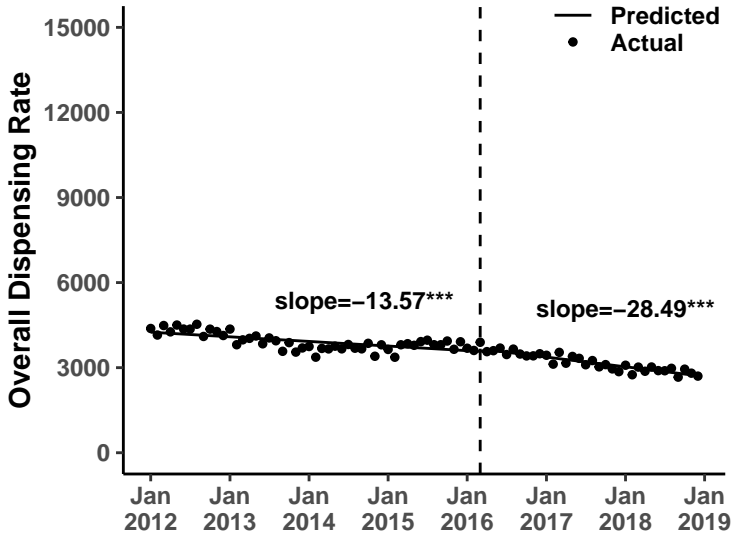

### Ohio

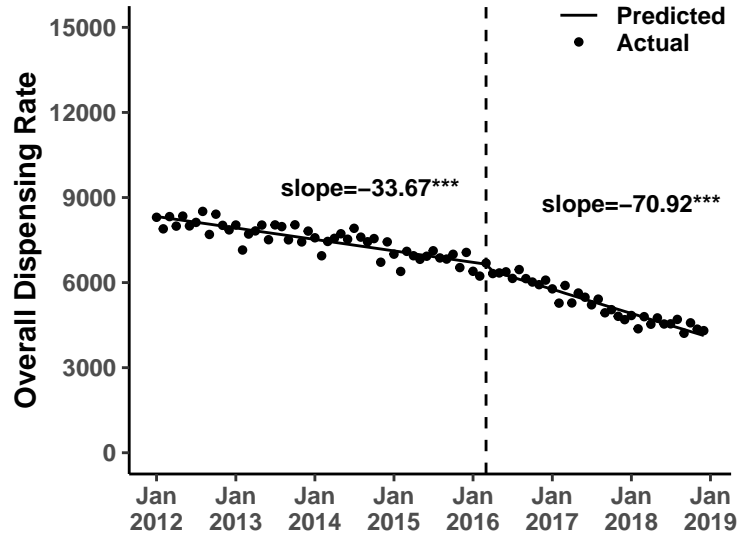

Oklahoma

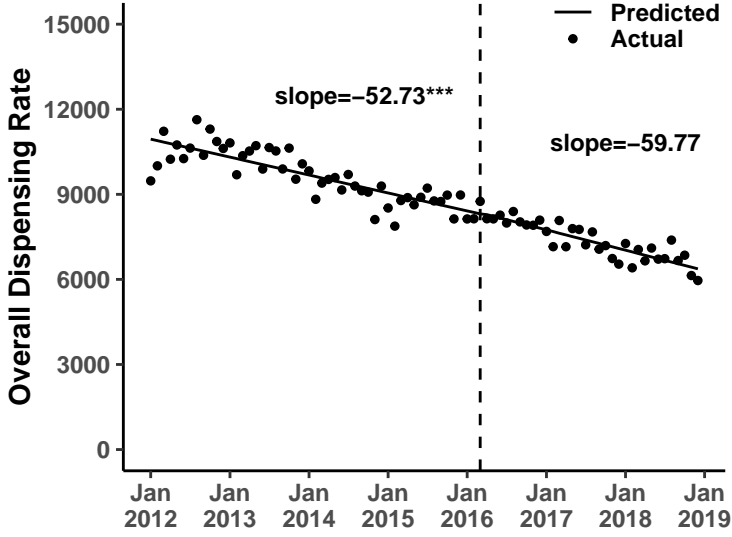

Oregon

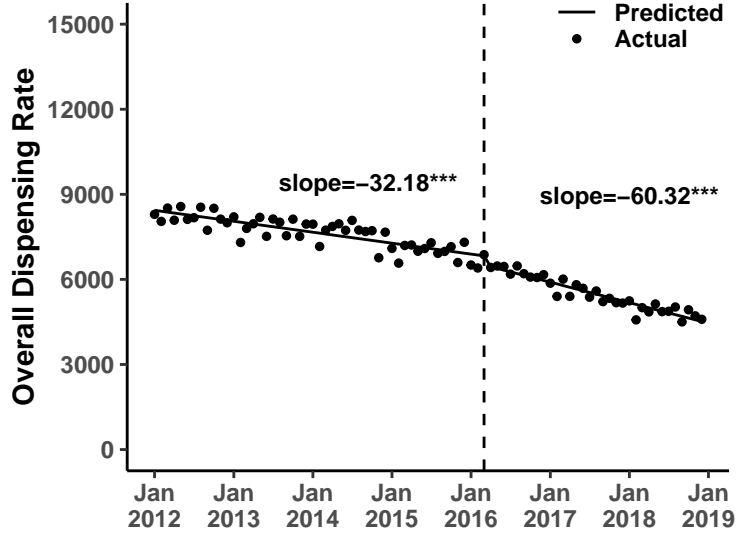

Pennsylvania

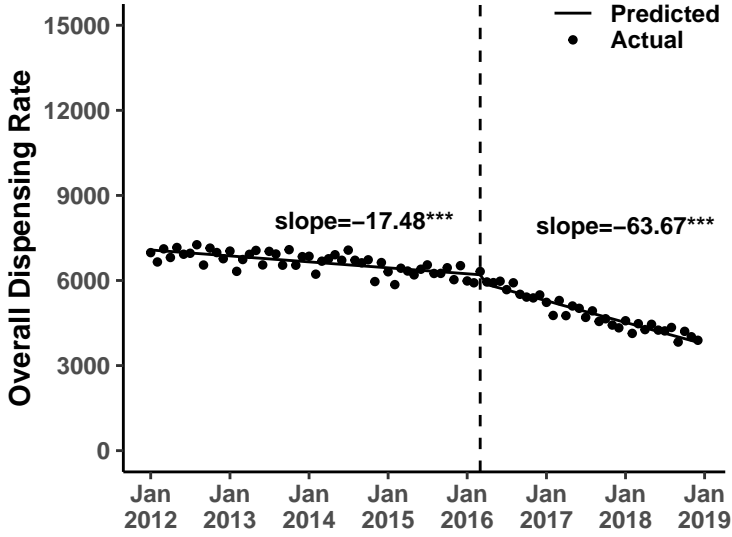

Rhode Island

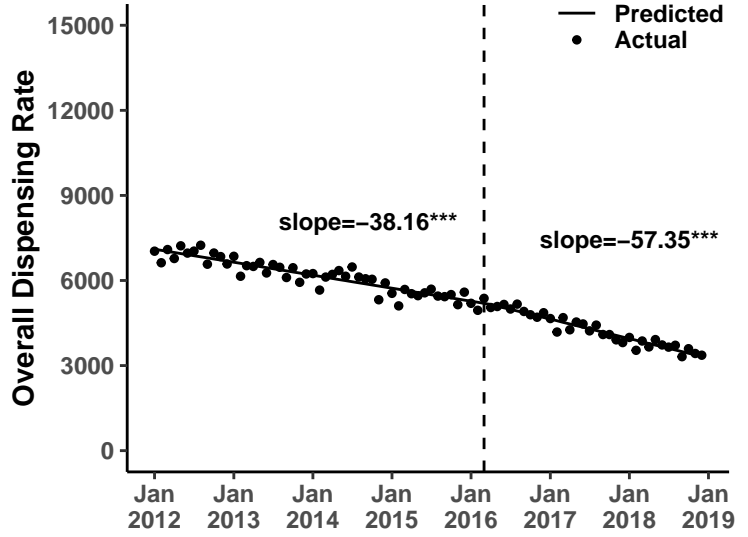

South Carolina

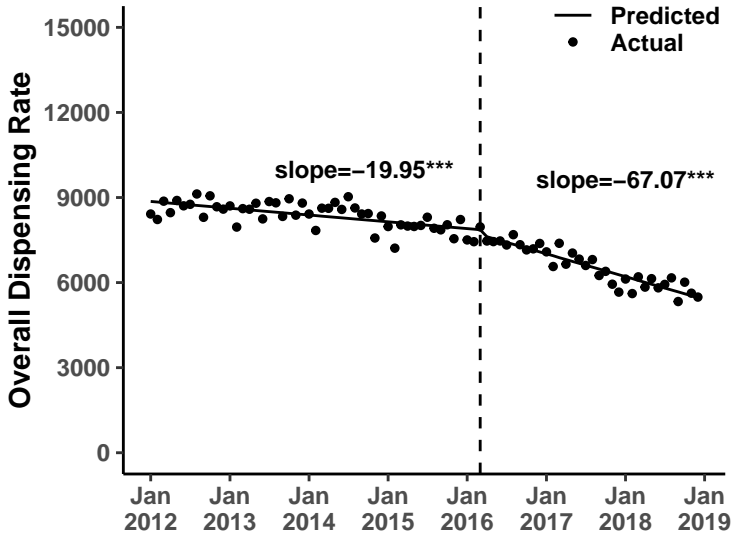

South Dakota

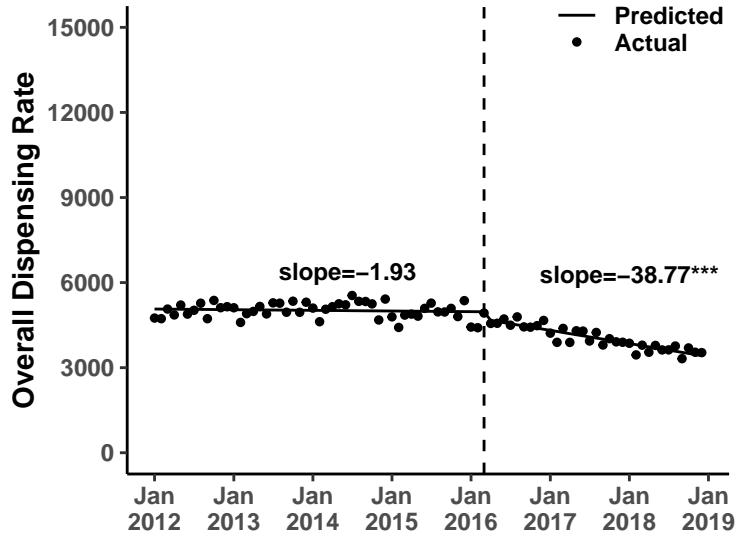

### Tennessee

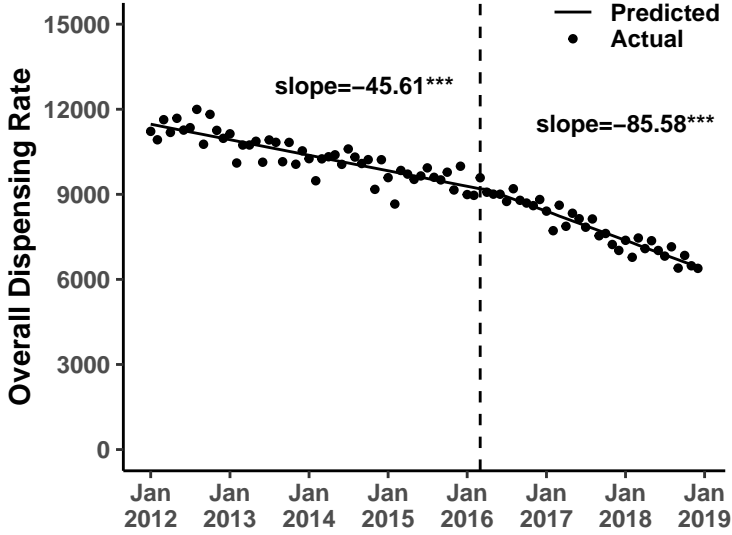

### Texas

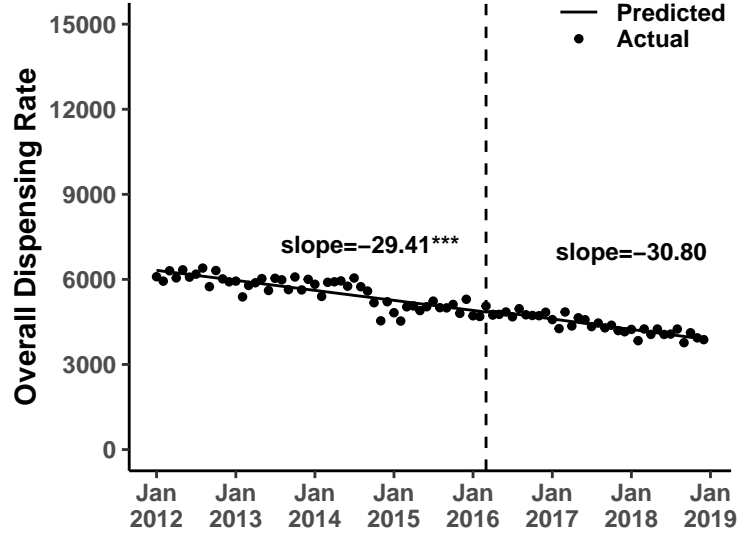

### Utah

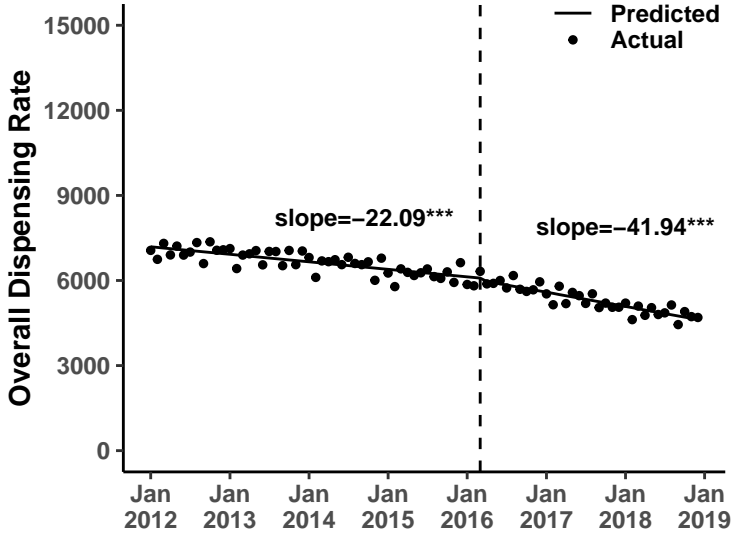

### Virginia

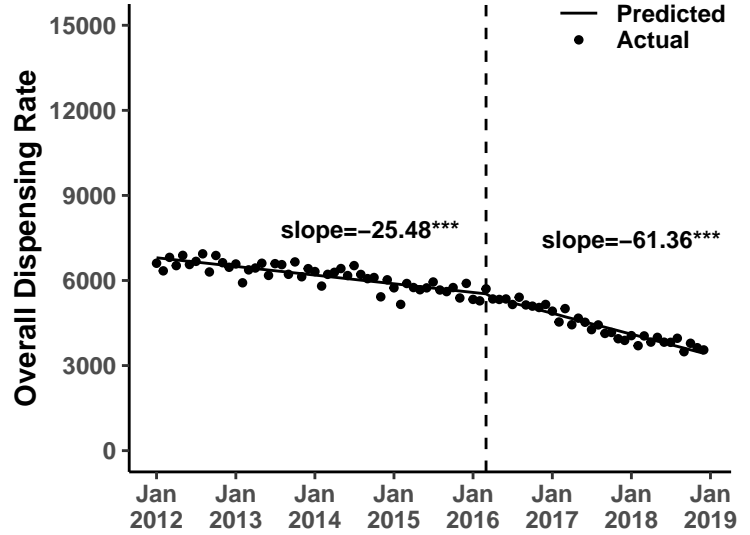

### Vermont

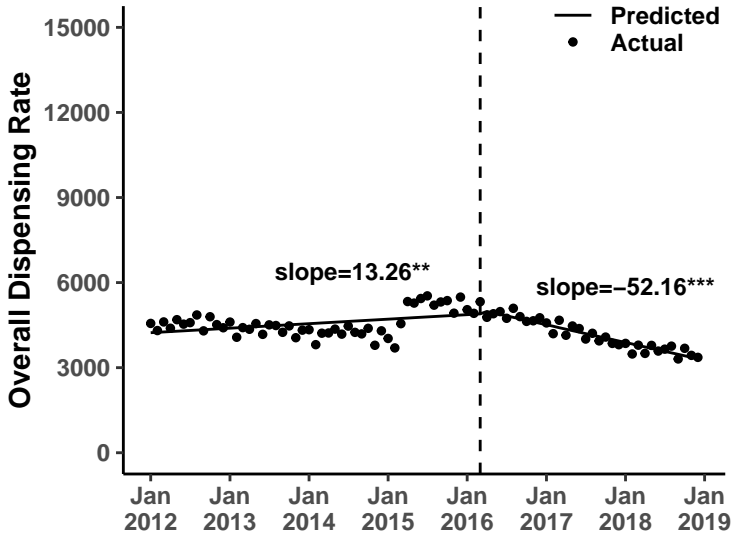

### Washington

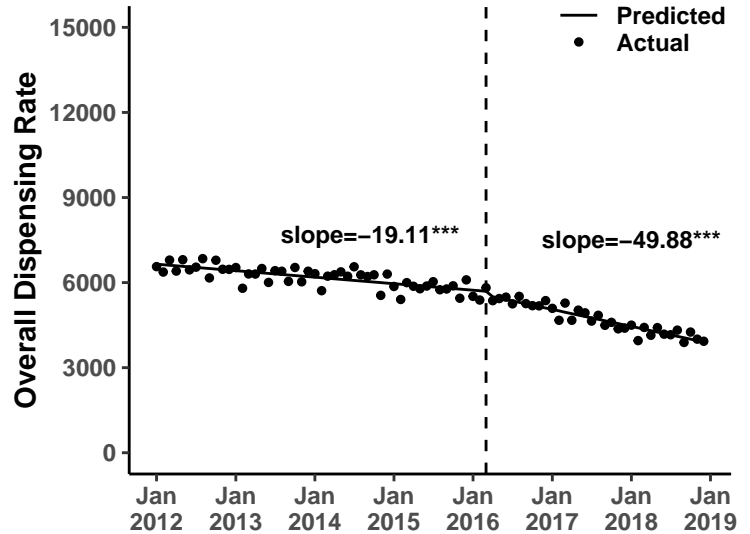

### Wisconsin

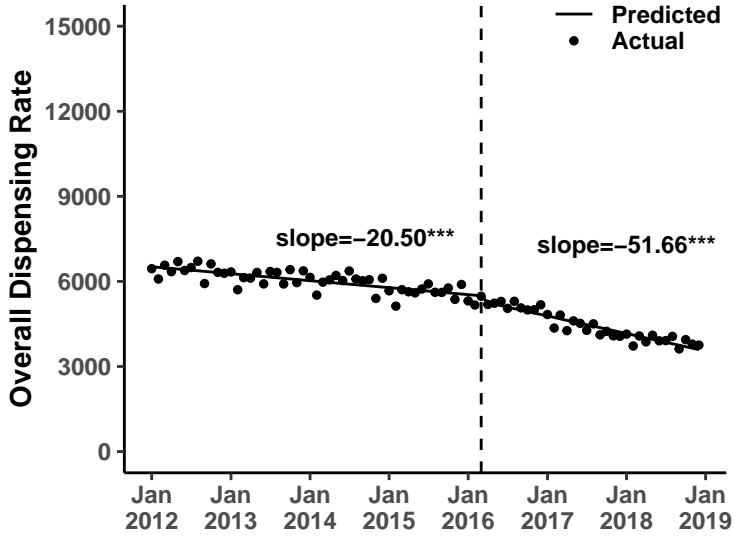

### West Virginia

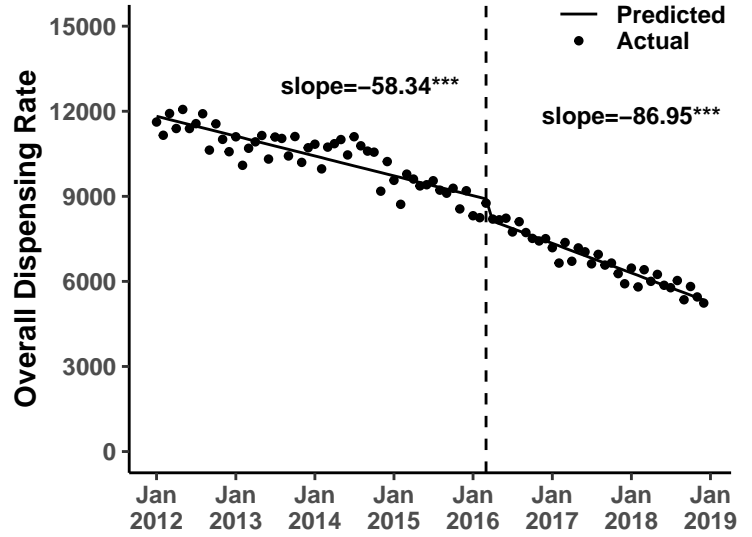

### Wyoming

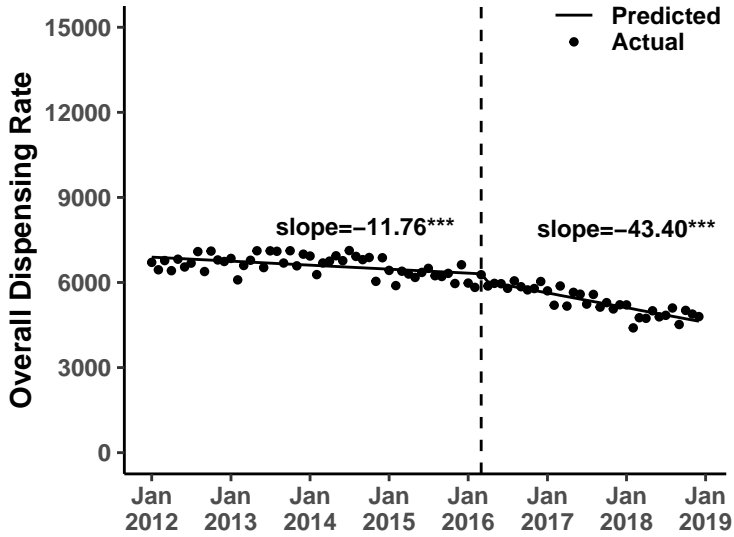

eFigure 2. Trends in the long-acting dispensing rate from 2012 through 2018, with linear regression lines showing the pre- and post-Guideline slopes superimposed

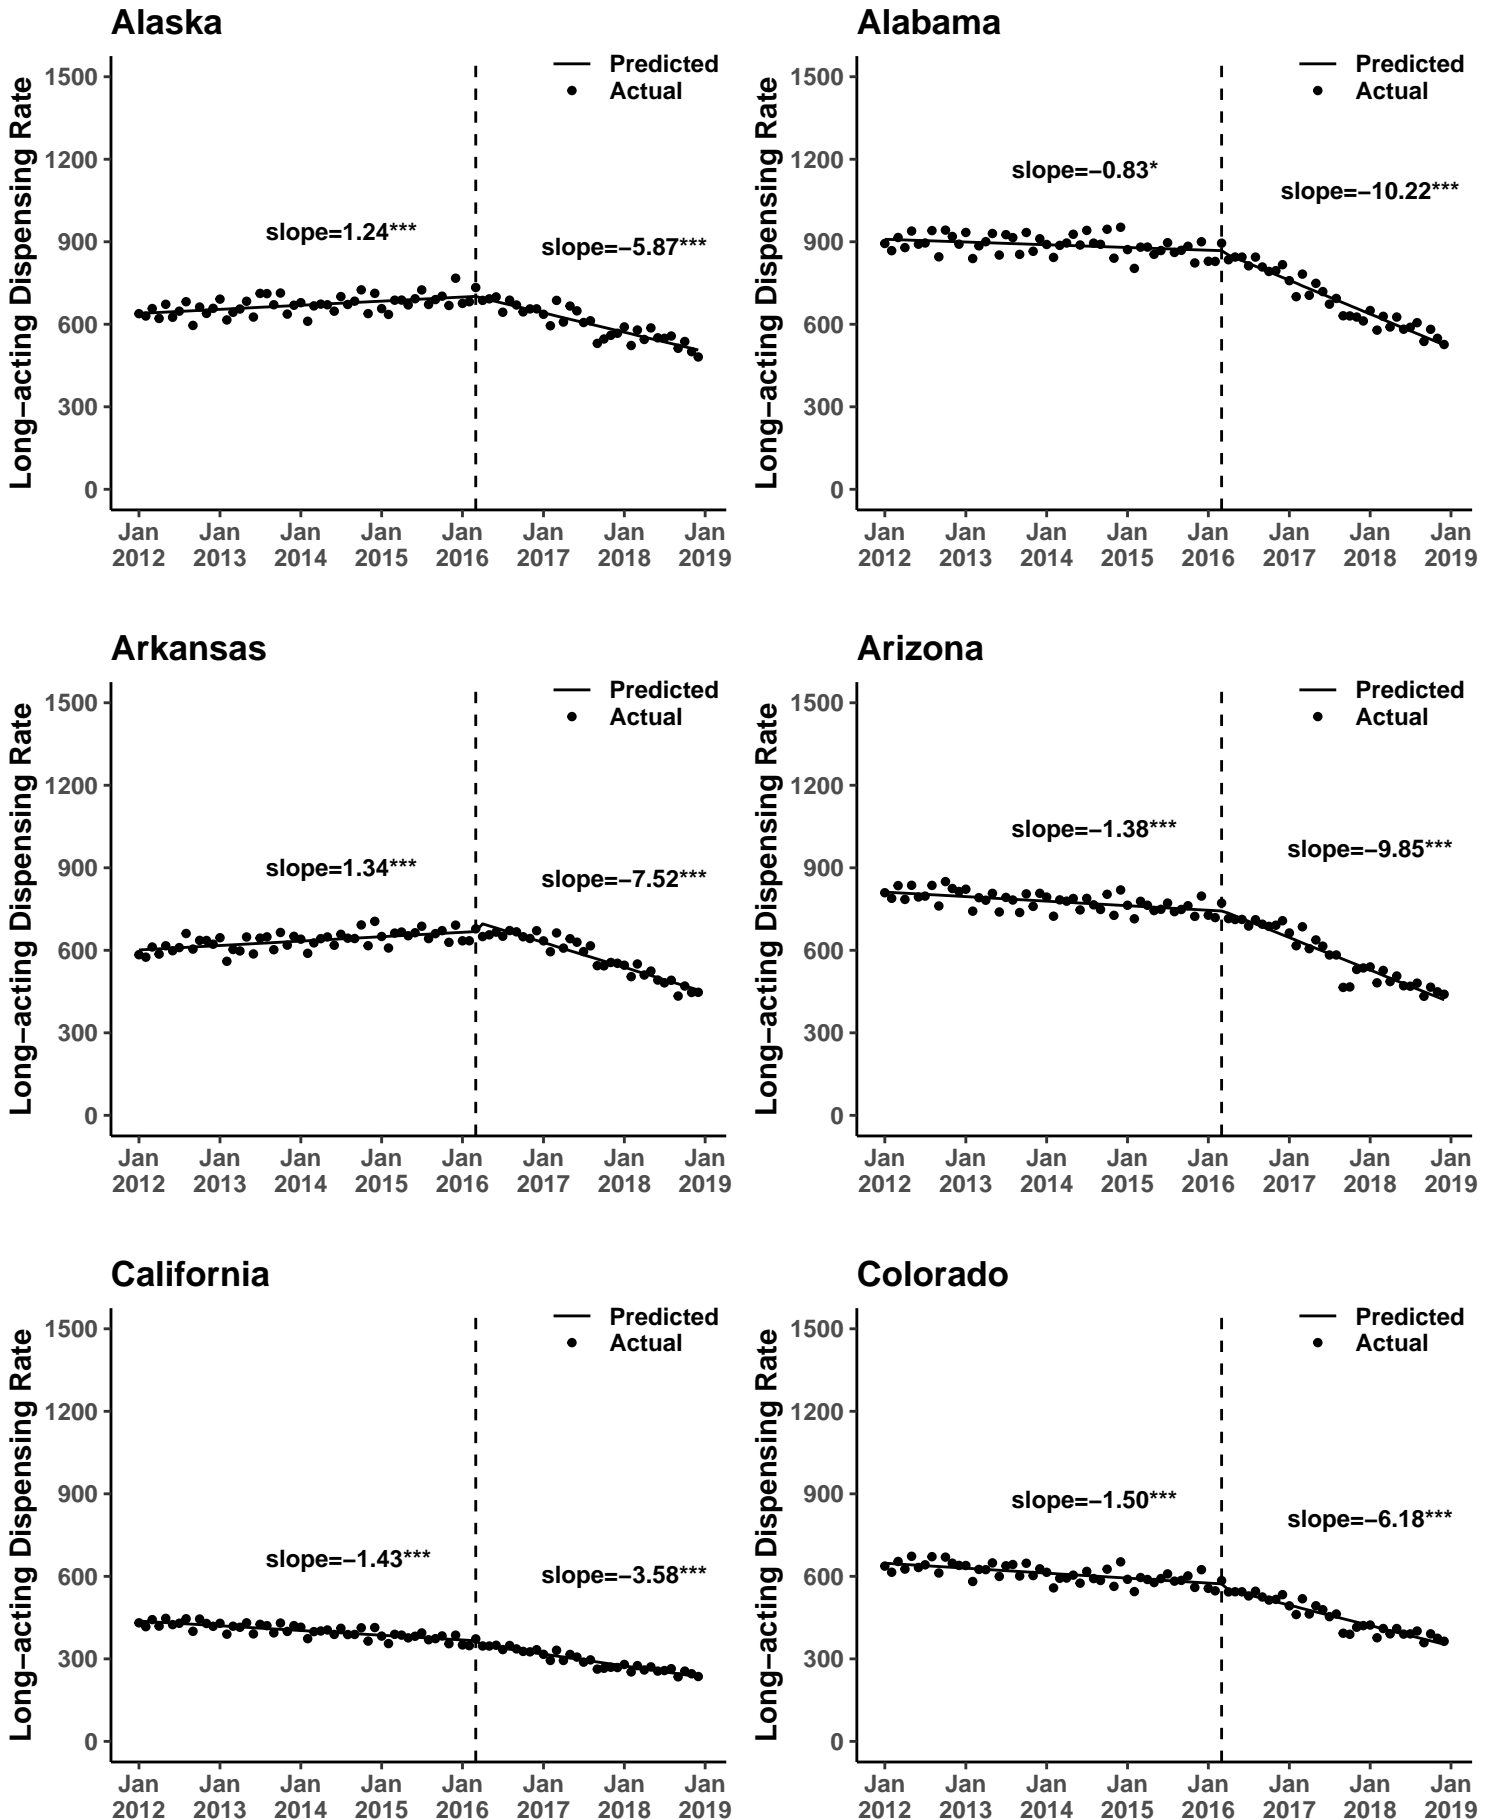

Connecticut

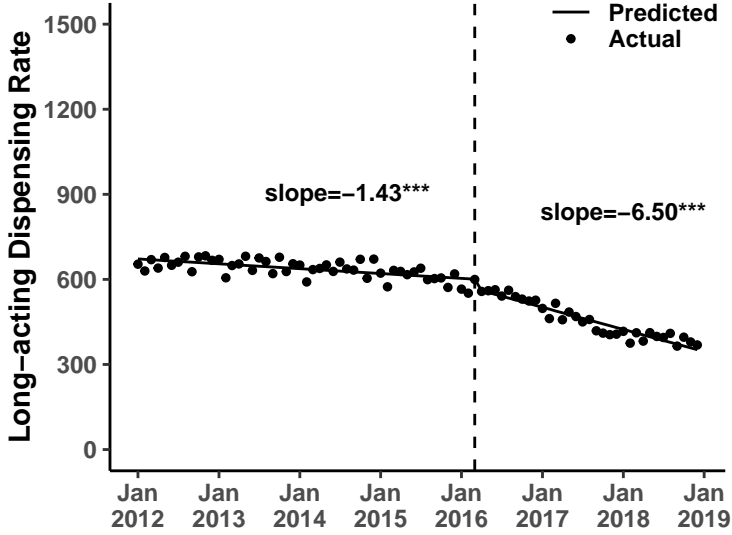

District of Columbia

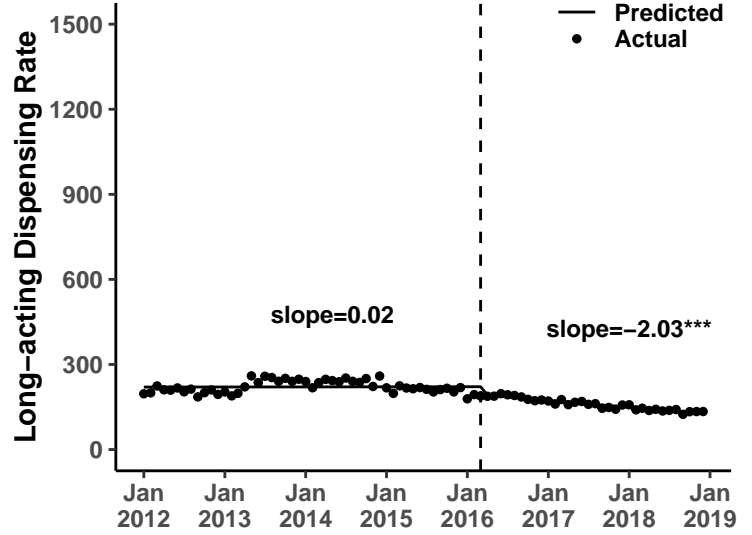

Delaware

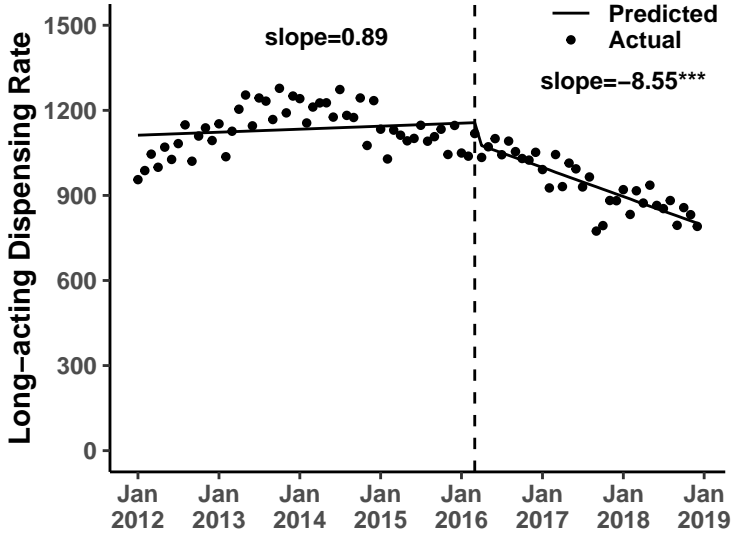

Florida

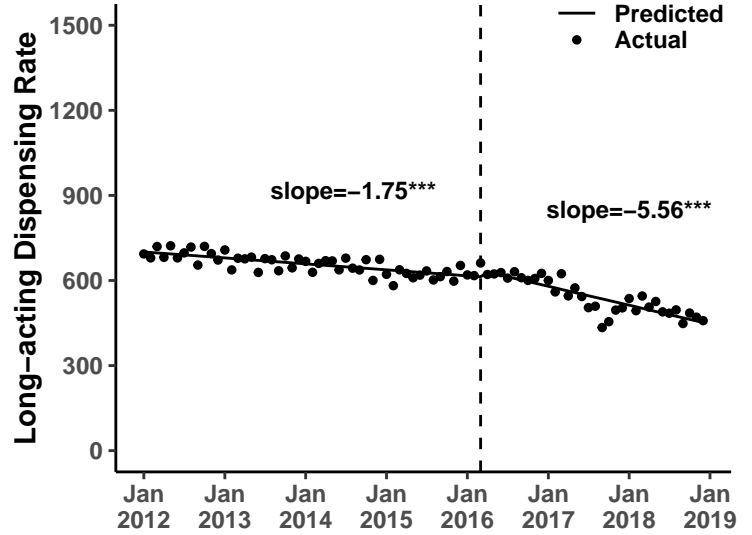

Georgia

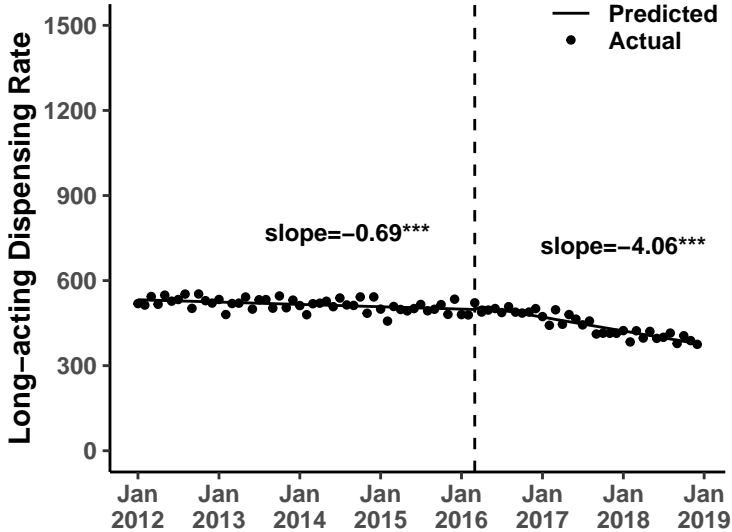

Hawaii

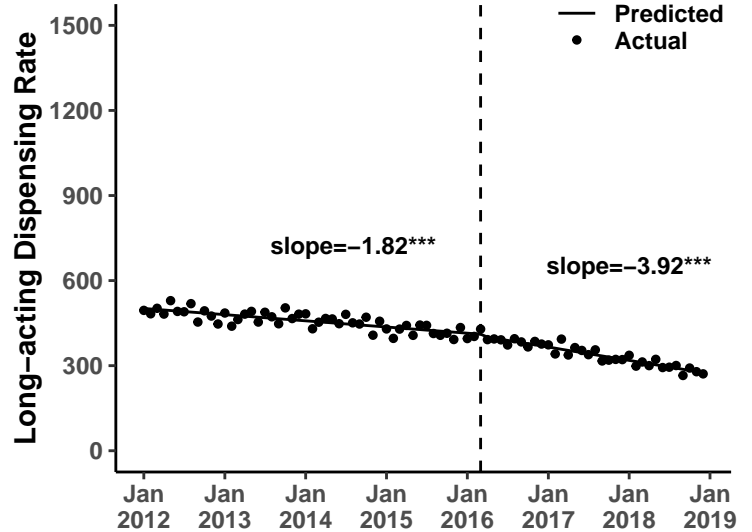

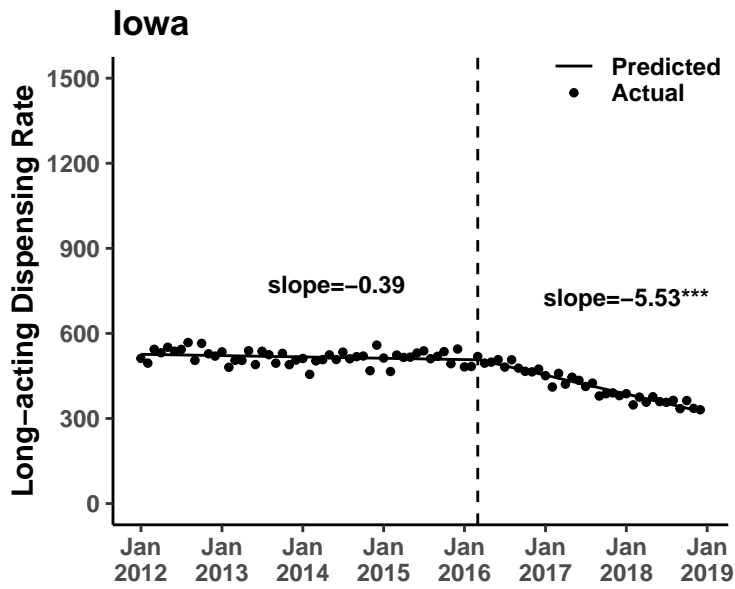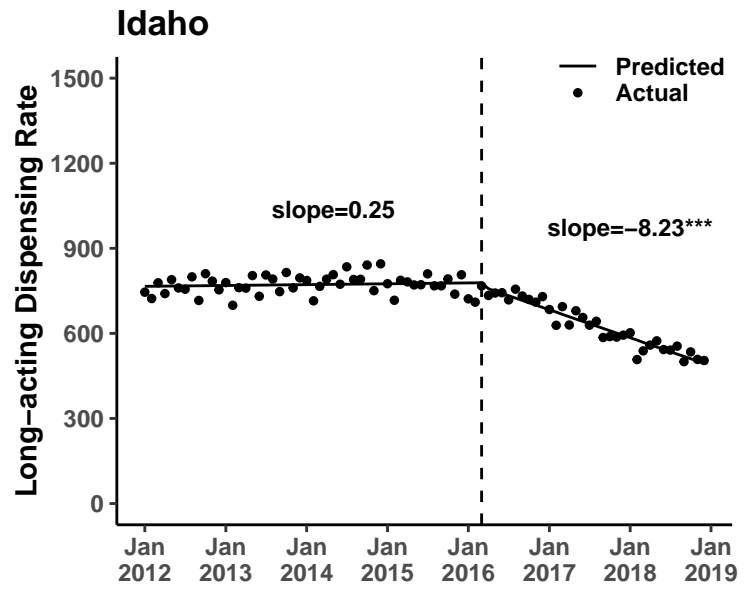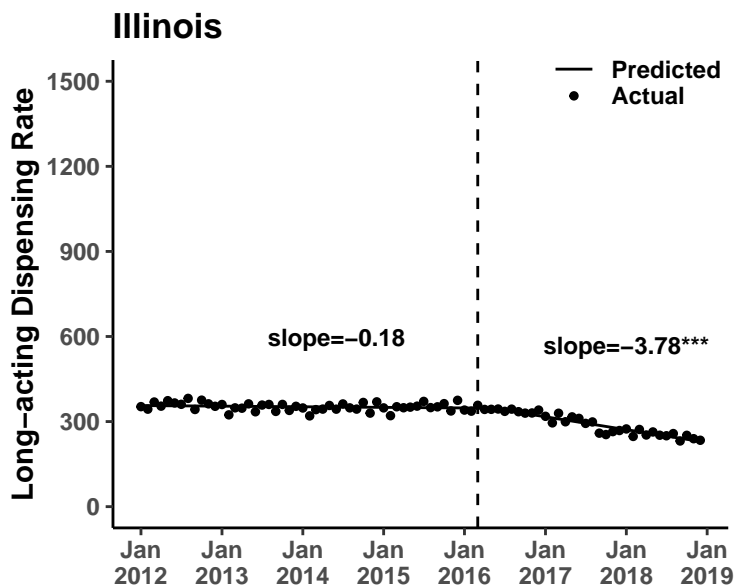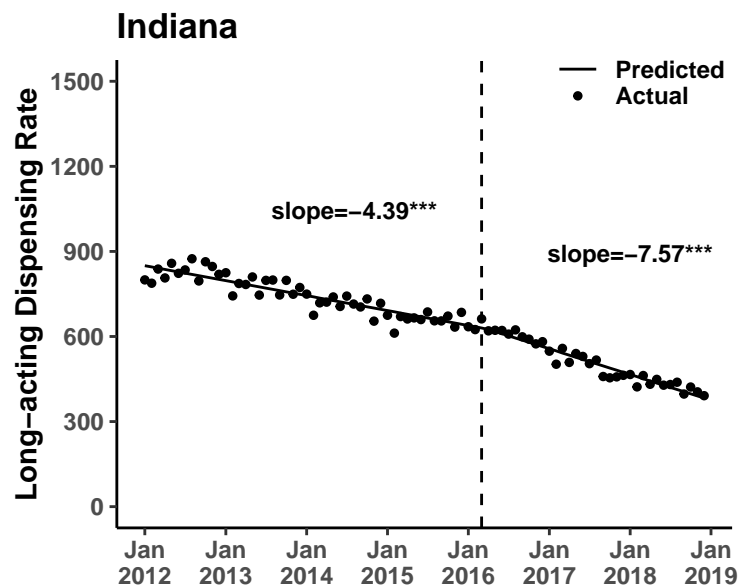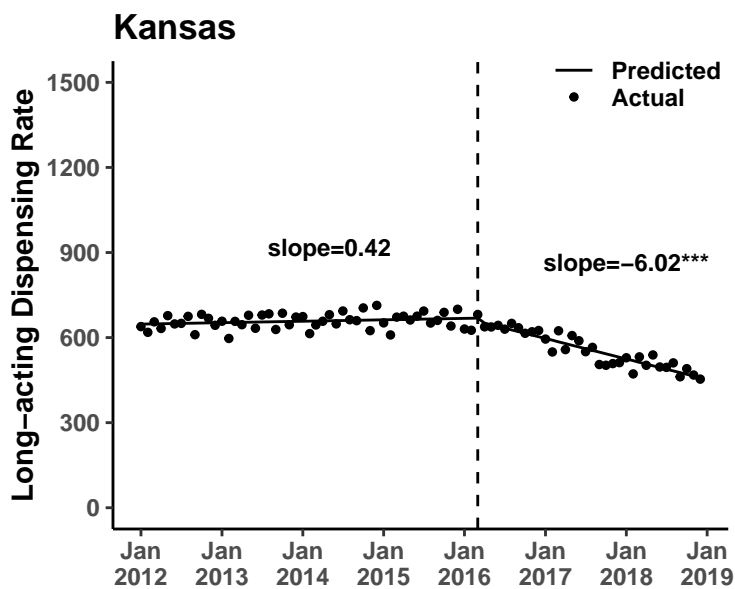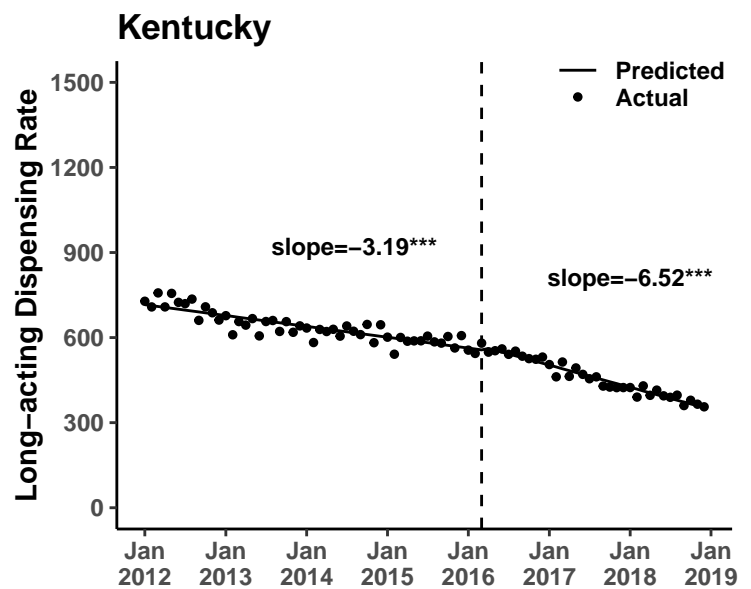

### Louisiana

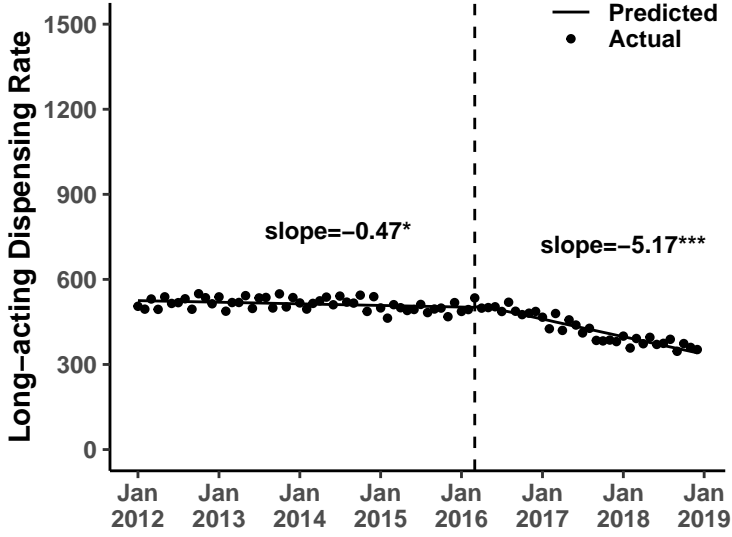

### Massachusetts

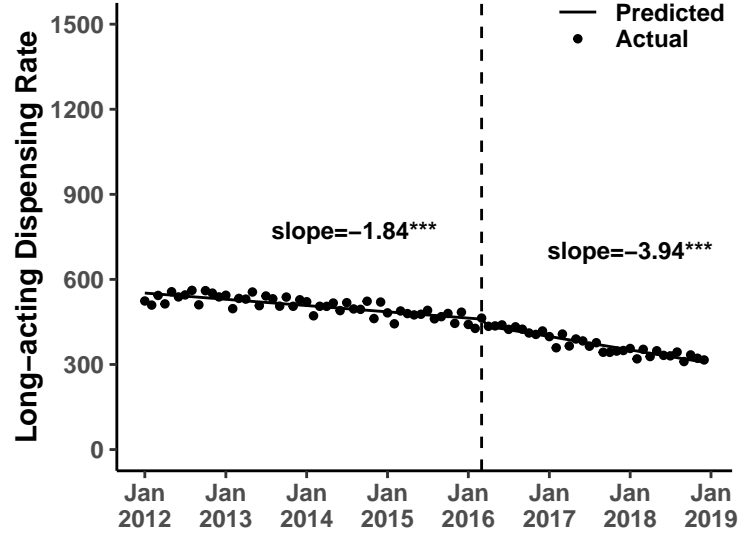

### Maryland

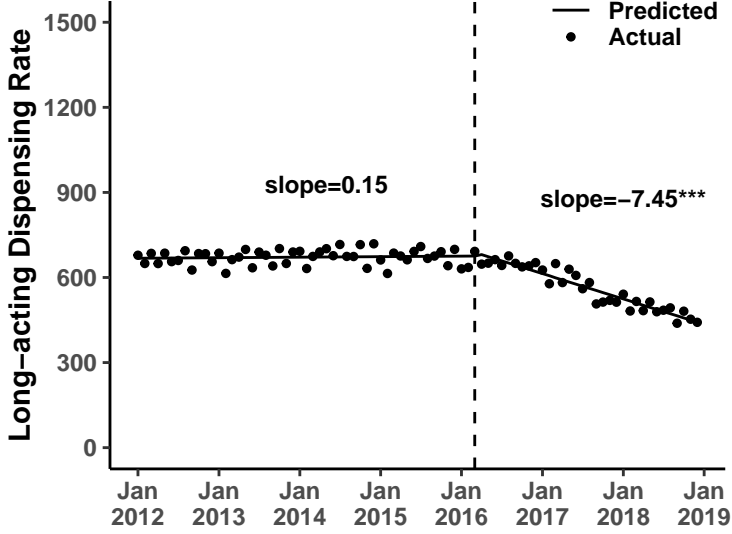

### Maine

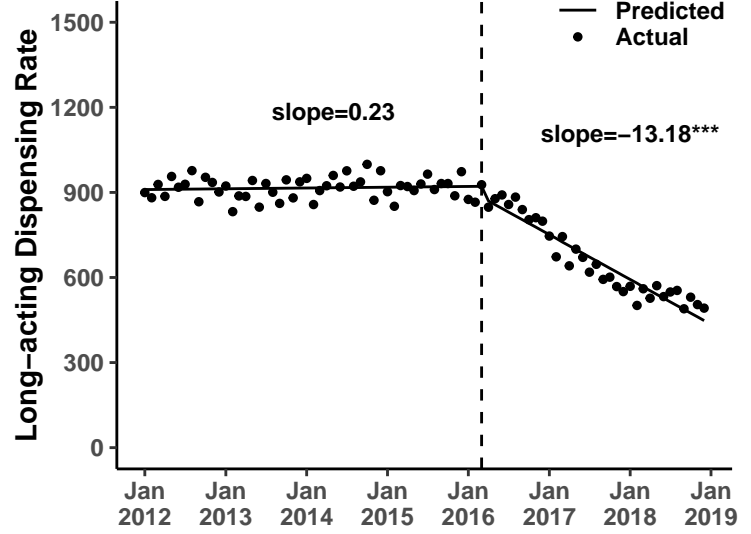

### Michigan

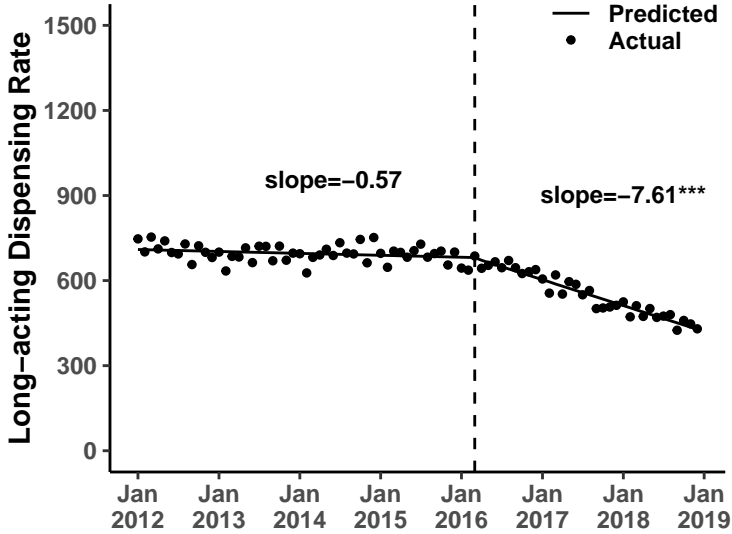

### Minnesota

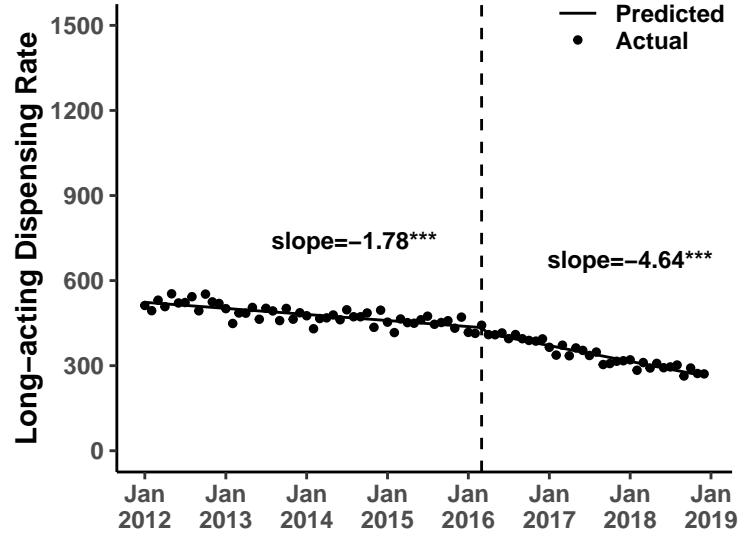



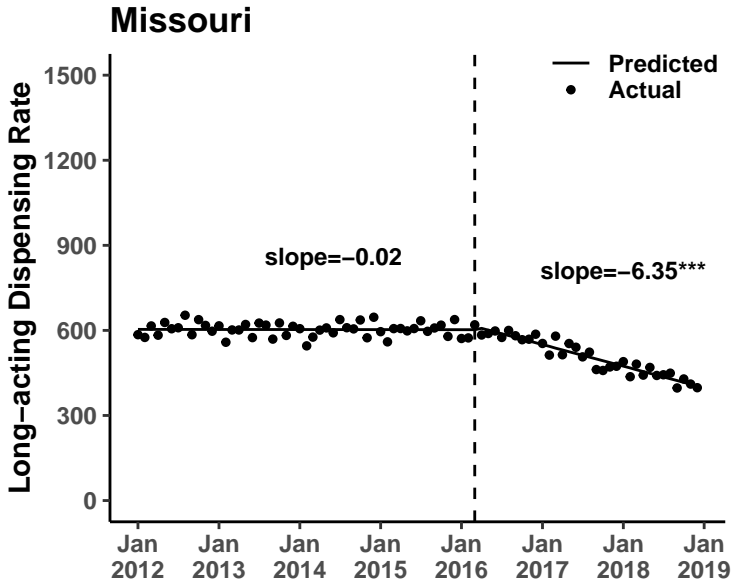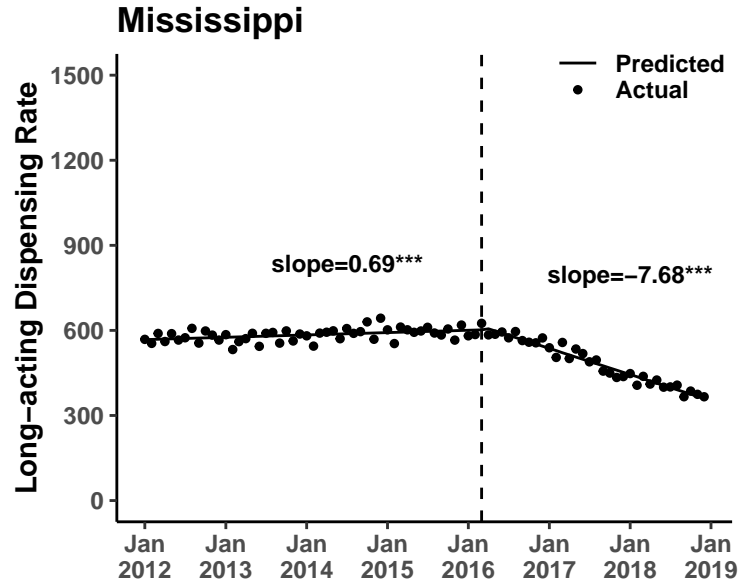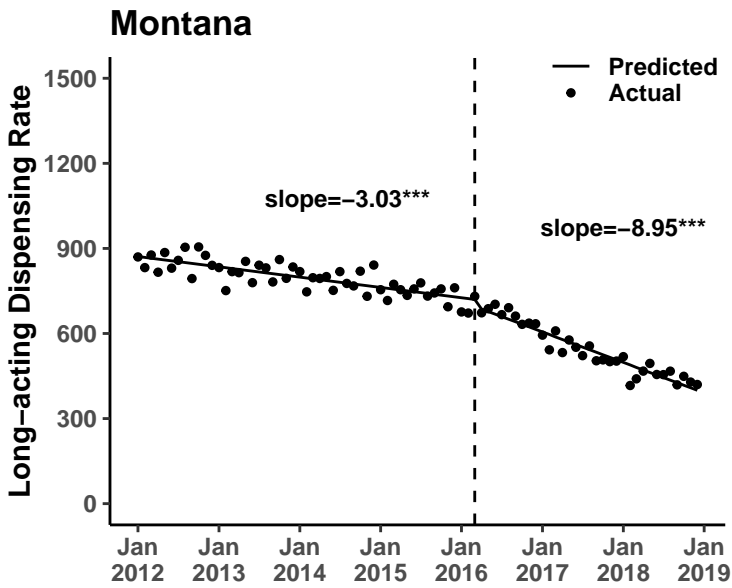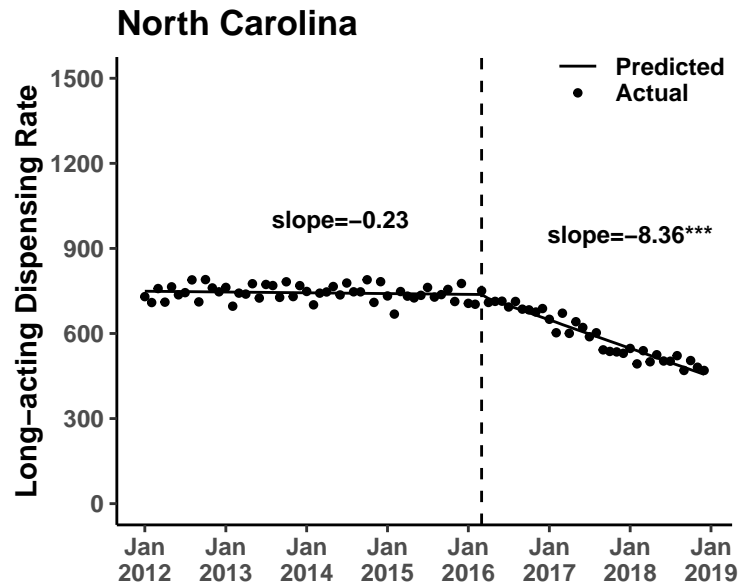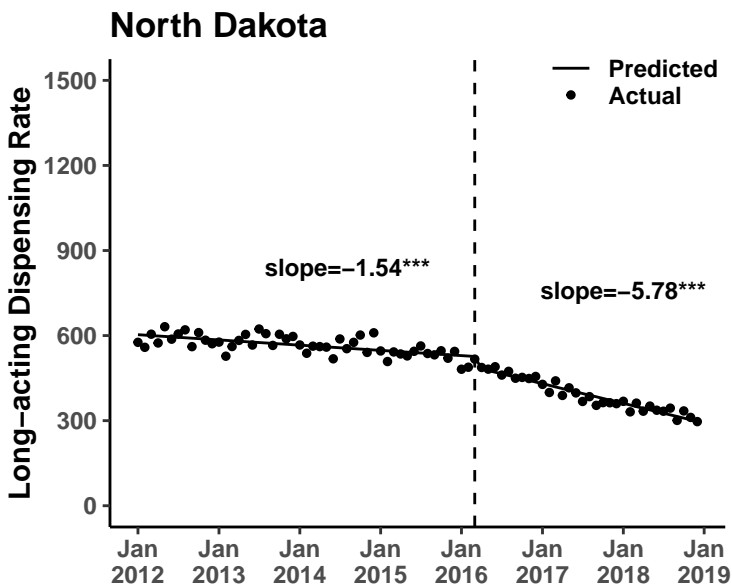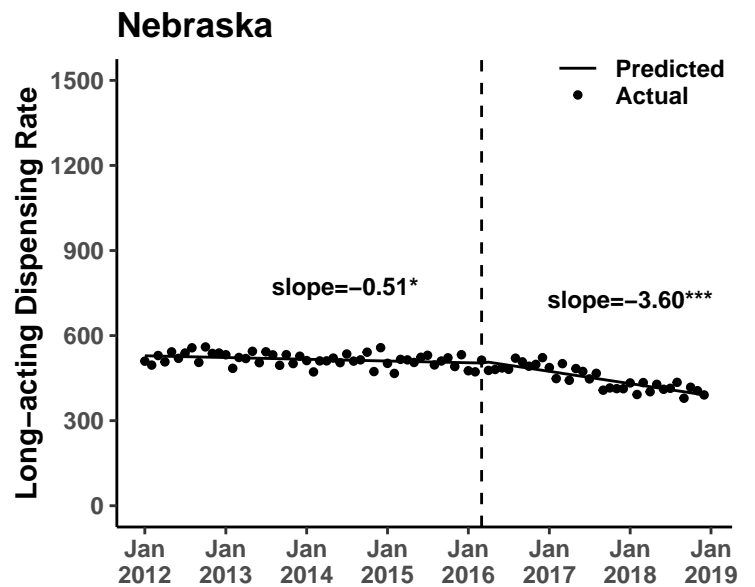

### New Hampshire

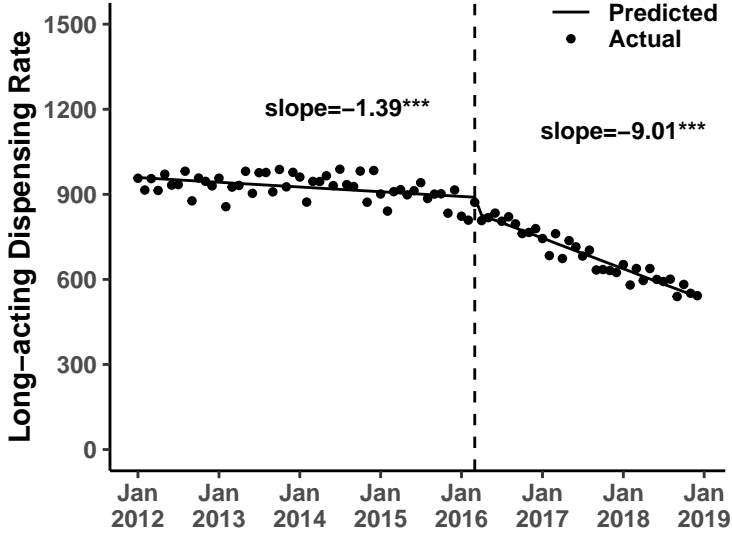

### New Jersey

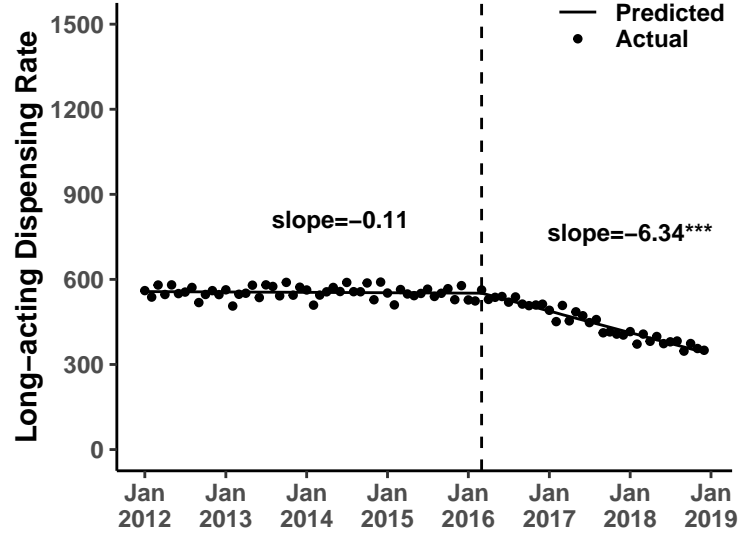

### New Mexico

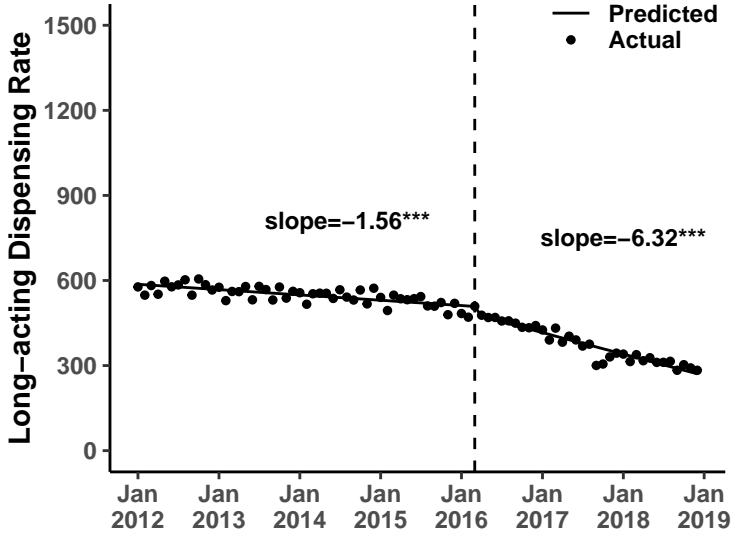

### Nevada

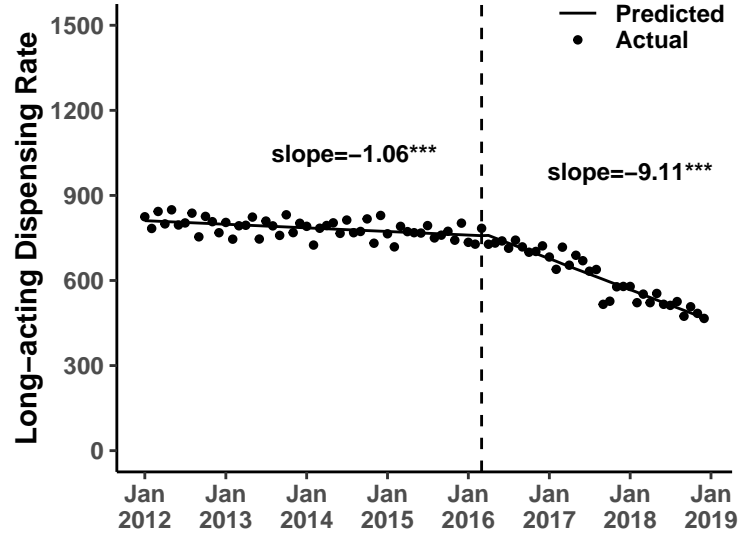

### New York

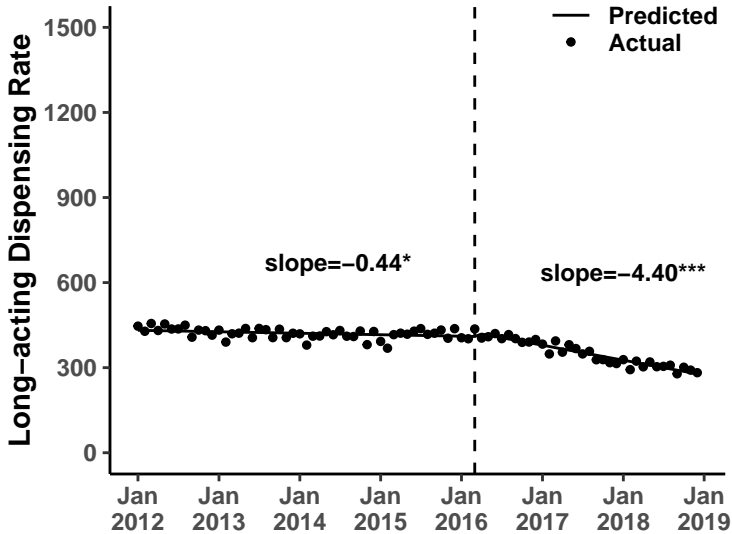

### Ohio

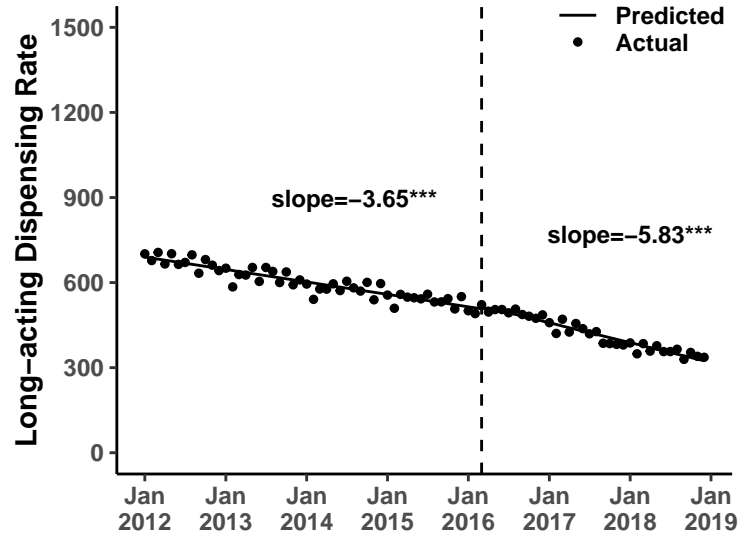

### Oklahoma

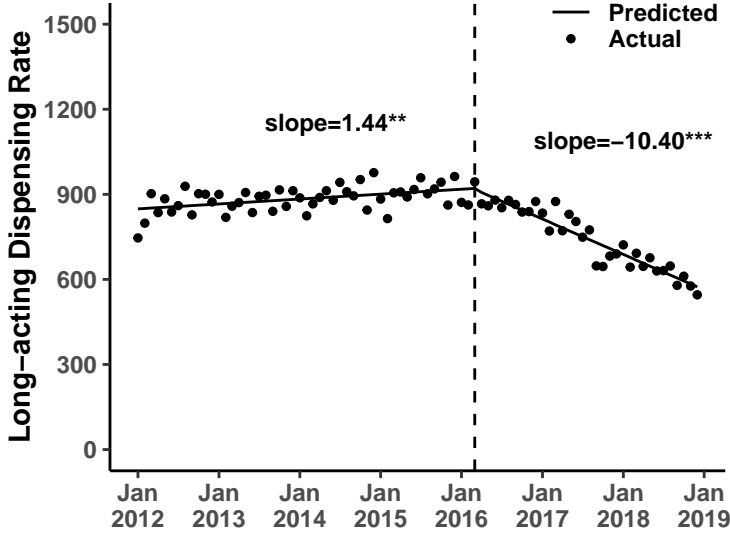

### Oregon

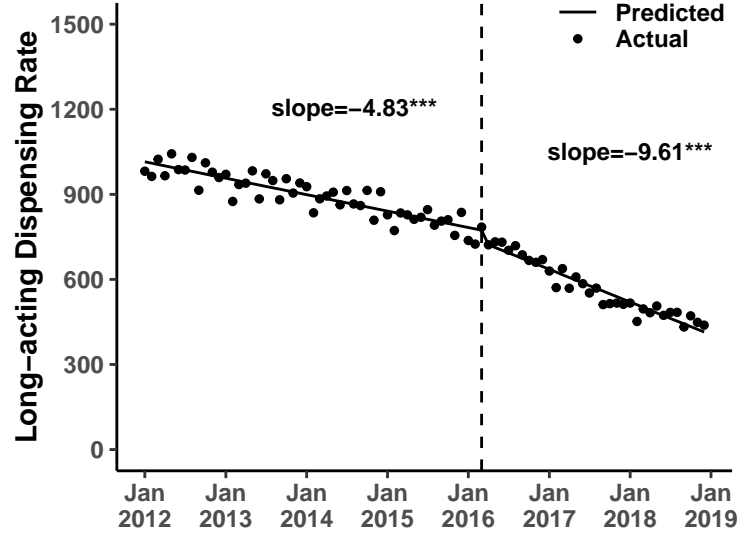

### Pennsylvania

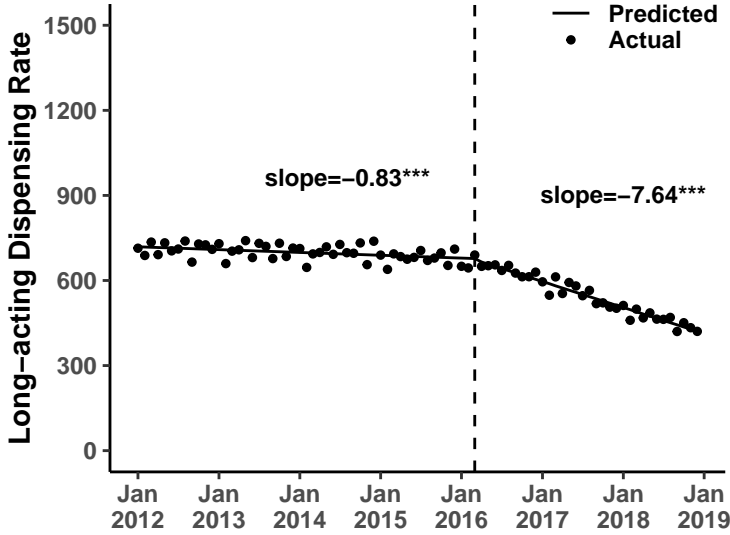

### Rhode Island

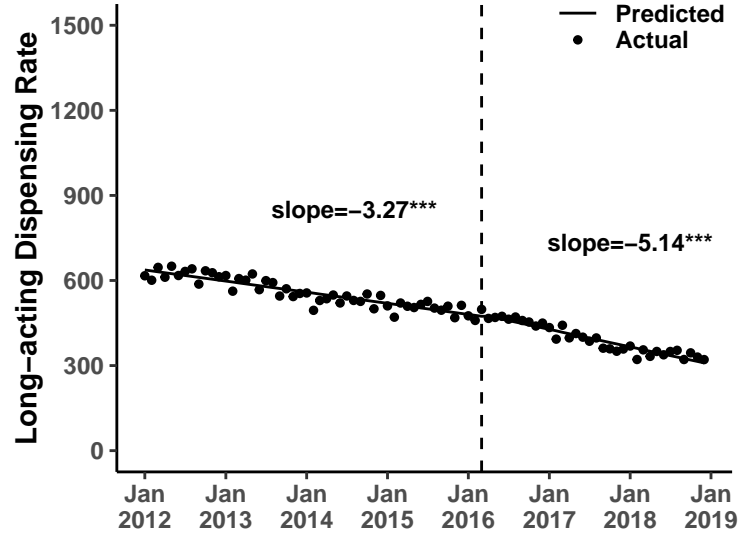

### South Carolina

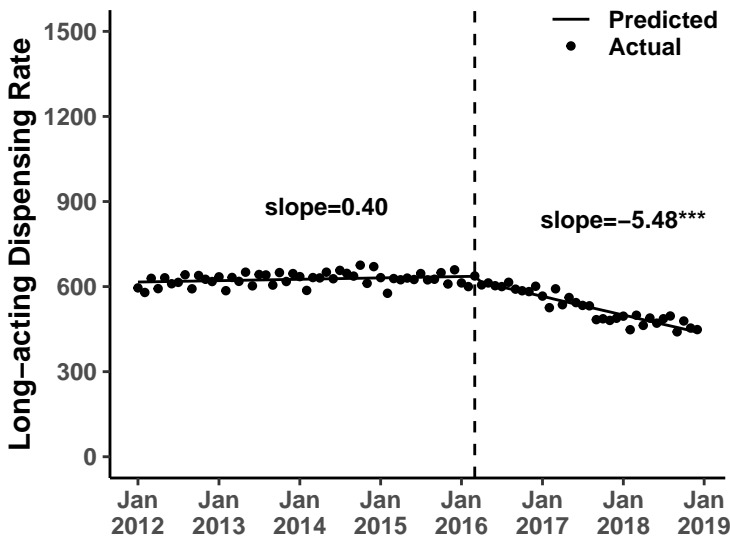

### South Dakota

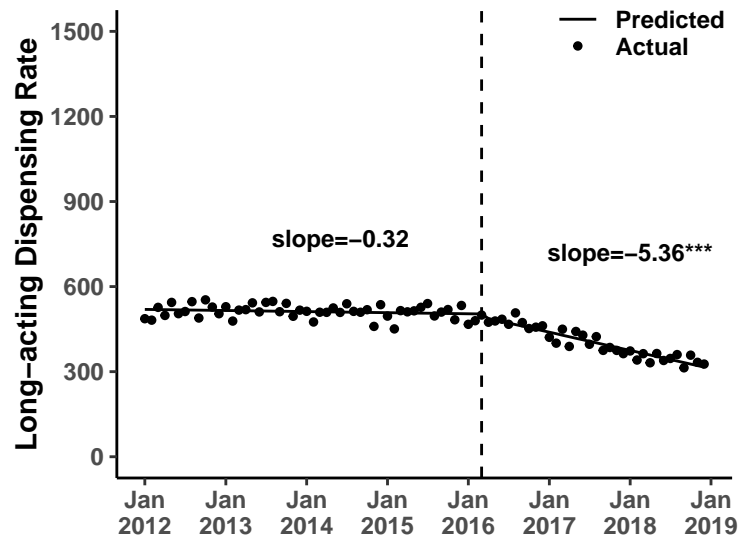

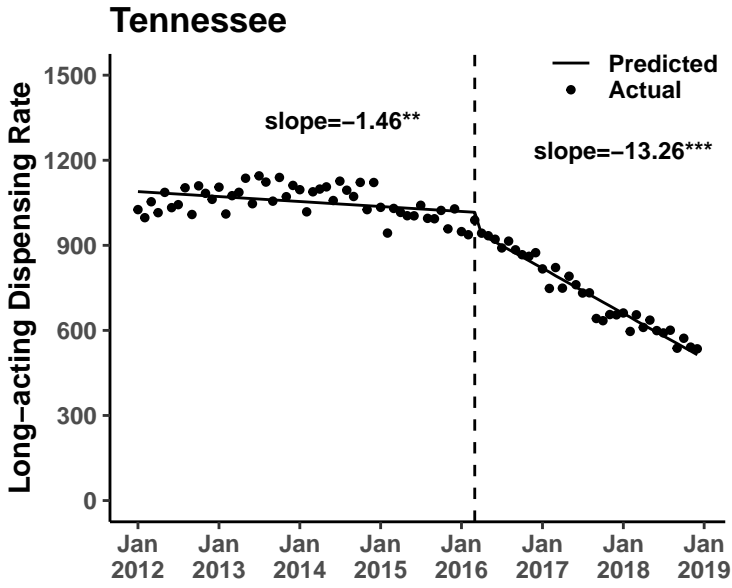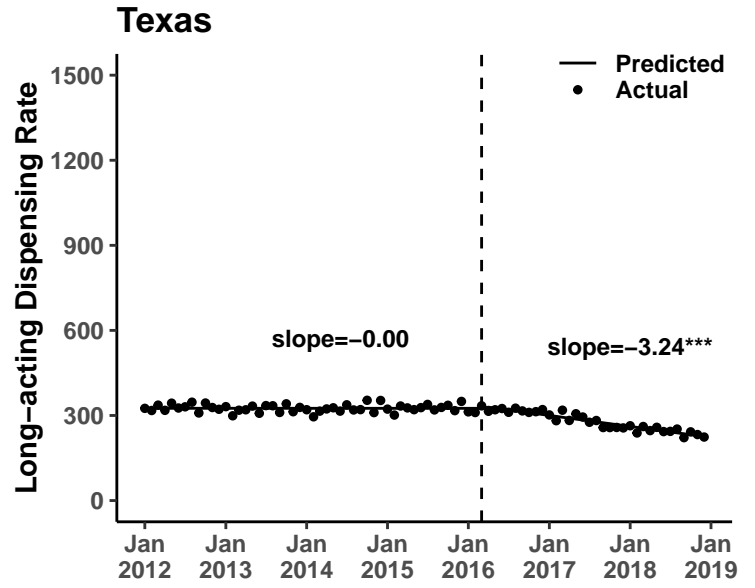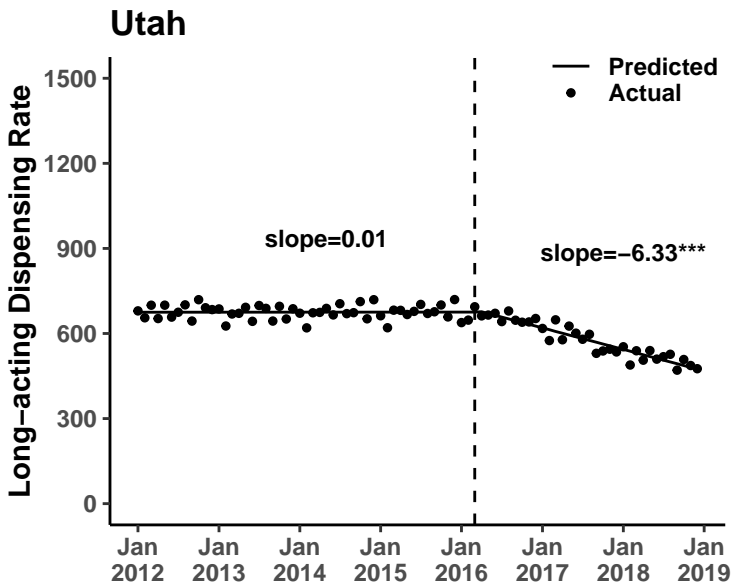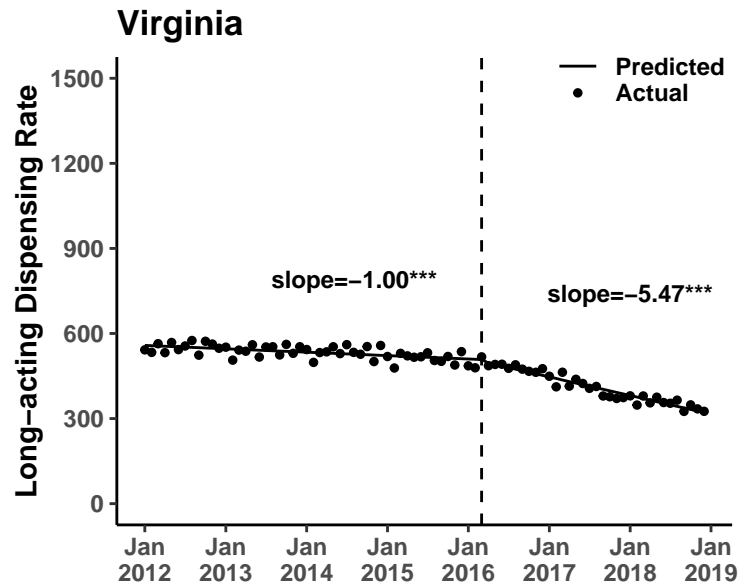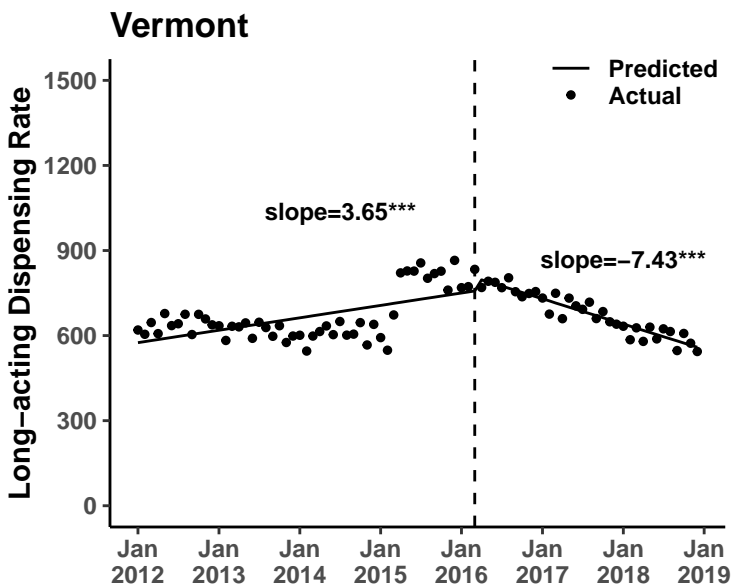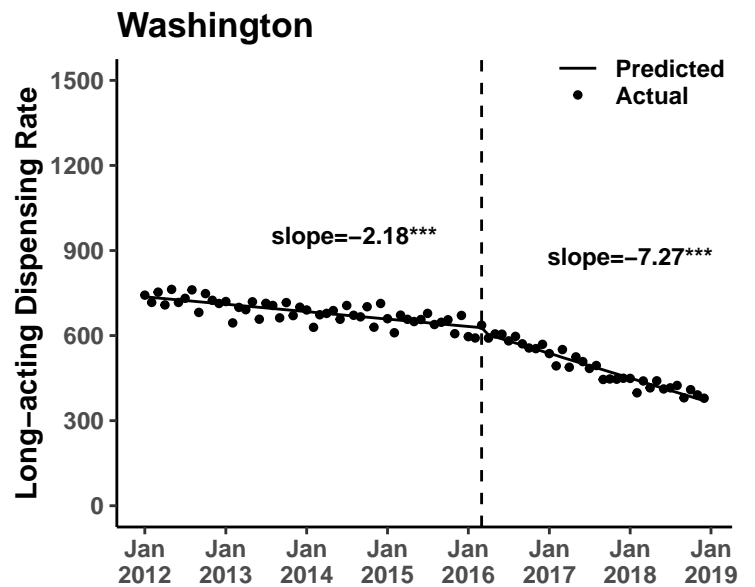

### Wisconsin

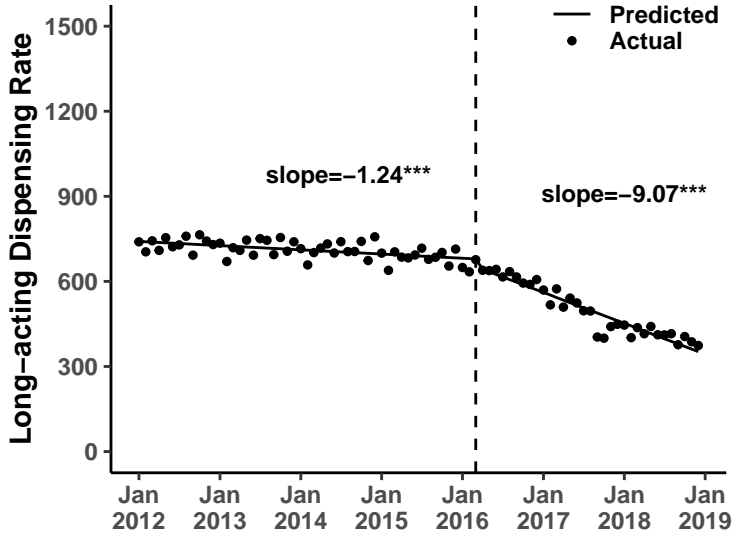

### West Virginia

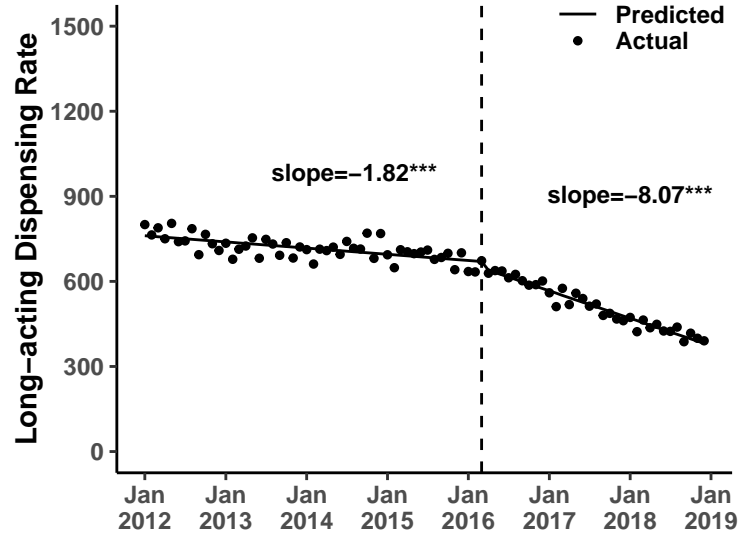

### Wyoming

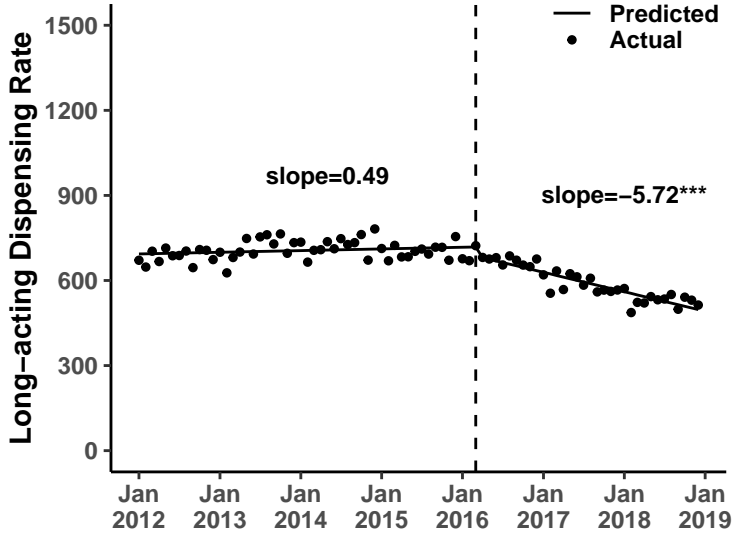

**eFigure 3. Trends in the high-dose ( $\geq 90$  MME/Day) dispensing rate from 2012 through 2018, with linear regression lines showing the pre- and post-Guideline slopes superimposed**

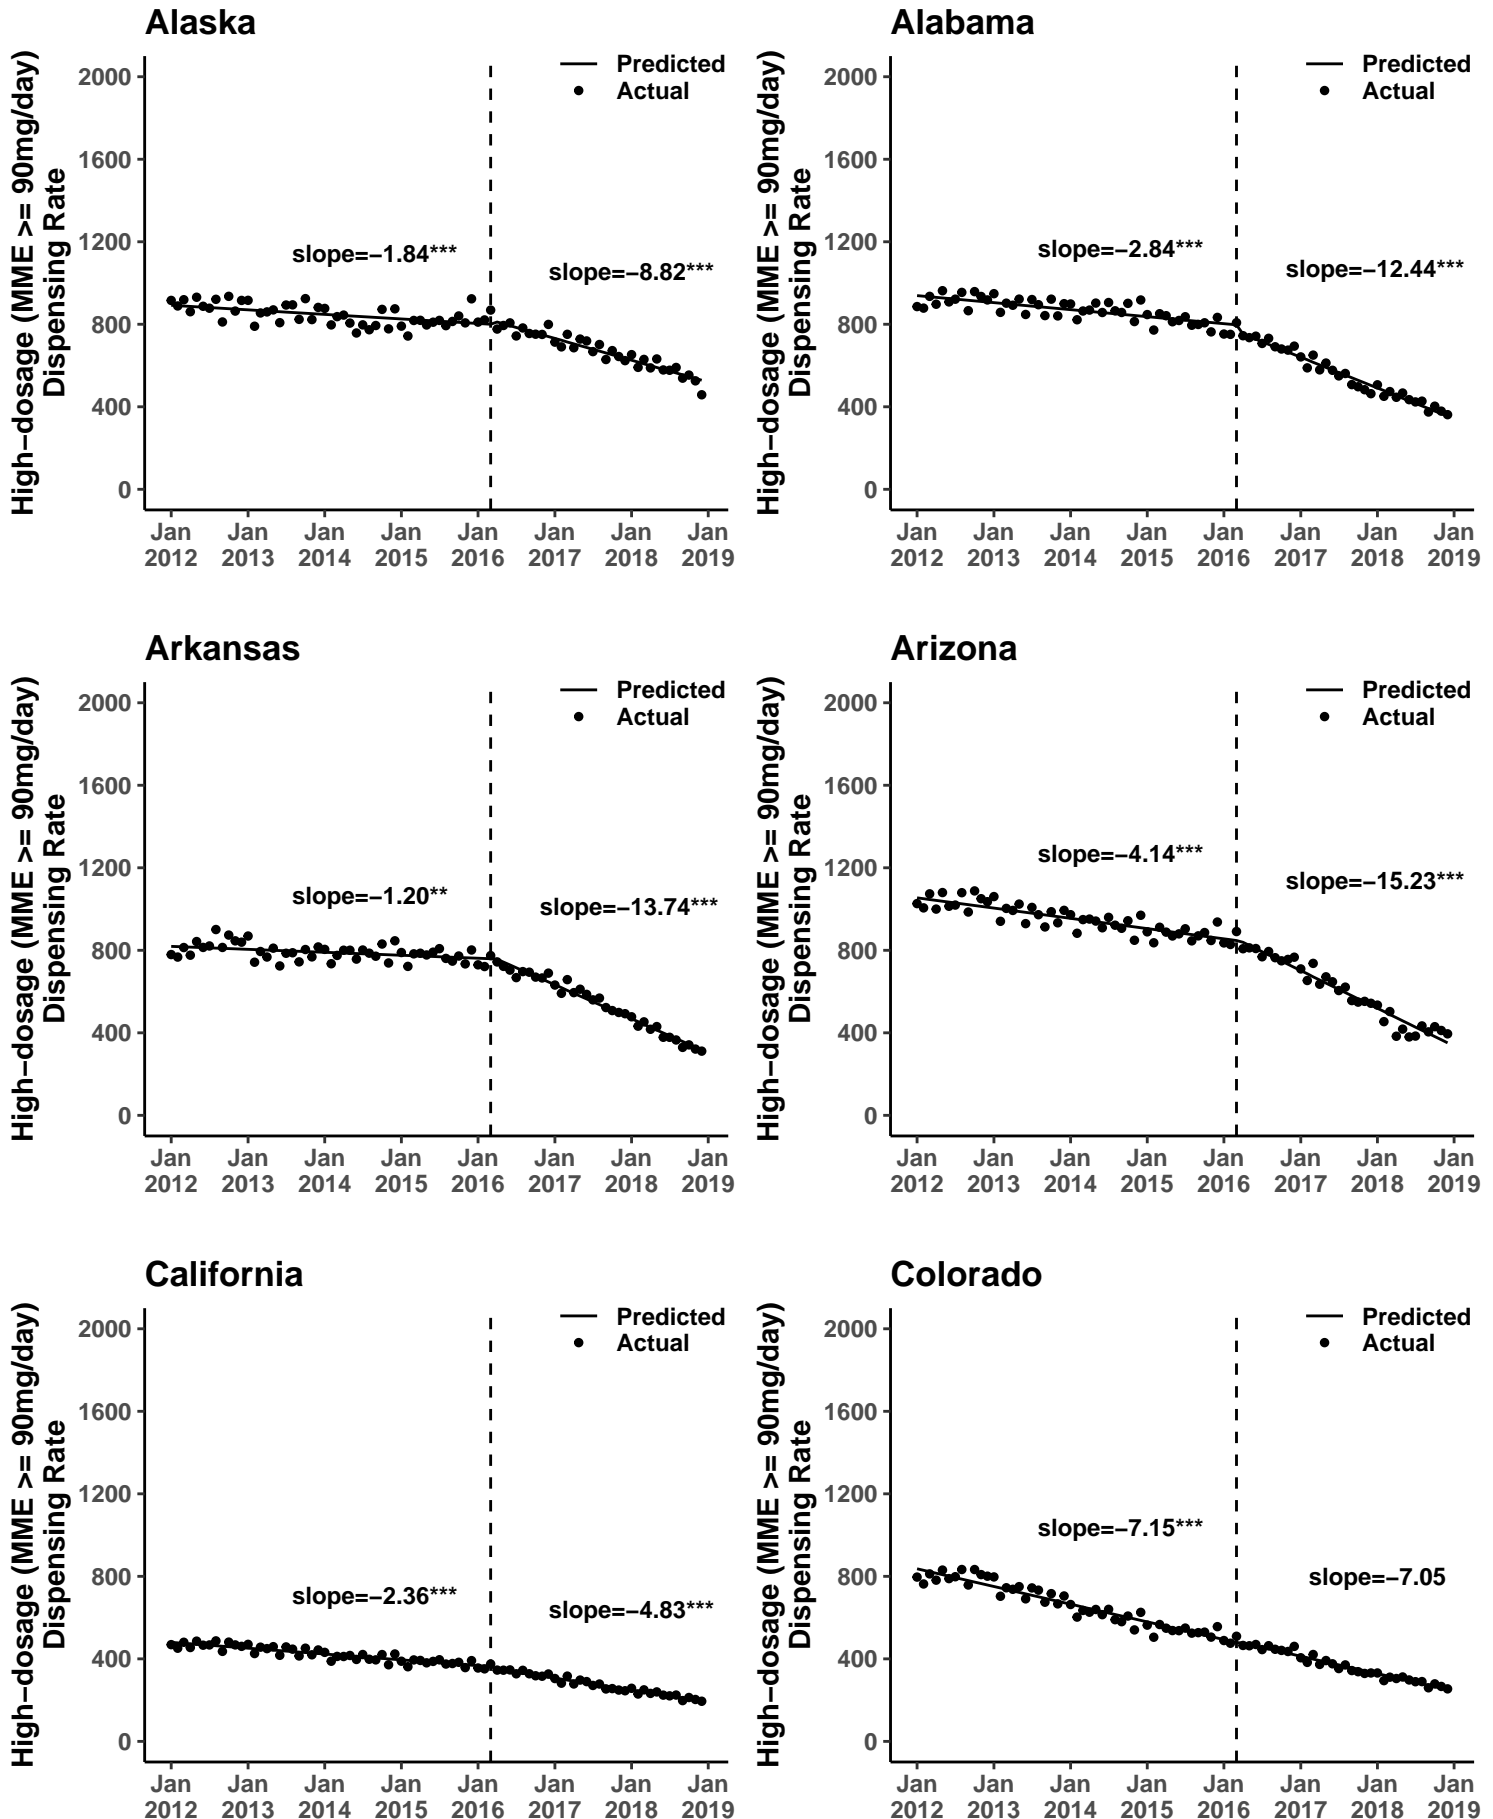

### Connecticut

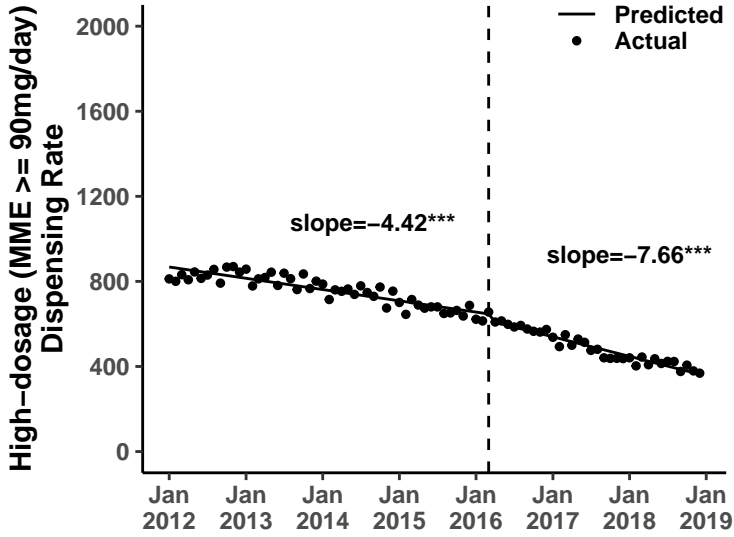

### District of Columbia

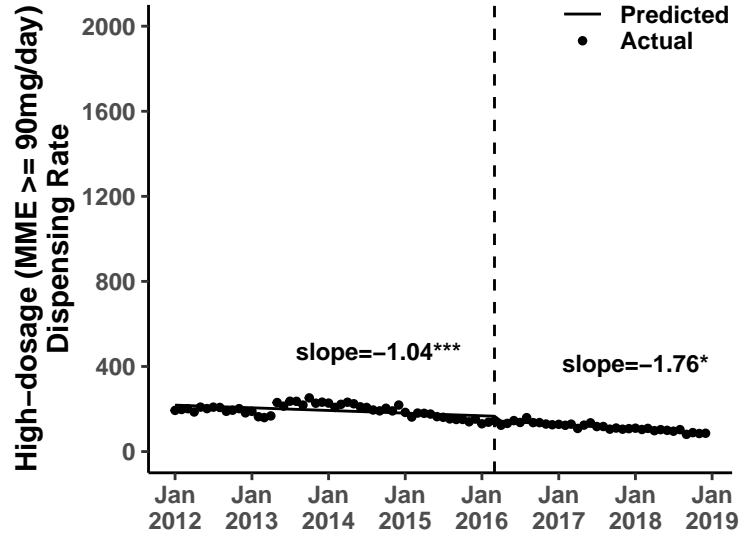

### Delaware

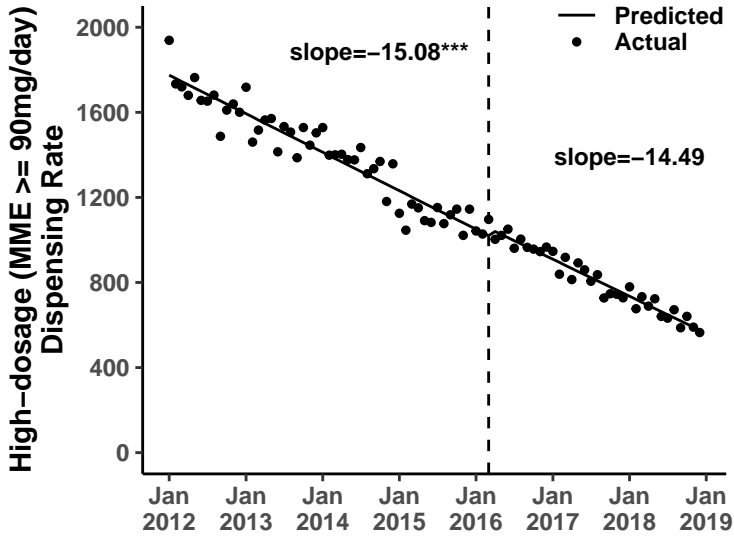

### Florida

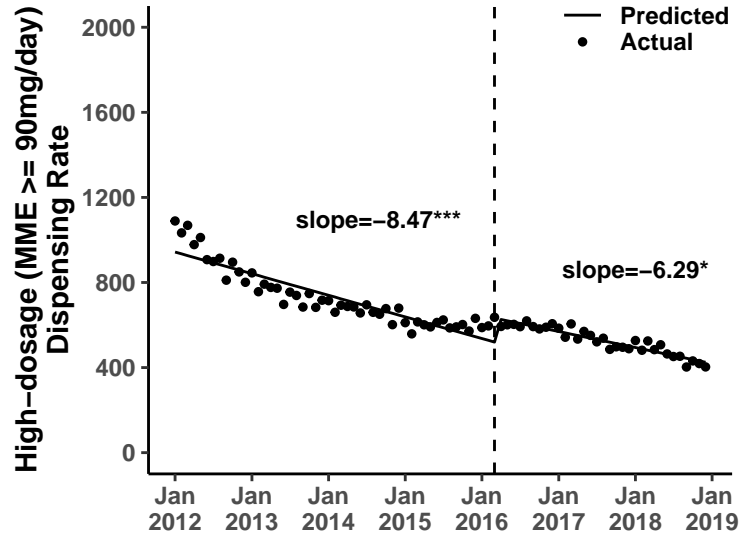

### Georgia

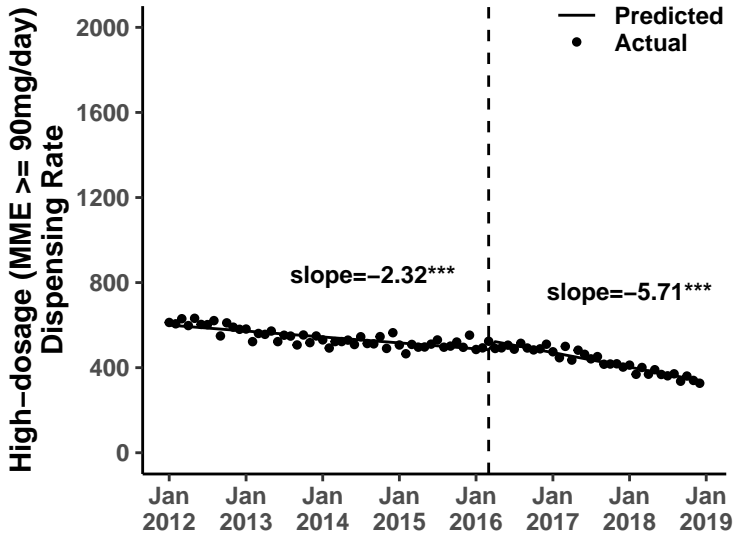

### Hawaii

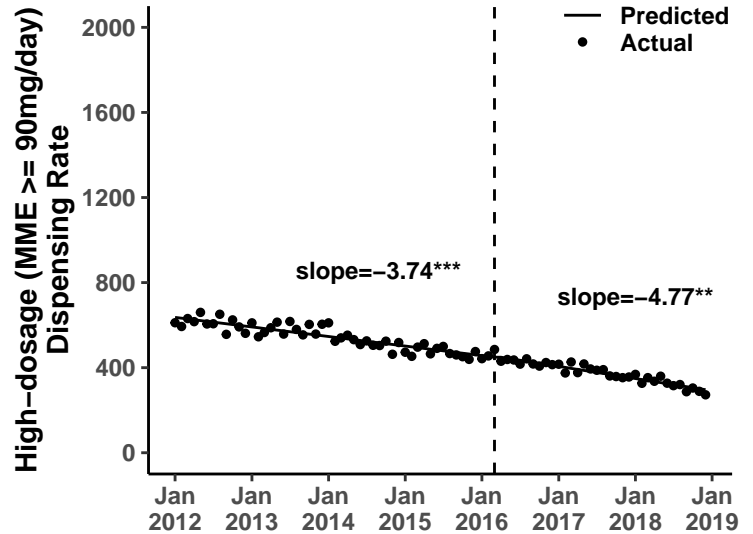

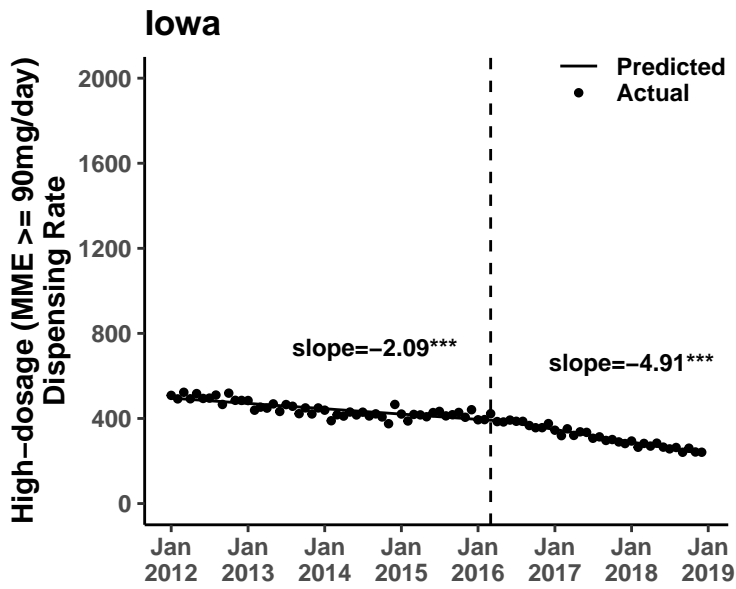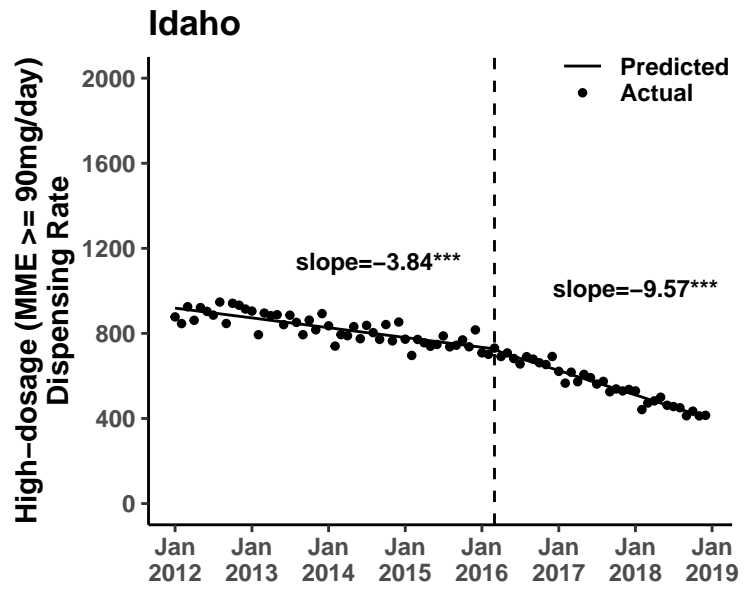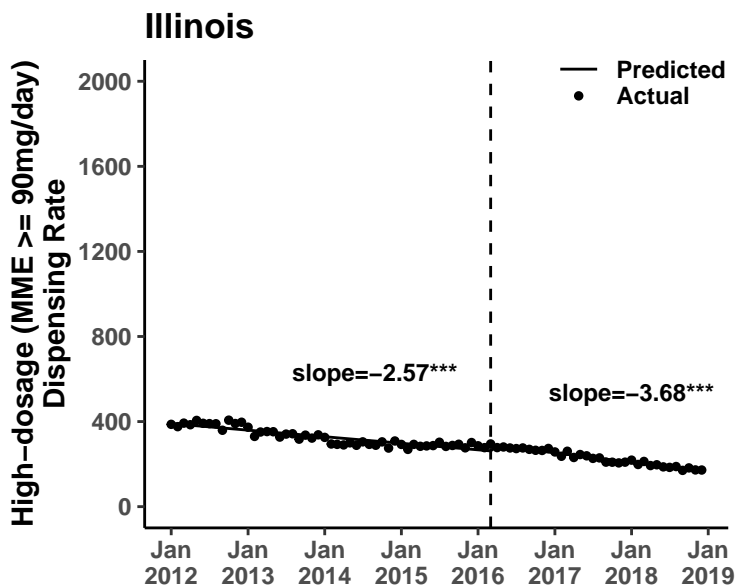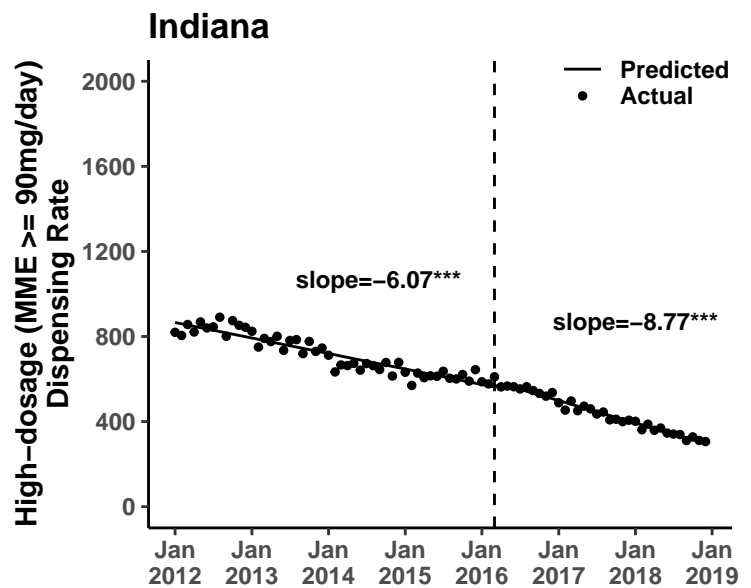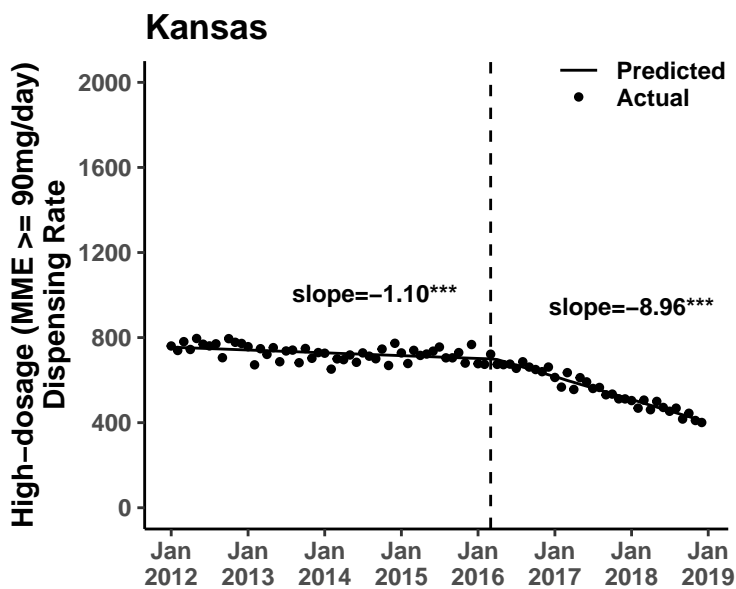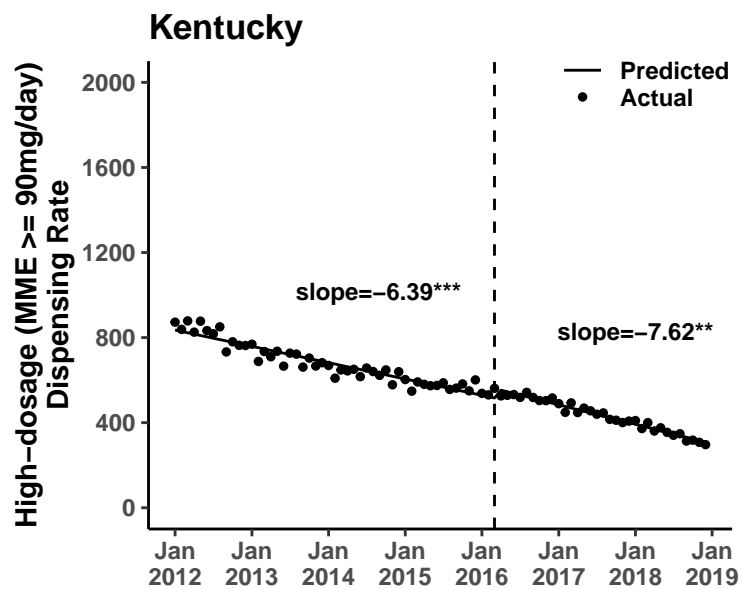



### Louisiana

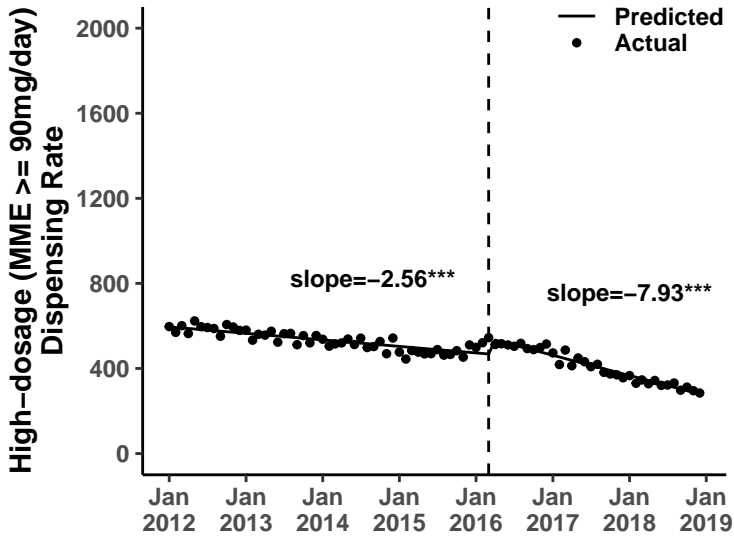

### Massachusetts

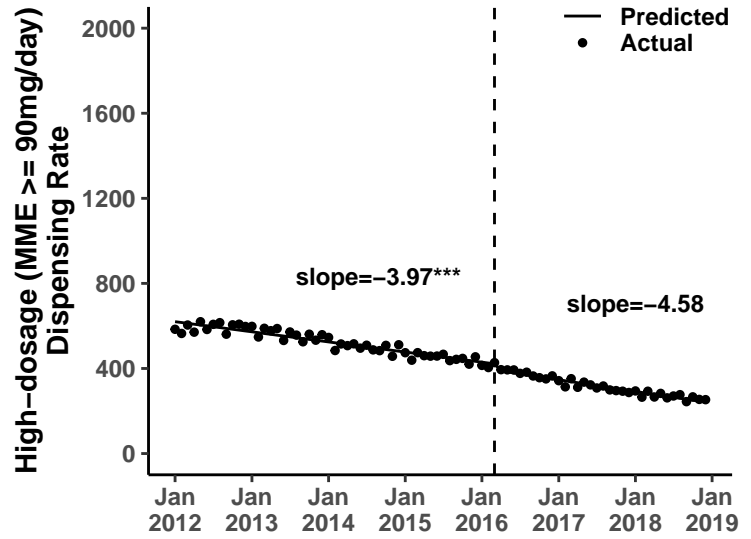

### Maryland

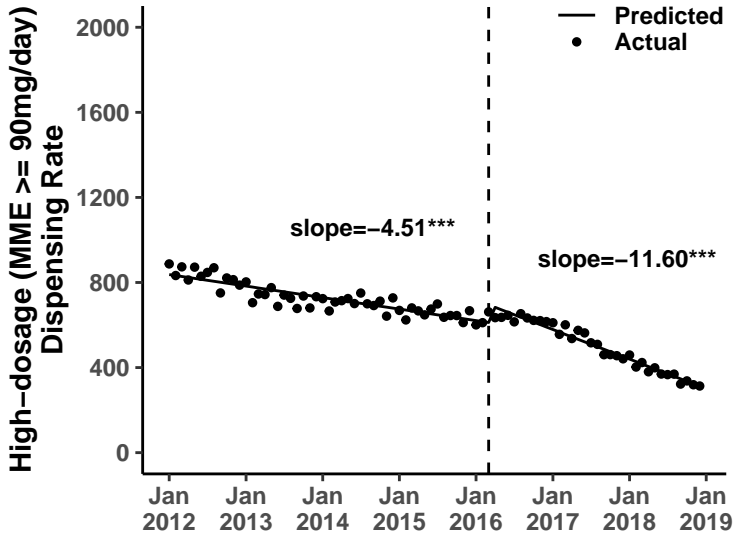

### Maine

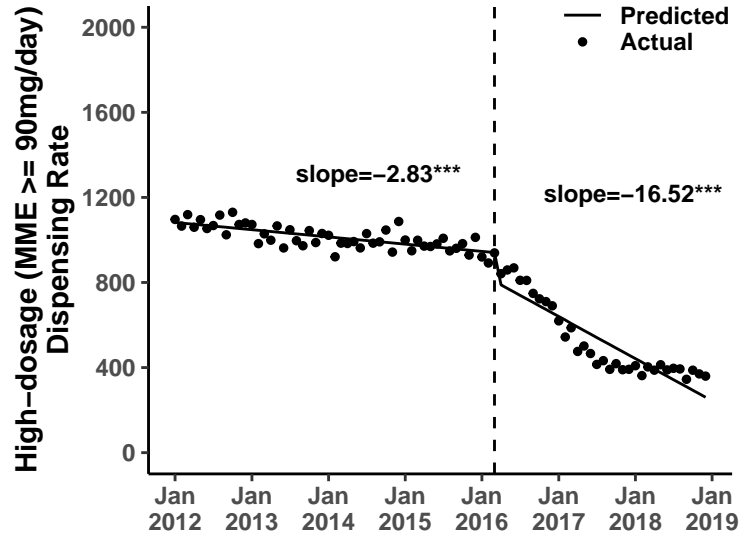

### Michigan

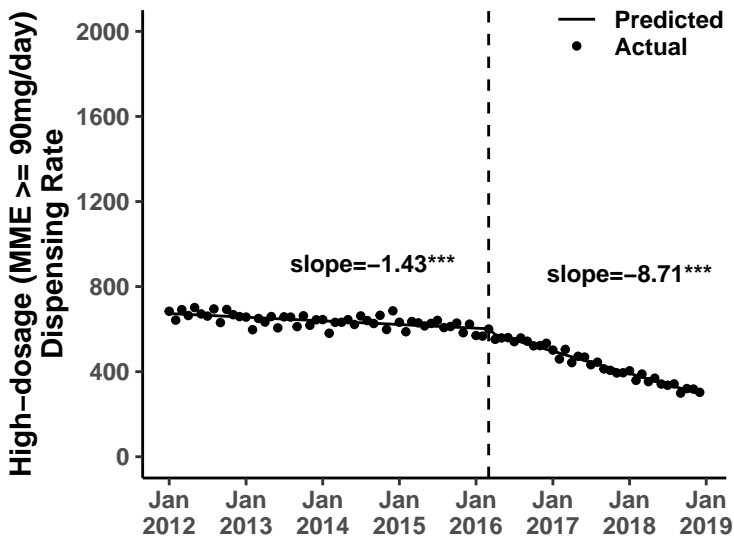

### Minnesota

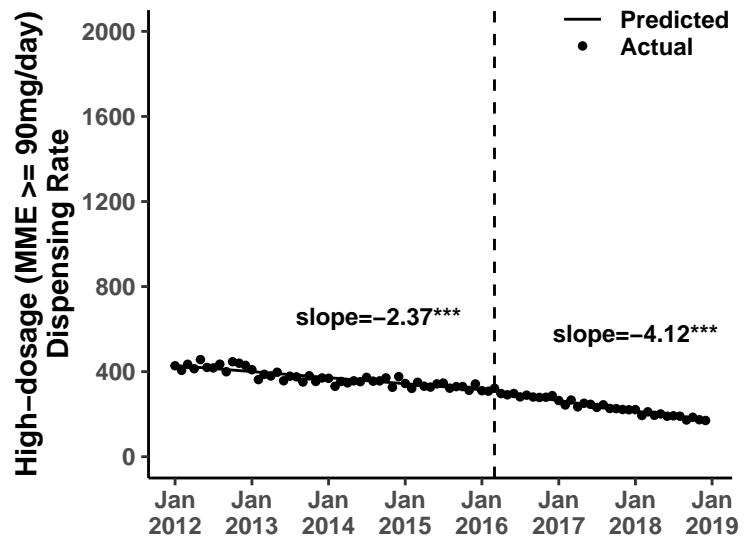

### Missouri

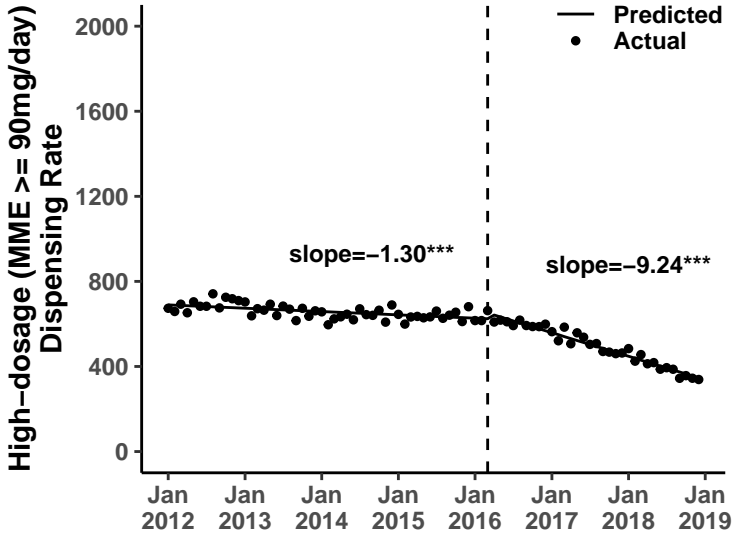

### Mississippi

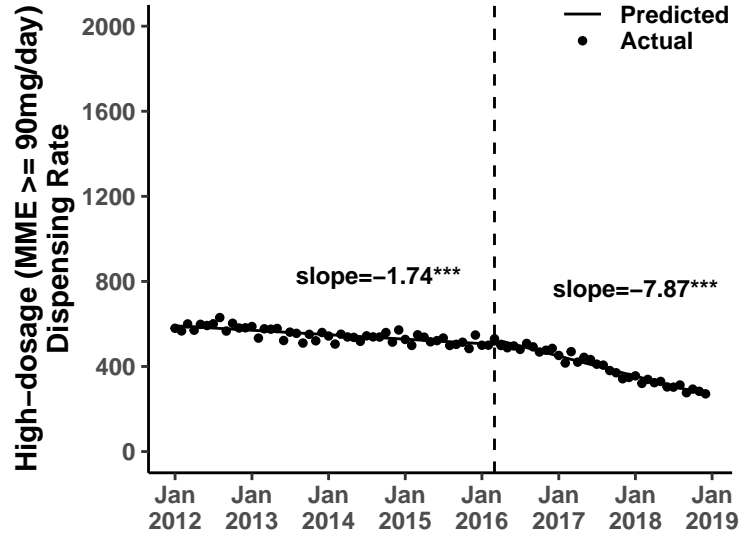

### Montana

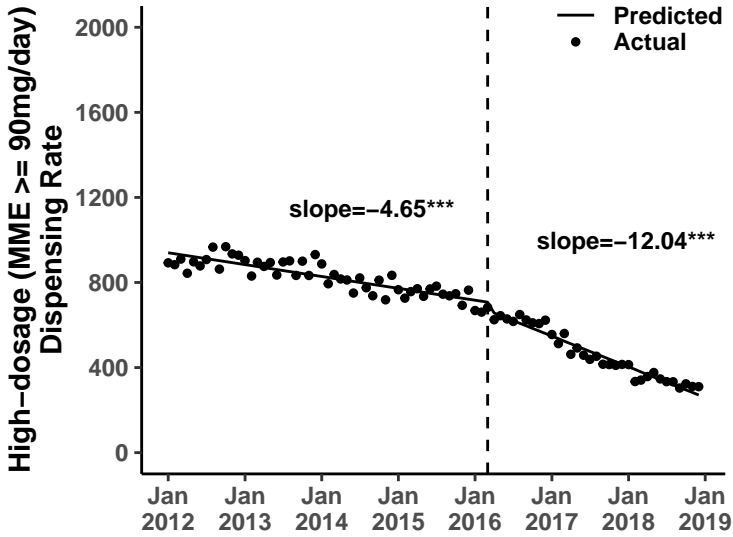

### North Carolina

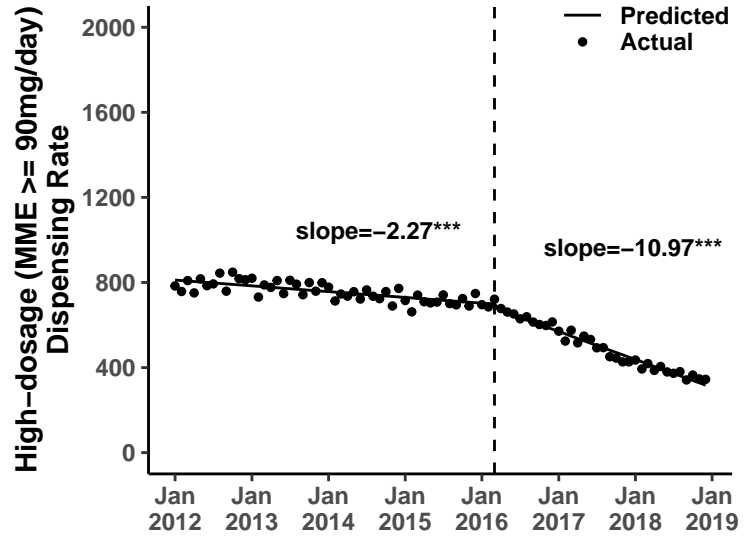

### North Dakota

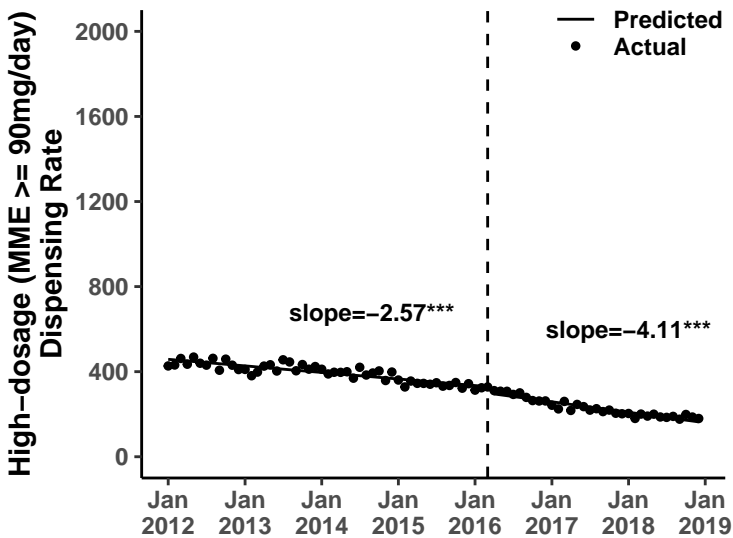

### Nebraska

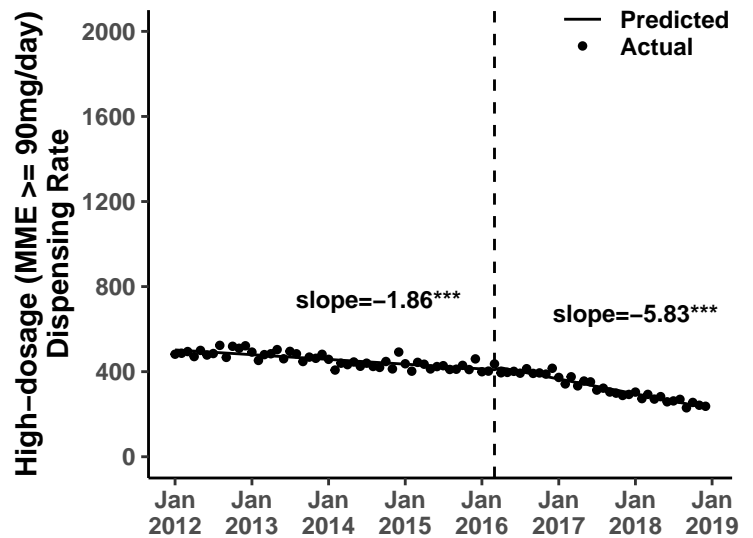

### New Hampshire

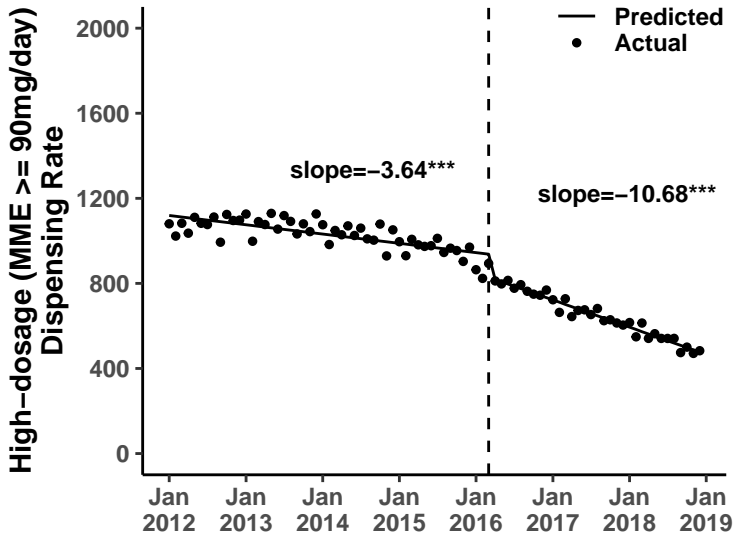

### New Jersey

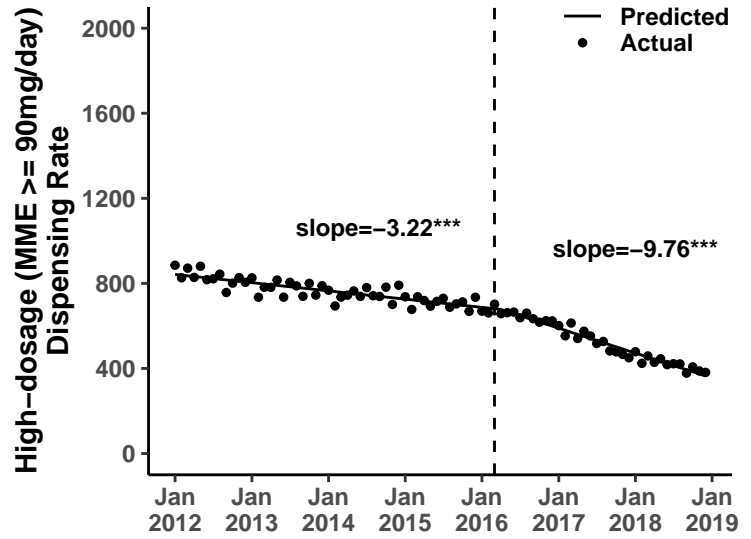

### New Mexico

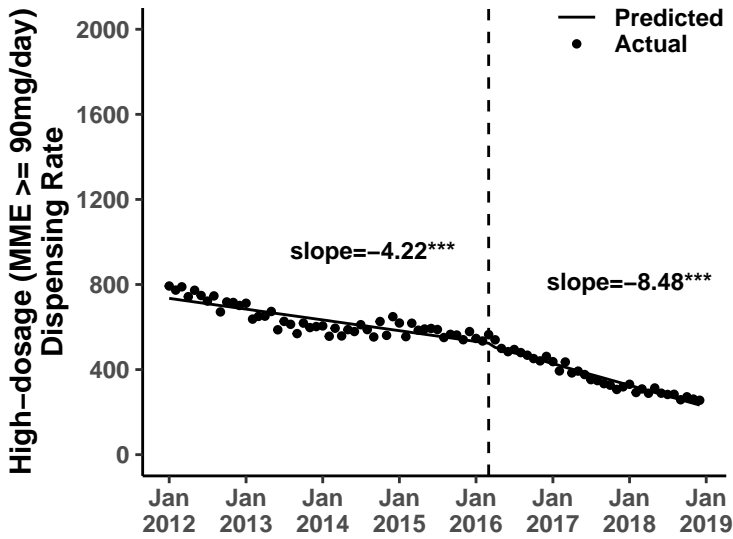

### Nevada

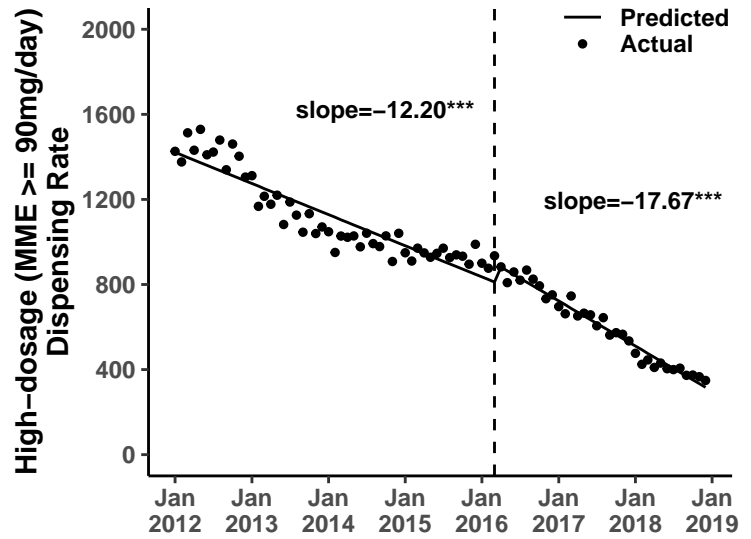

### New York

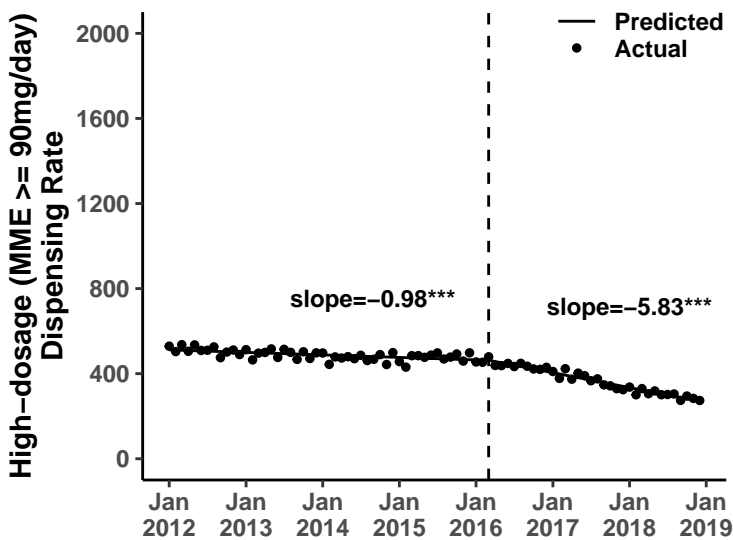

### Ohio

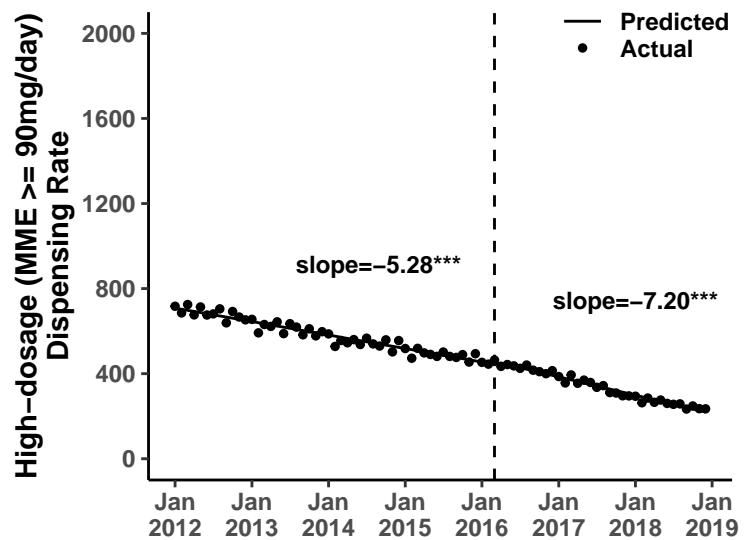

### Oklahoma

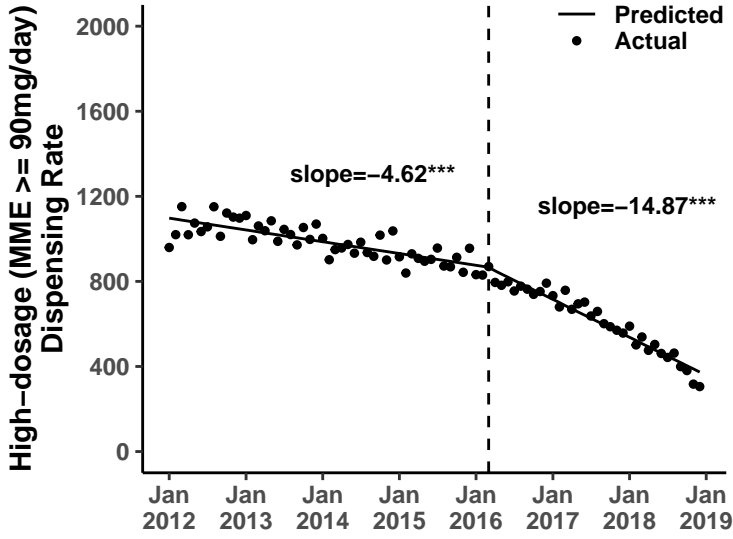

### Oregon

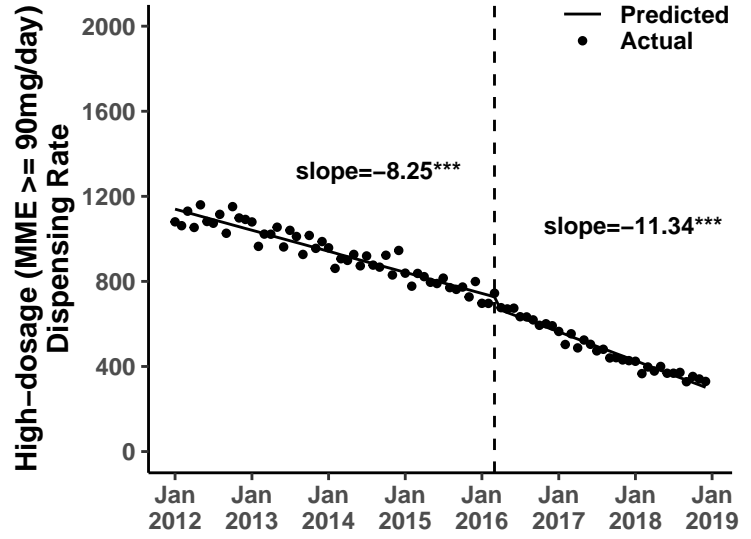

### Pennsylvania

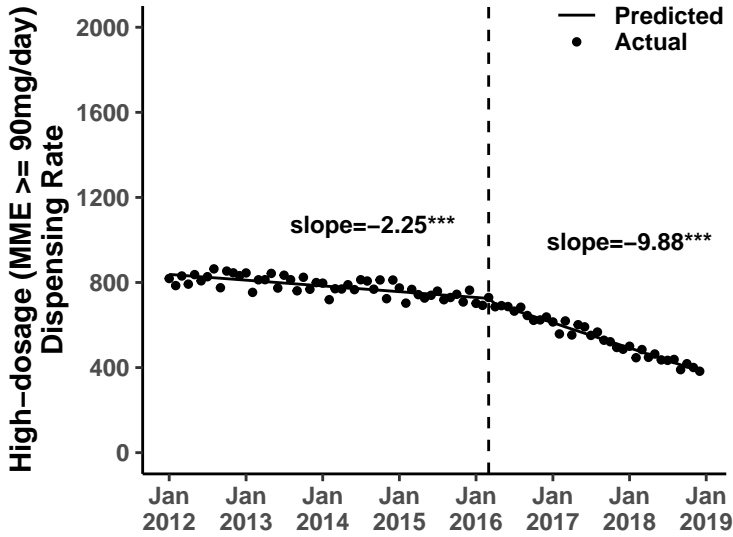

### Rhode Island

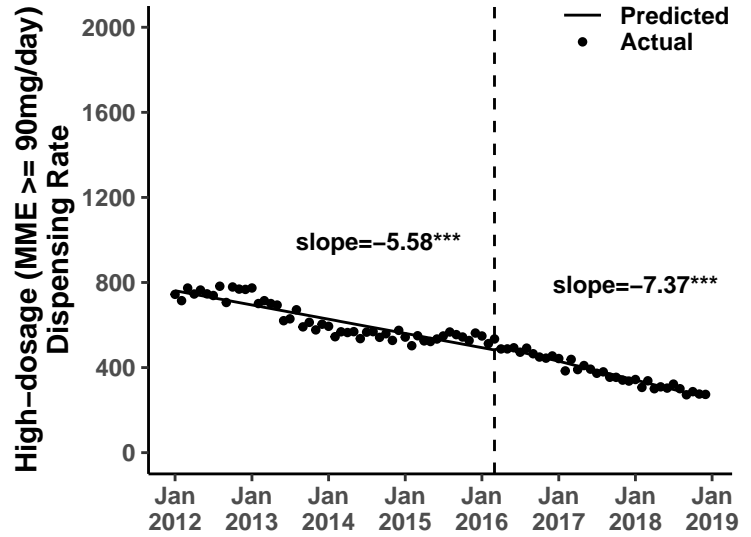

### South Carolina

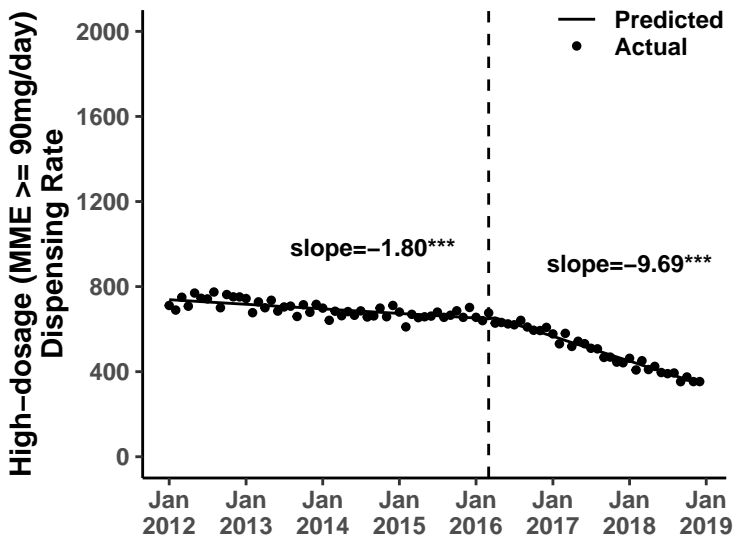

### South Dakota

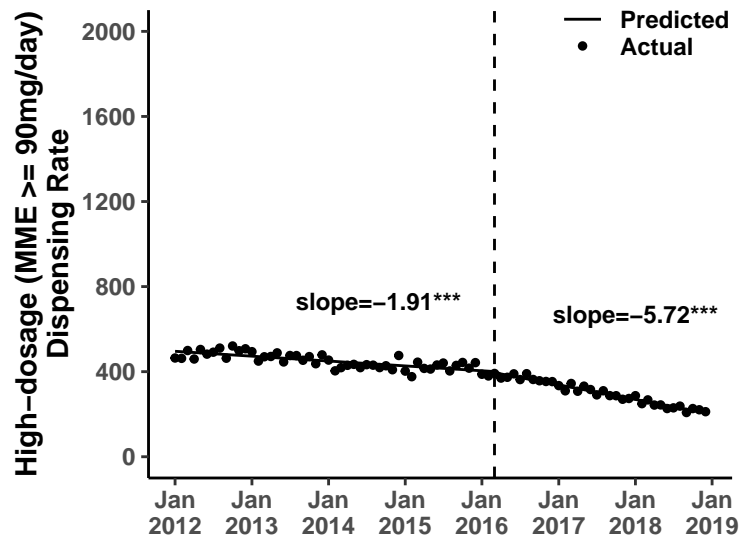

### Tennessee

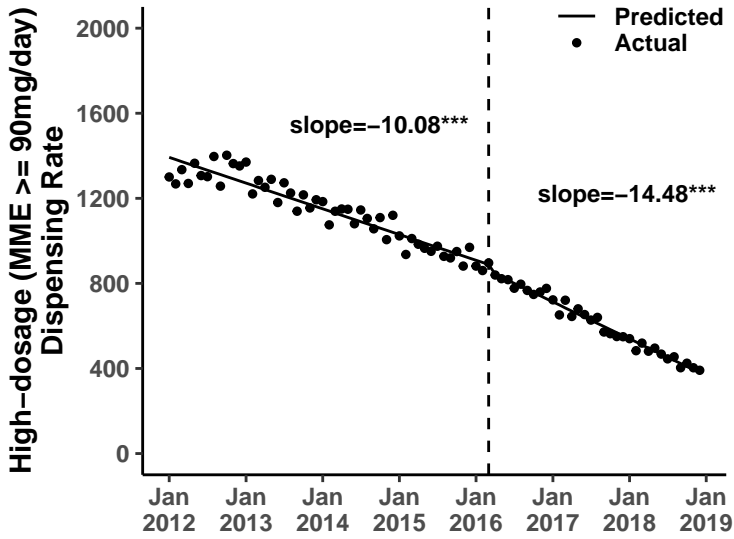

### Texas

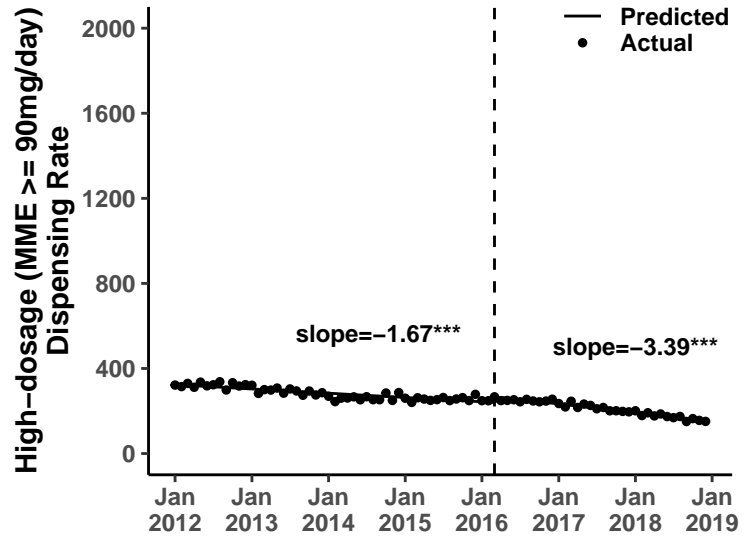

### Utah

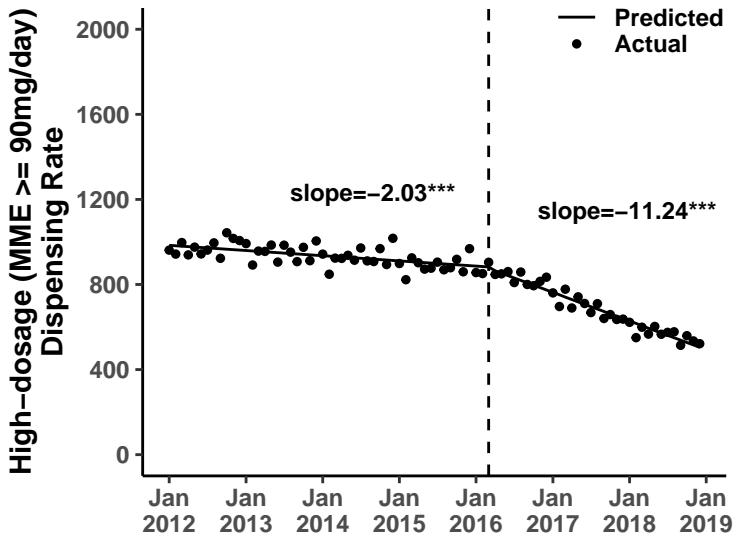

### Virginia

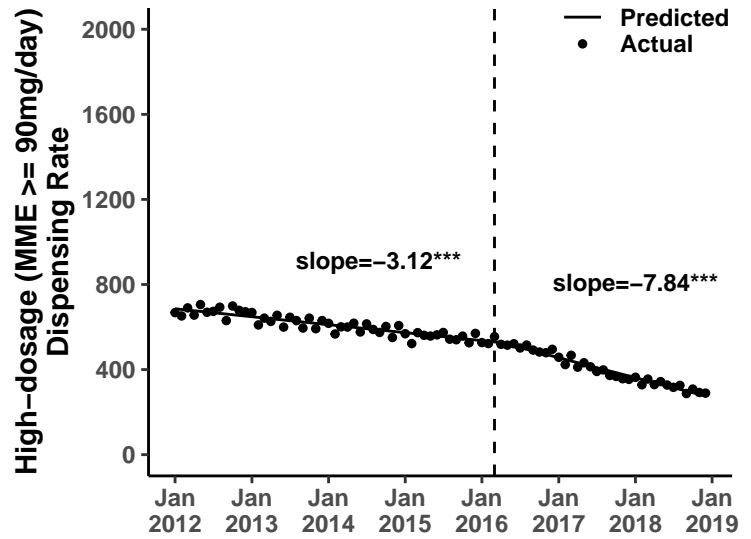

### Vermont

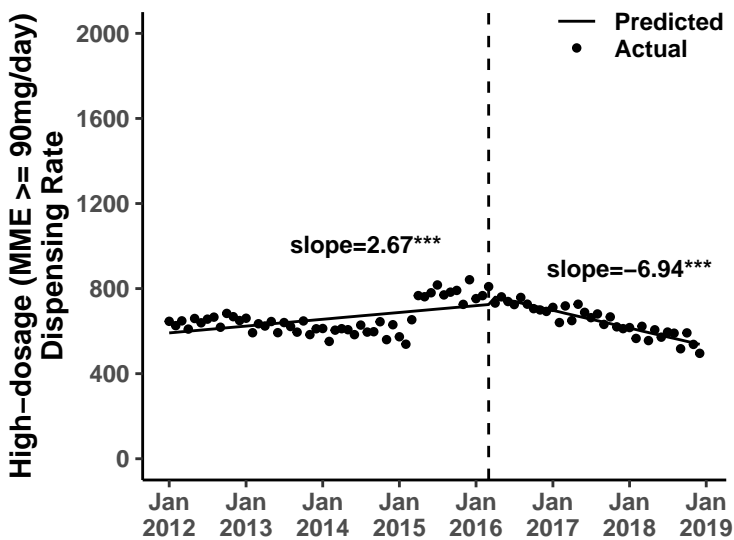

### Washington

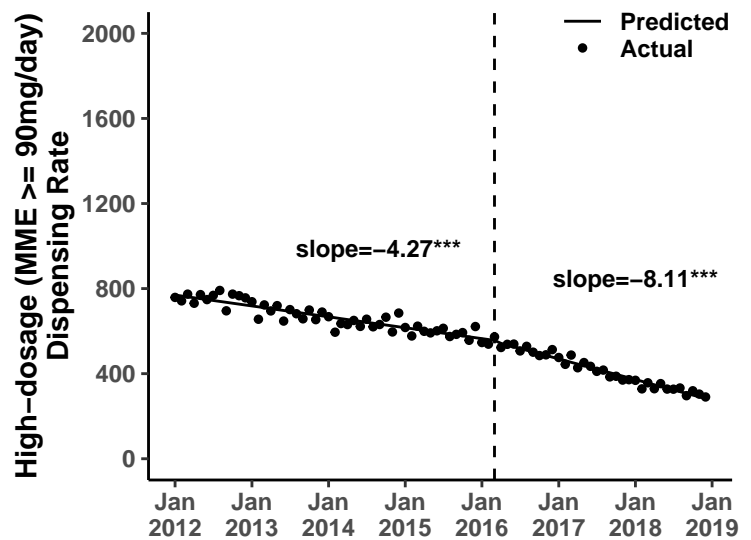

### Wisconsin

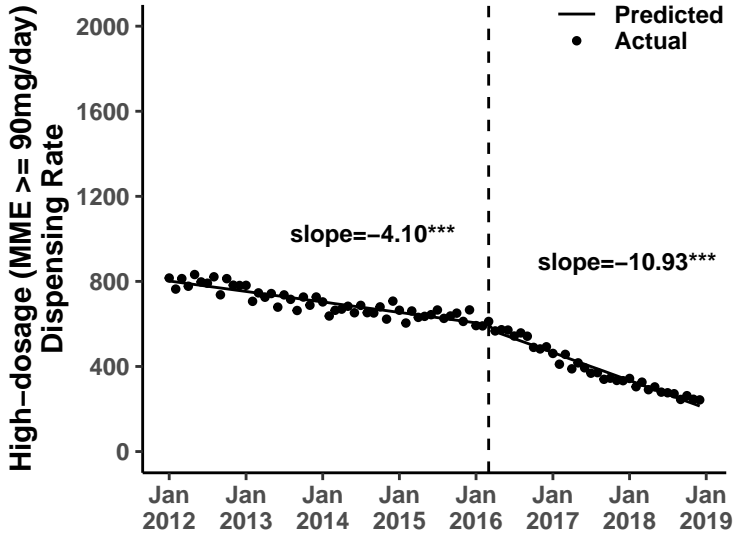

### West Virginia

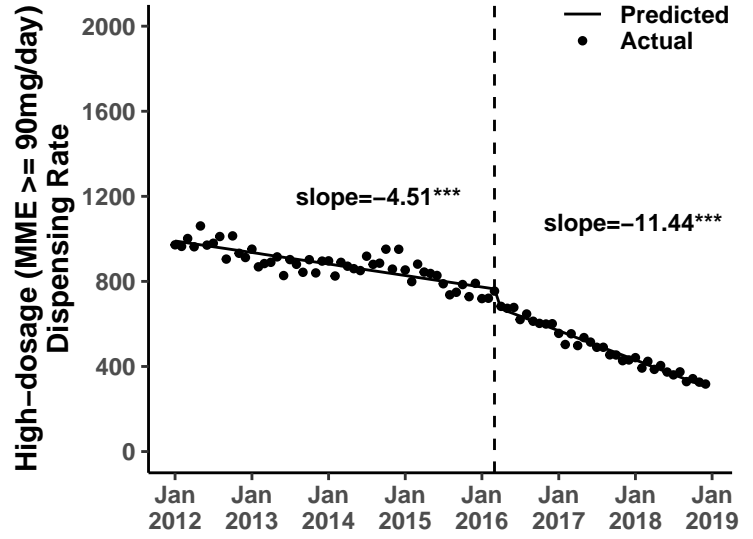

### Wyoming

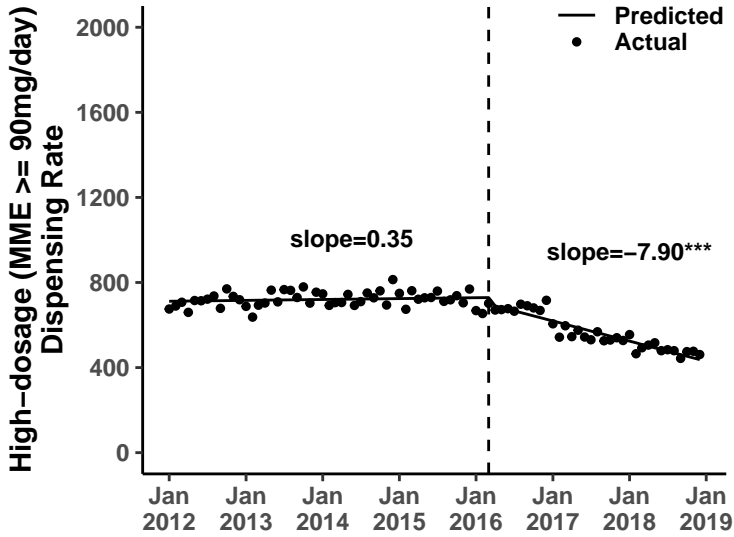

**eFigure 4. Trends in the in per-capita MME dispensing from 2012 through 2018, with linear regression lines showing the pre- and post-Guideline slopes superimposed**

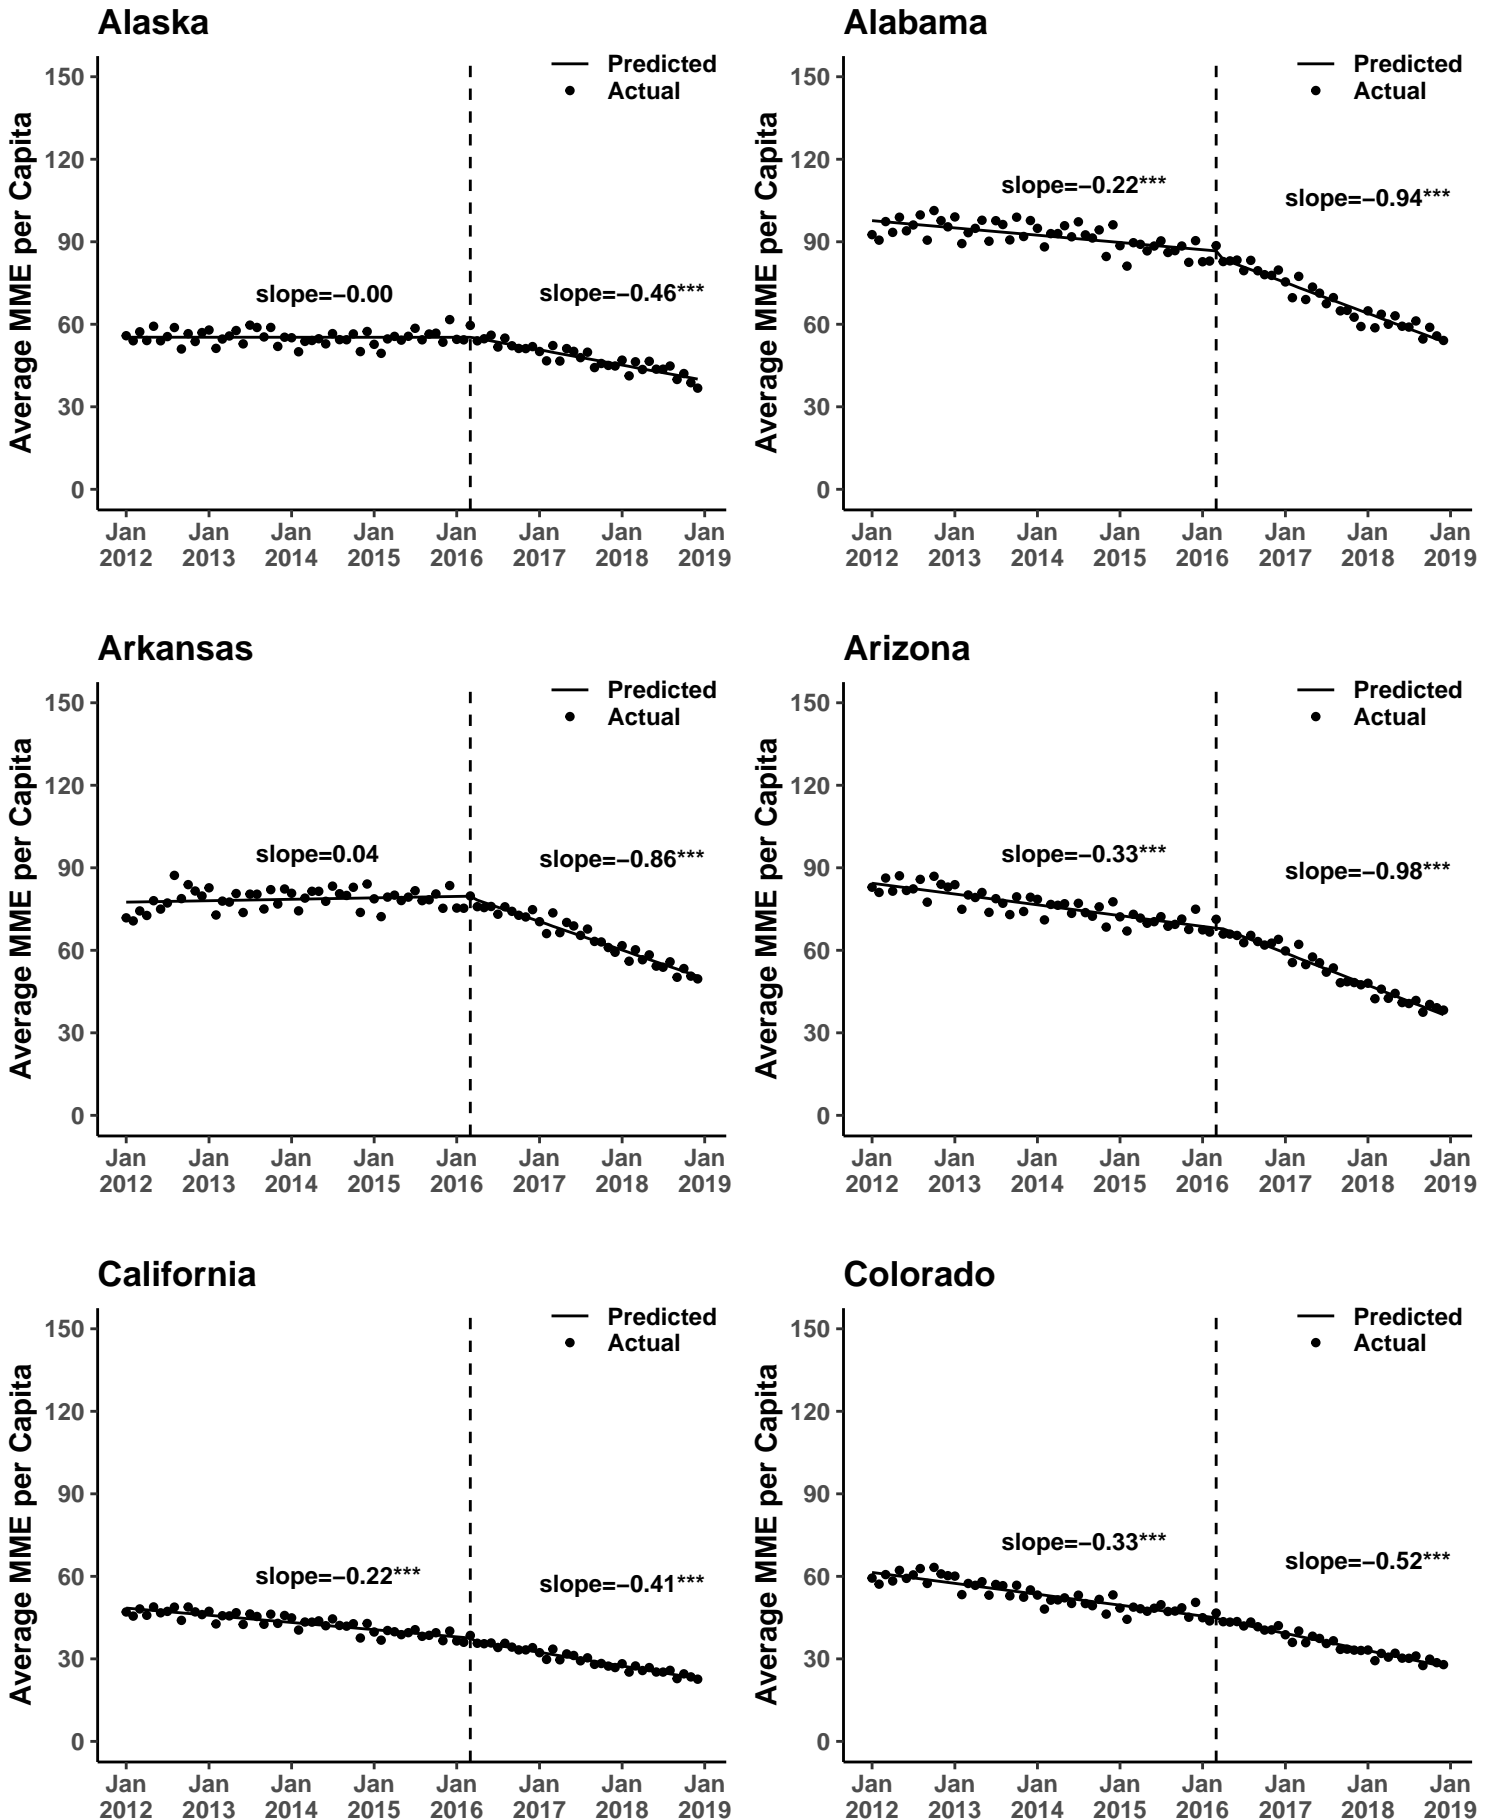

### Connecticut

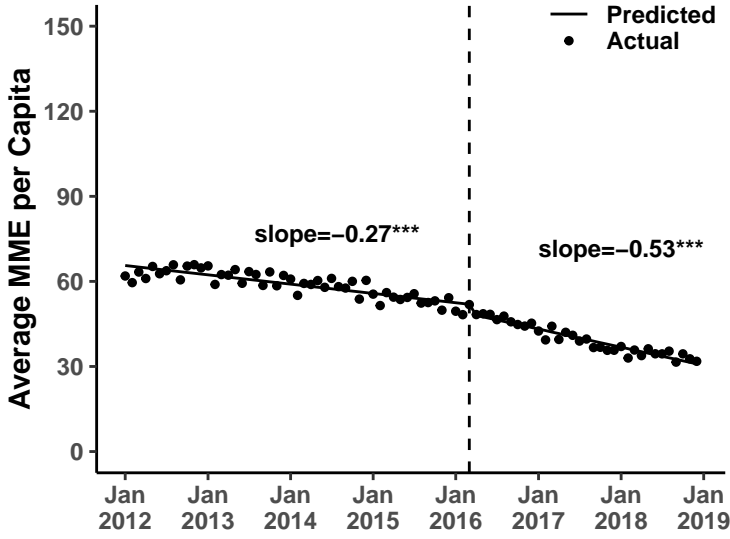

### District of Columbia

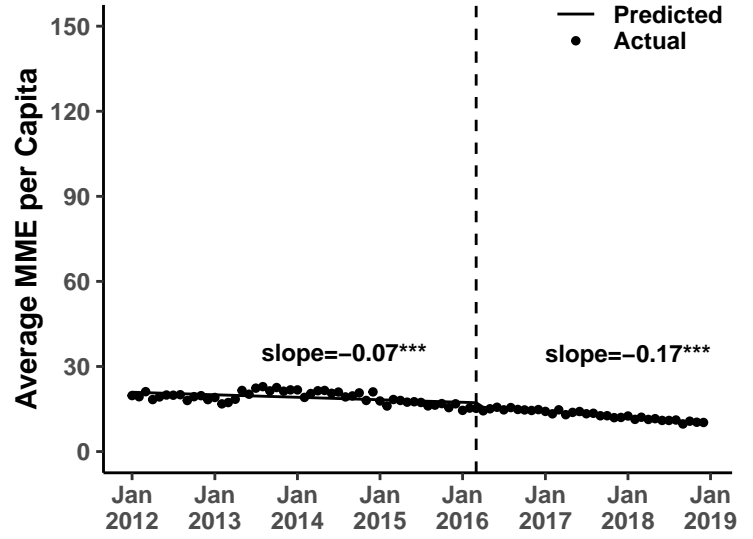

### Delaware

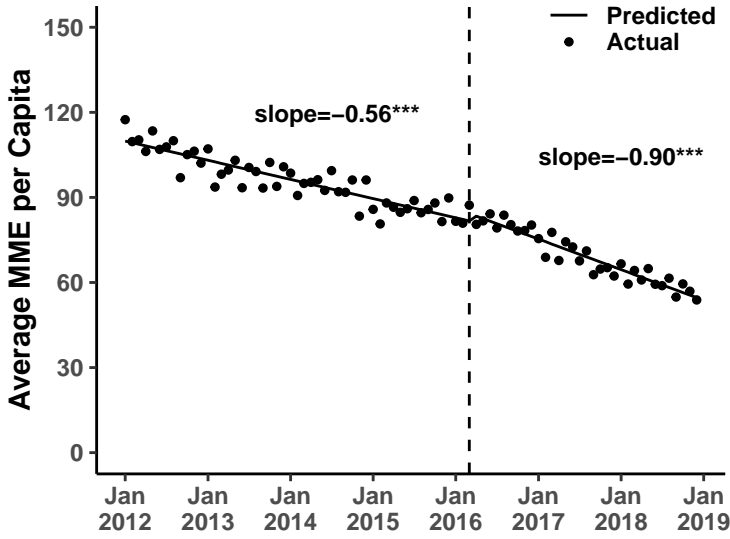

### Florida

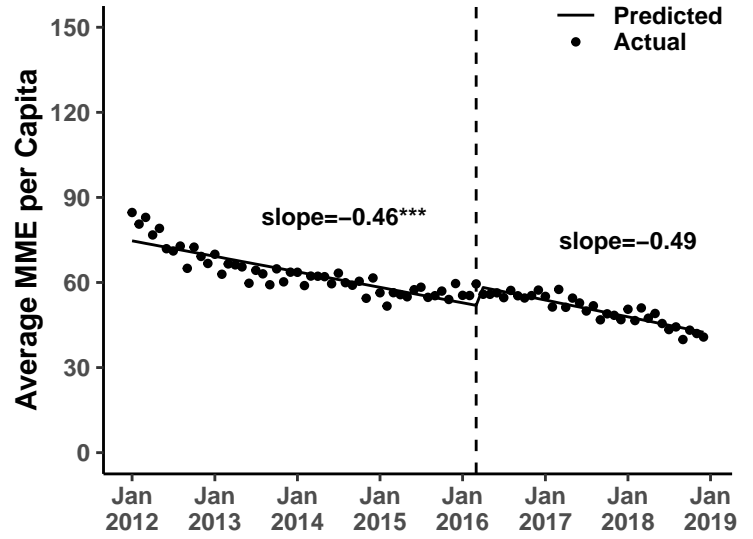

### Georgia

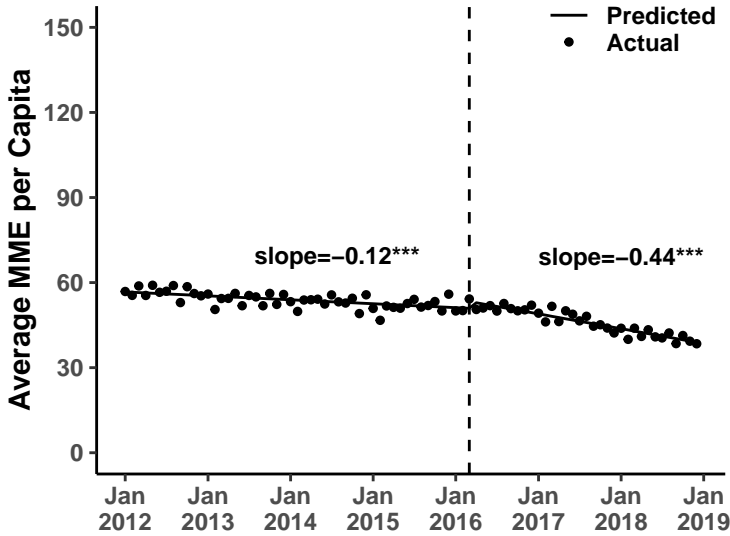

### Hawaii

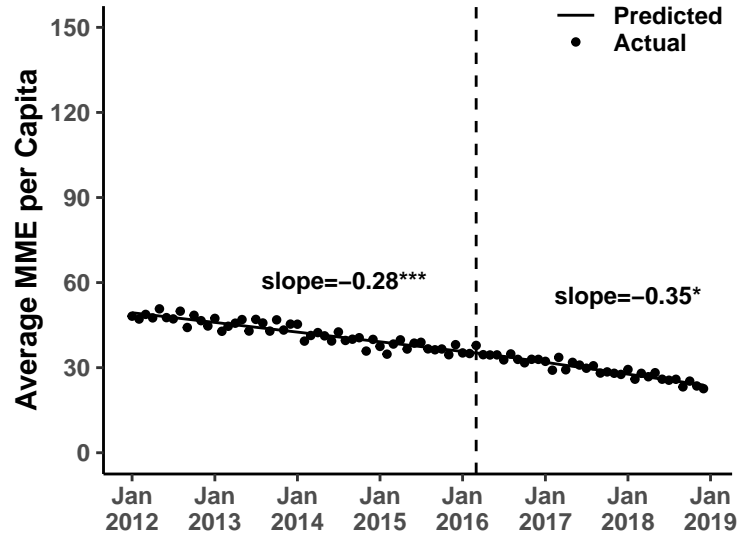



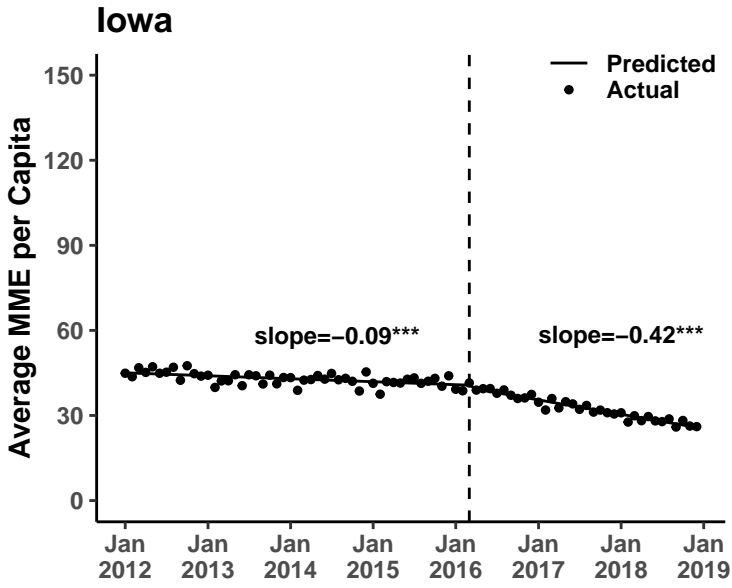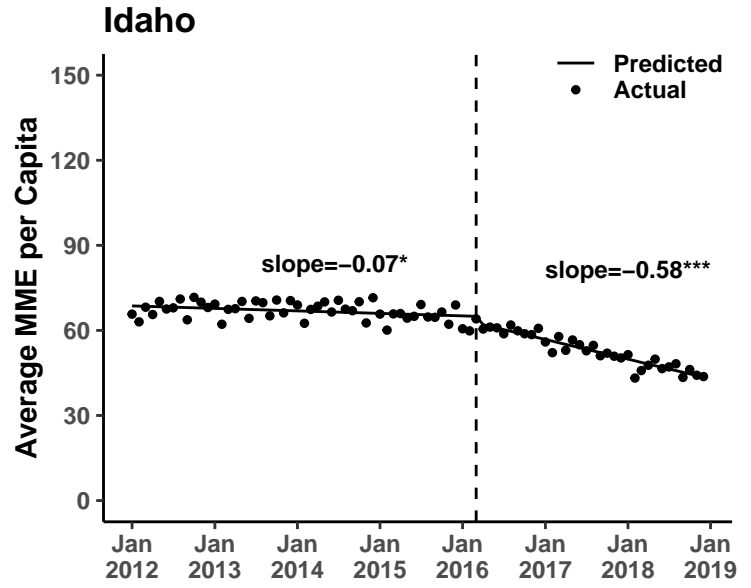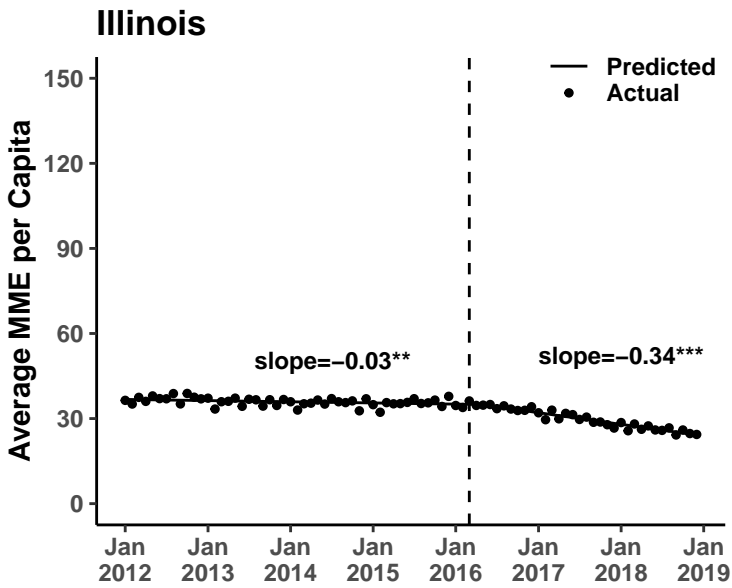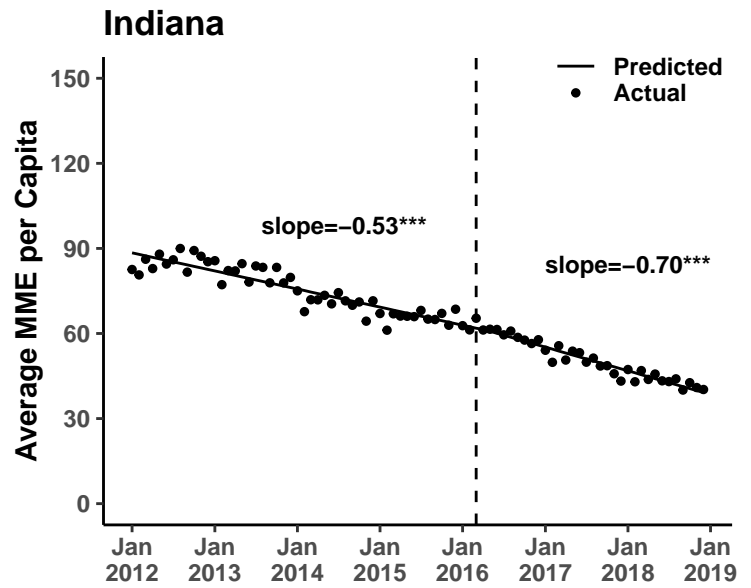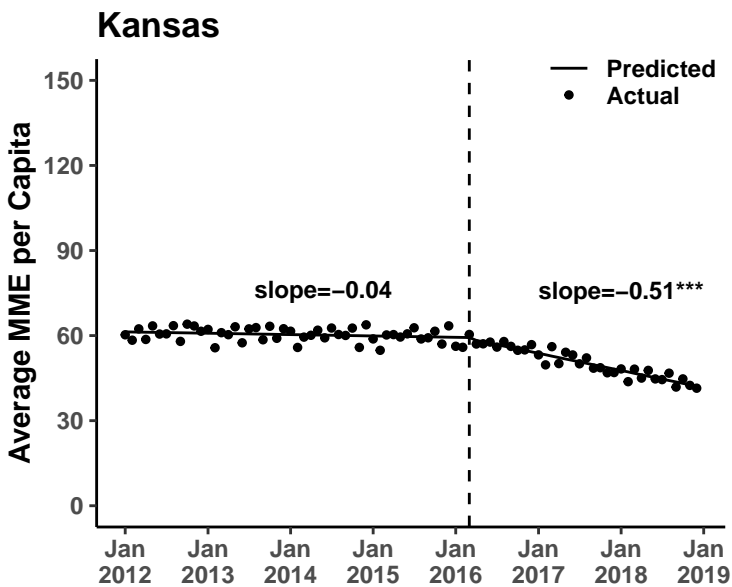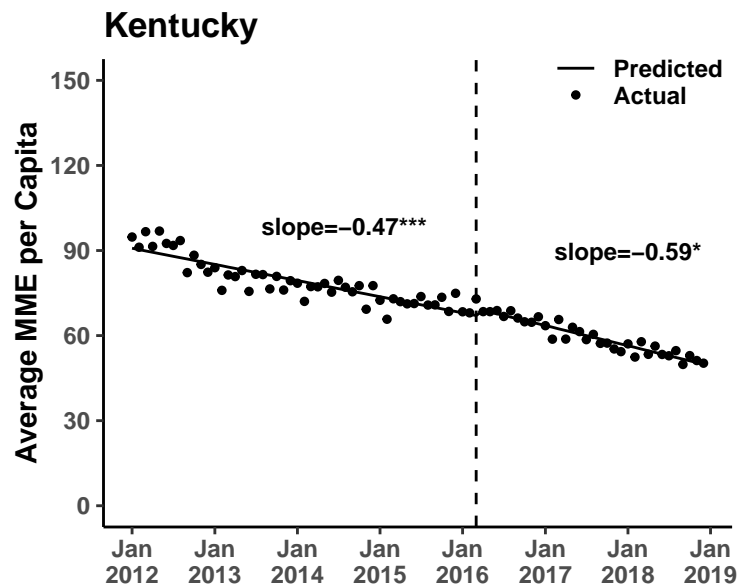

### Louisiana

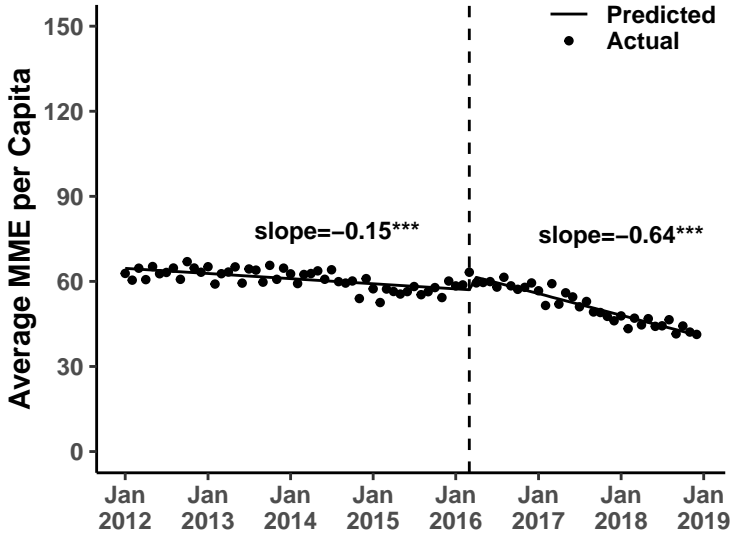

### Massachusetts

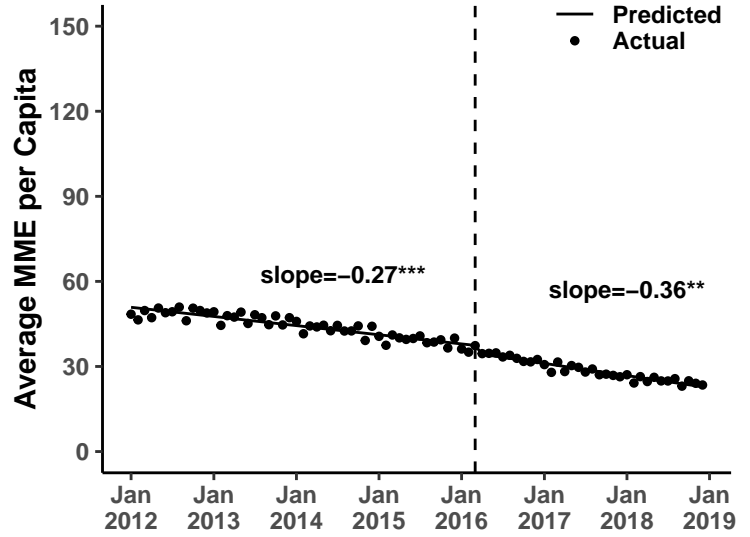

### Maryland

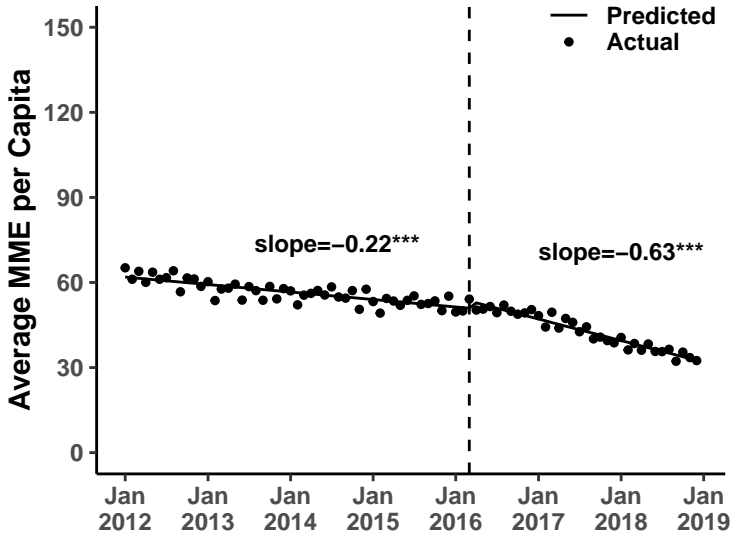

### Maine

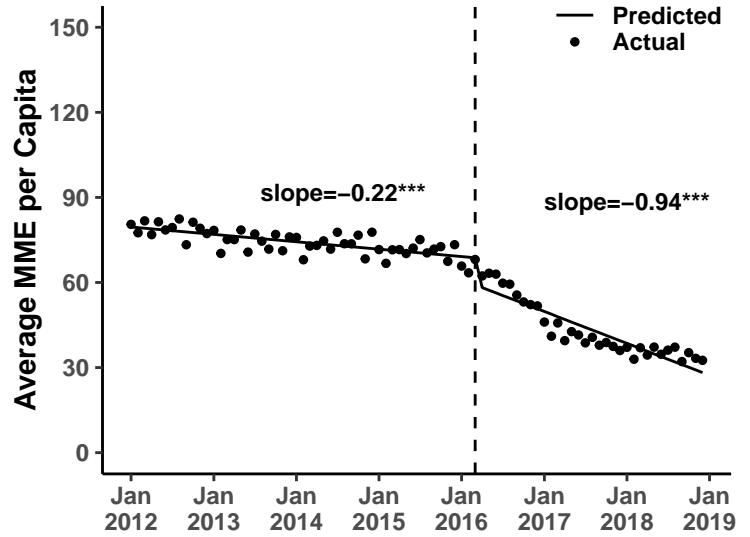

### Michigan

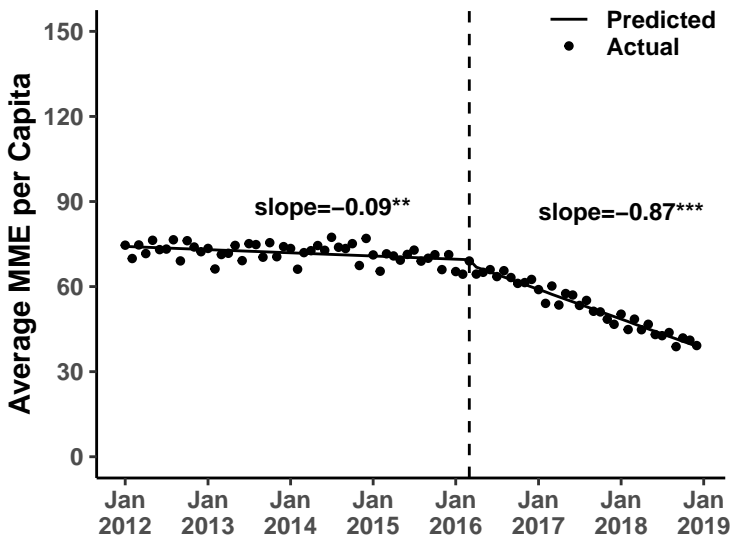

### Minnesota

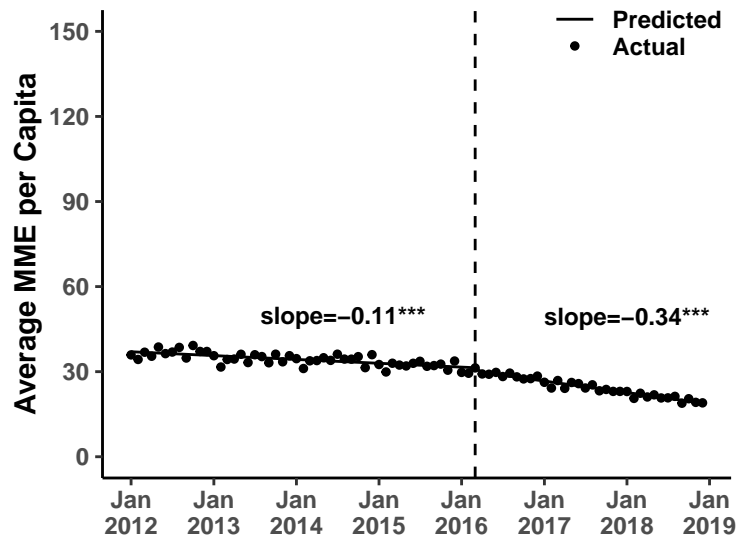

### Missouri

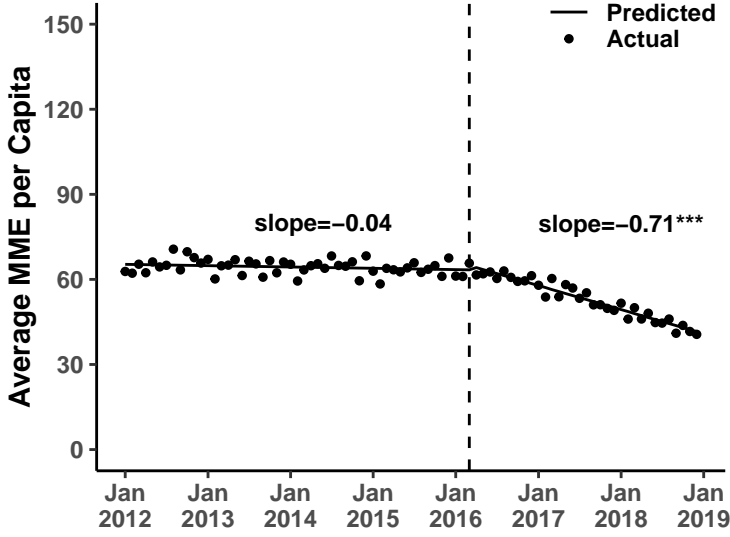

### Mississippi

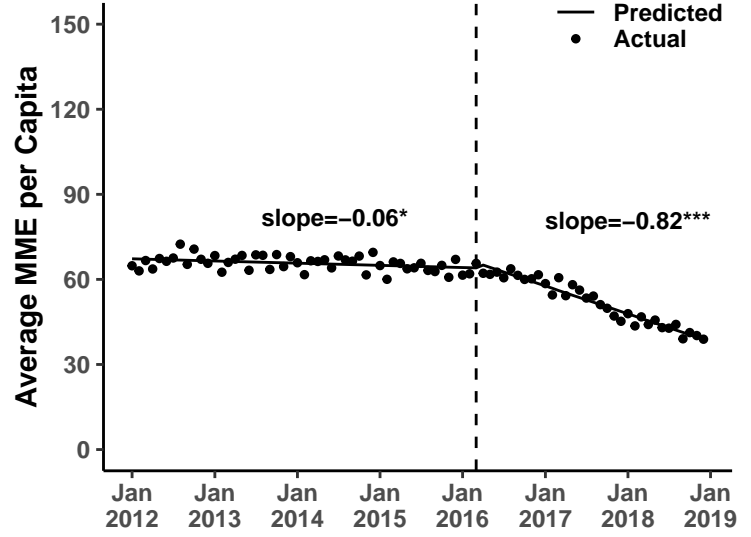

### Montana

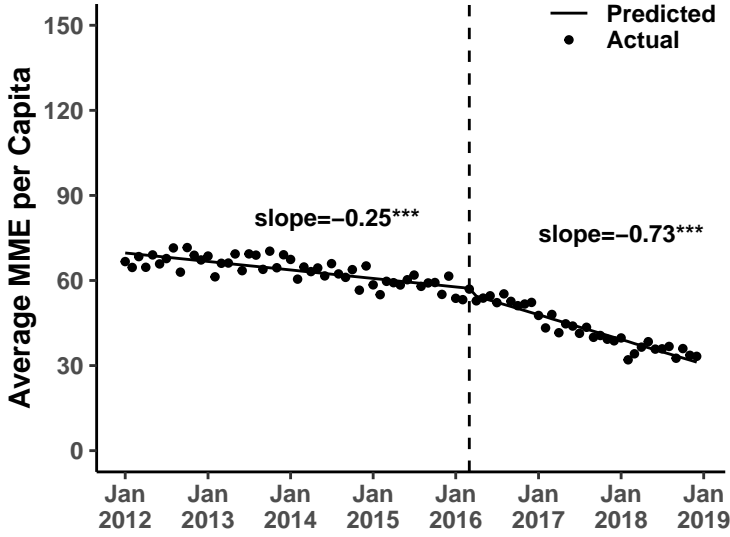

### North Carolina

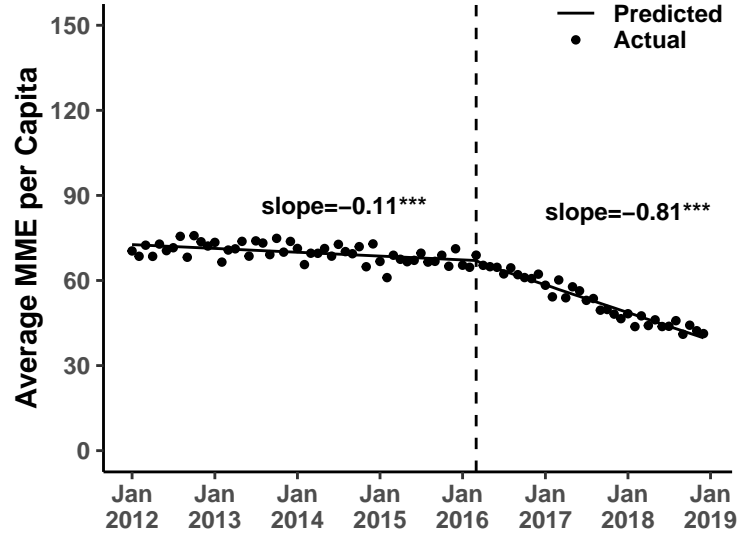

### North Dakota

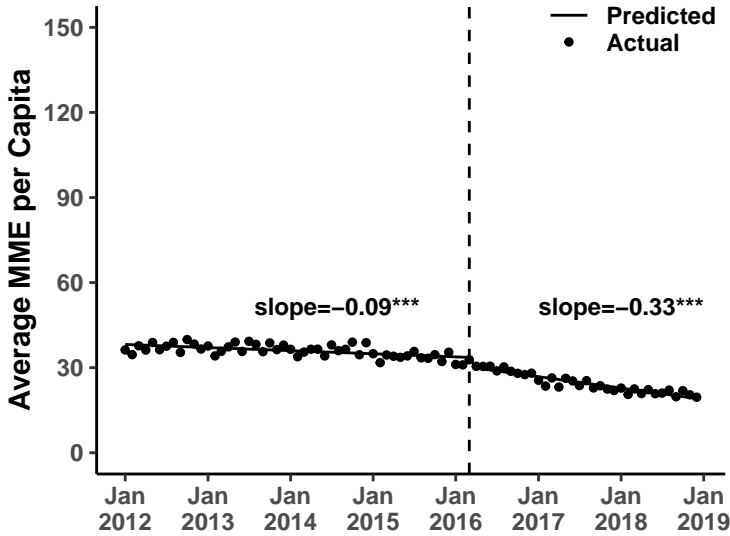

### Nebraska

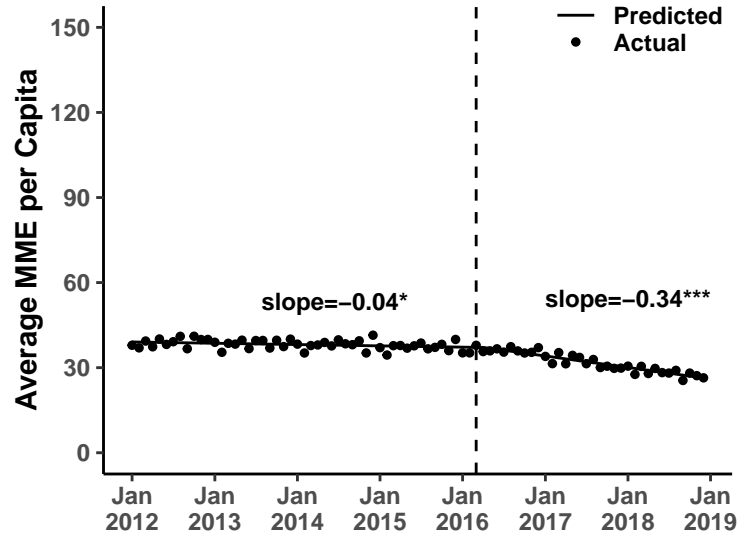

### New Hampshire

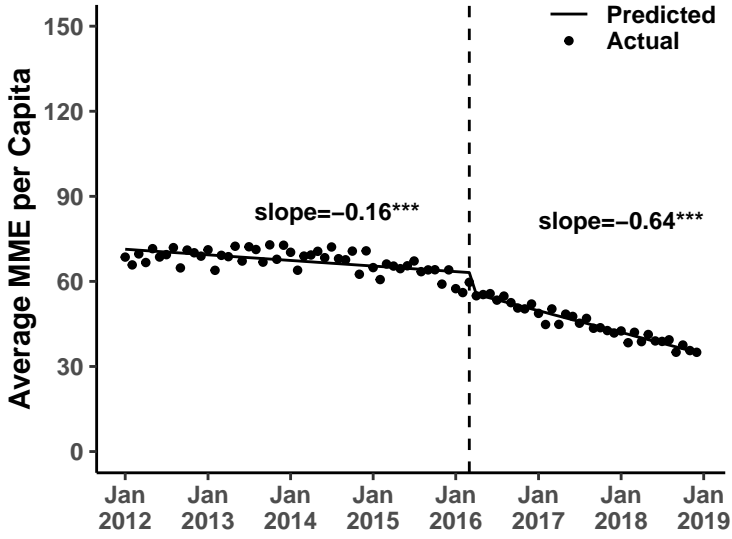

### New Jersey

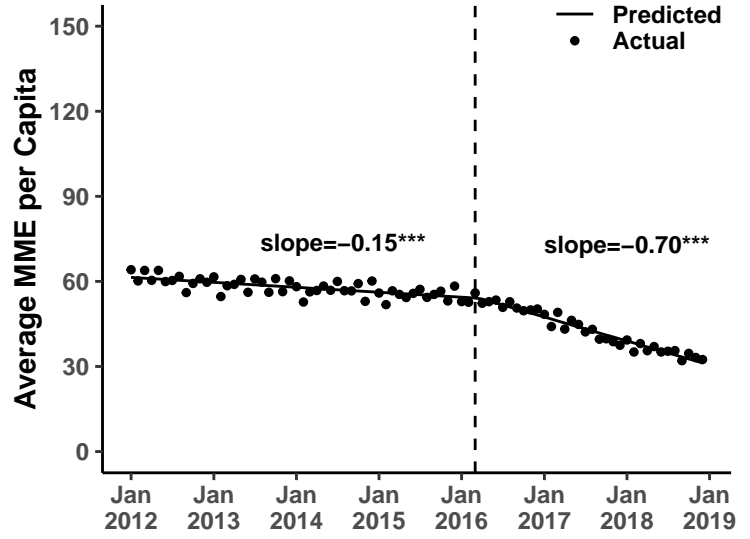

### New Mexico

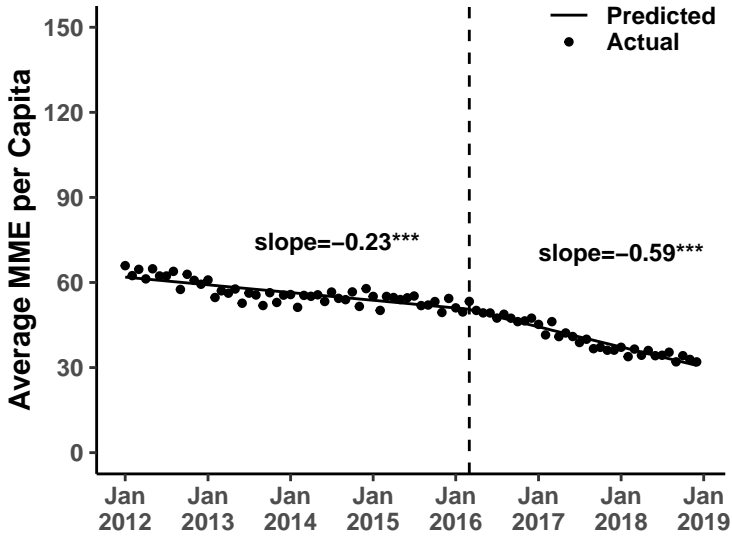

### Nevada

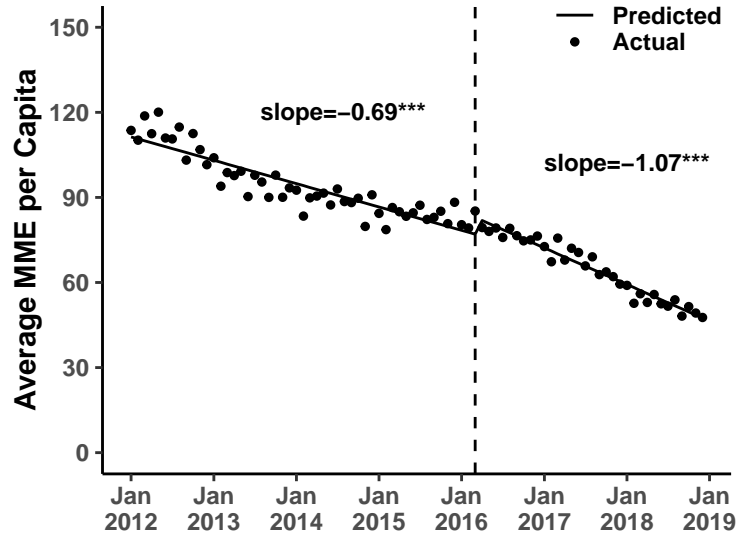

### New York

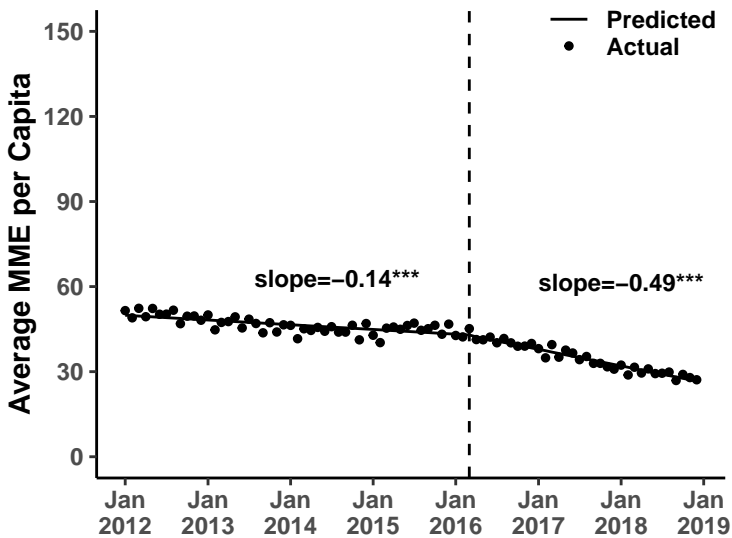

### Ohio

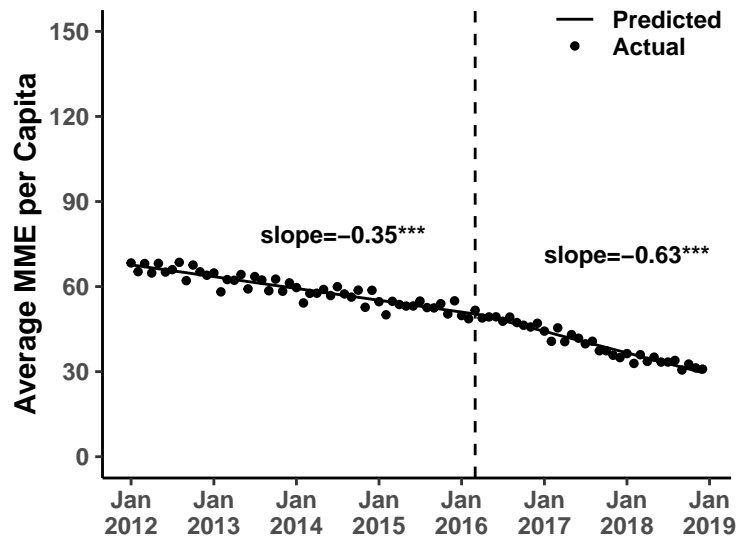

### Oklahoma

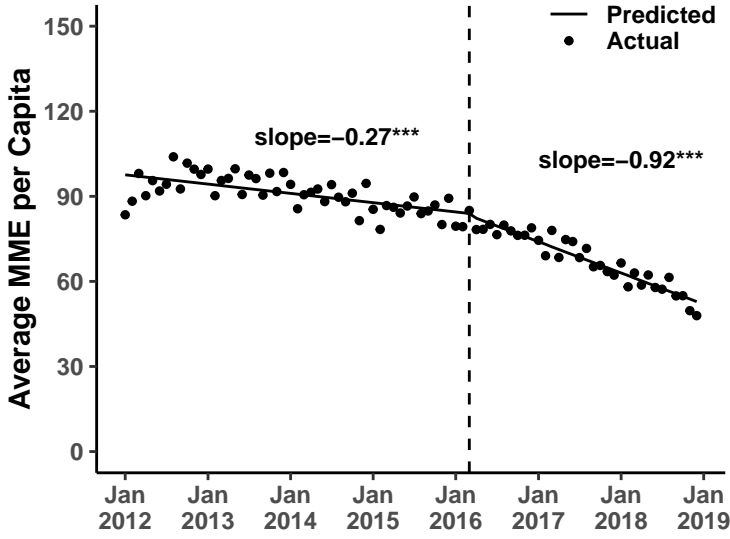

### Oregon

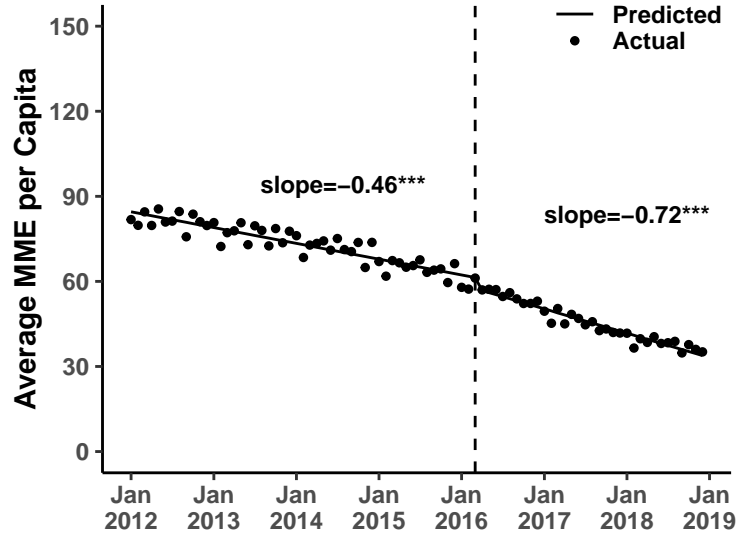

### Pennsylvania

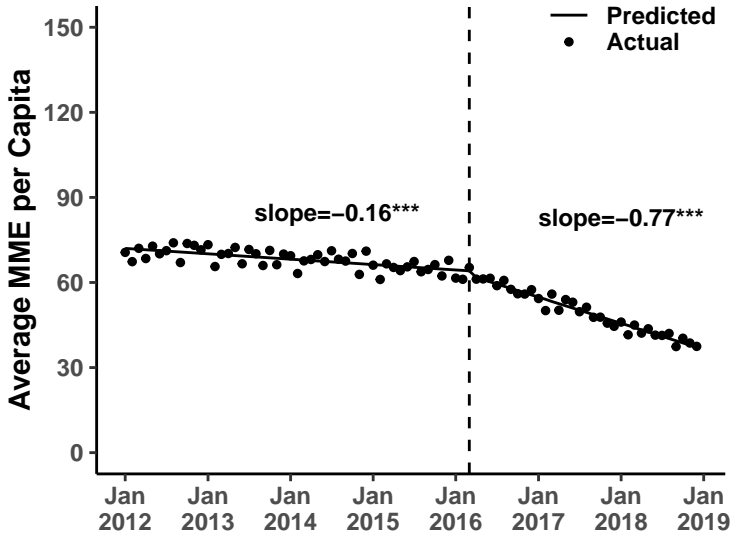

### Rhode Island

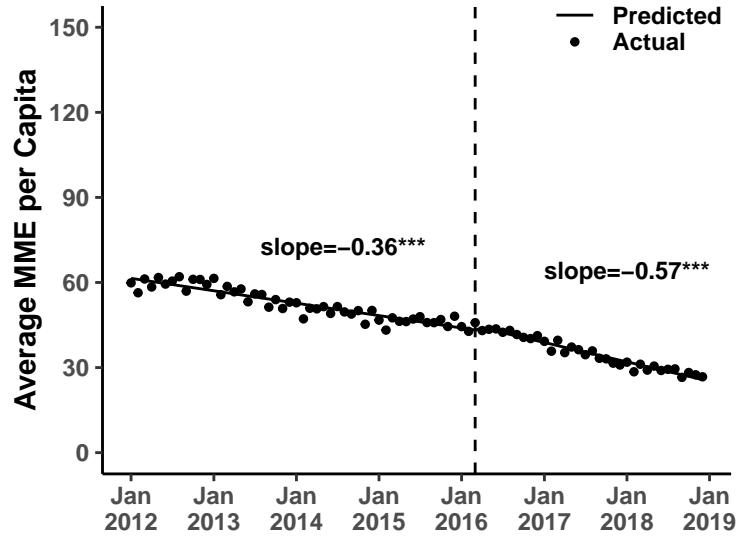

### South Carolina

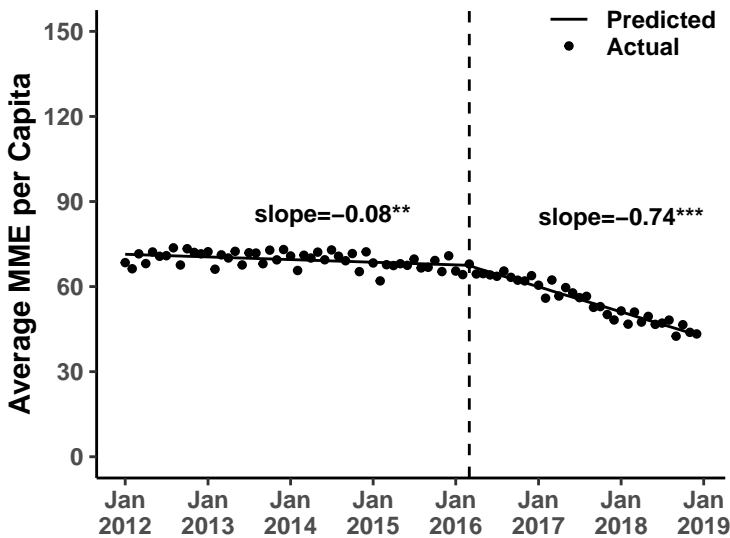

### South Dakota

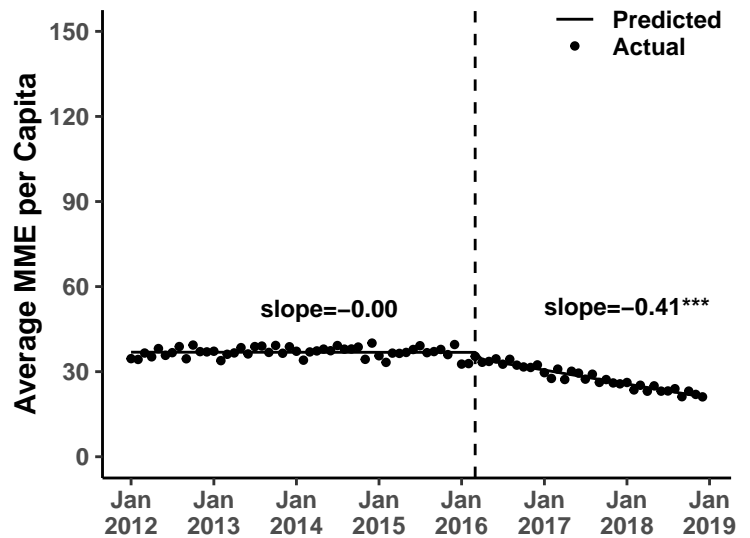

### Tennessee

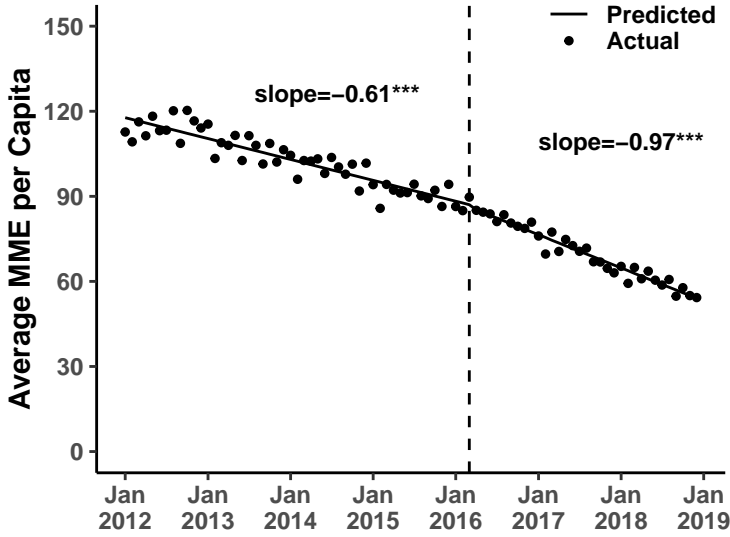

### Texas

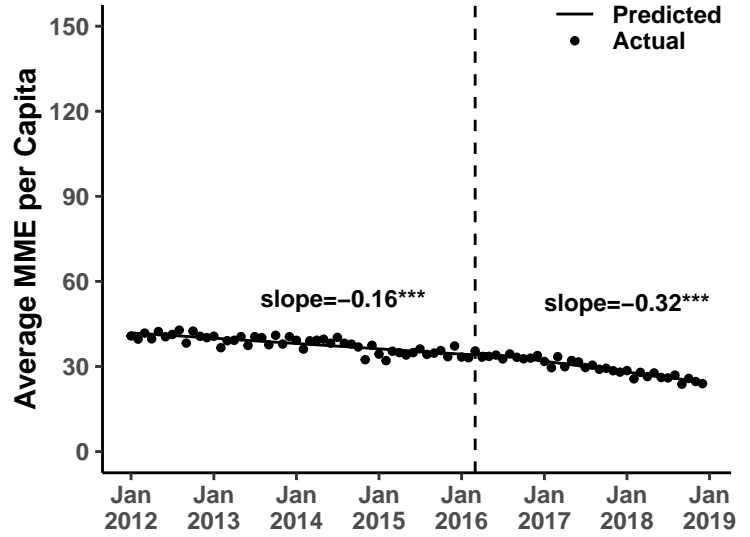

### Utah

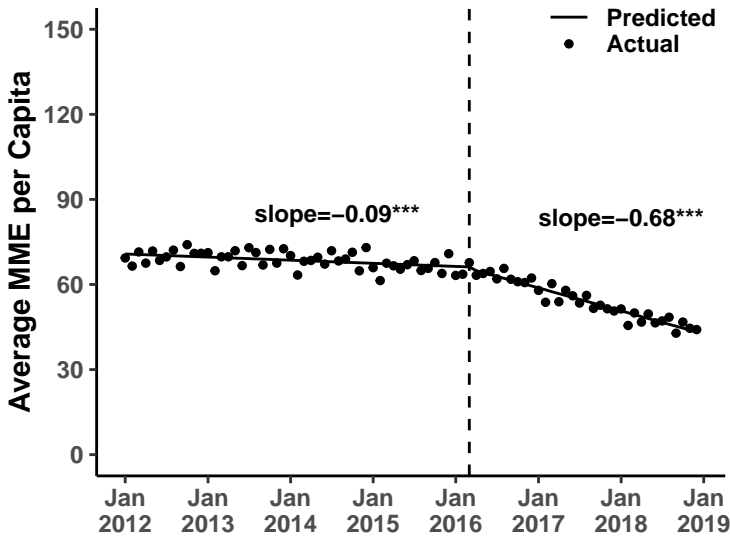

### Virginia

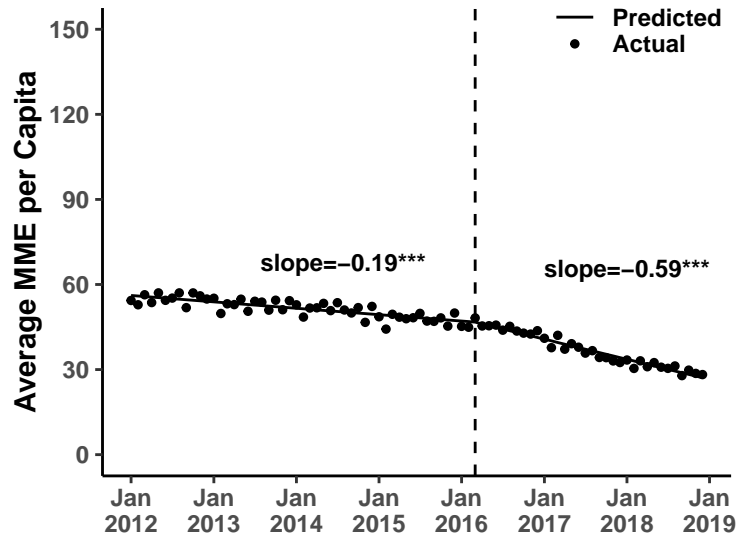

### Vermont

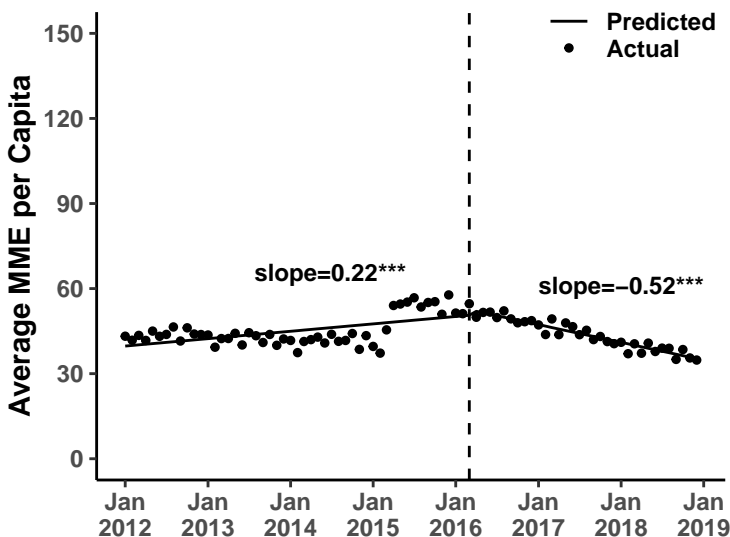

### Washington

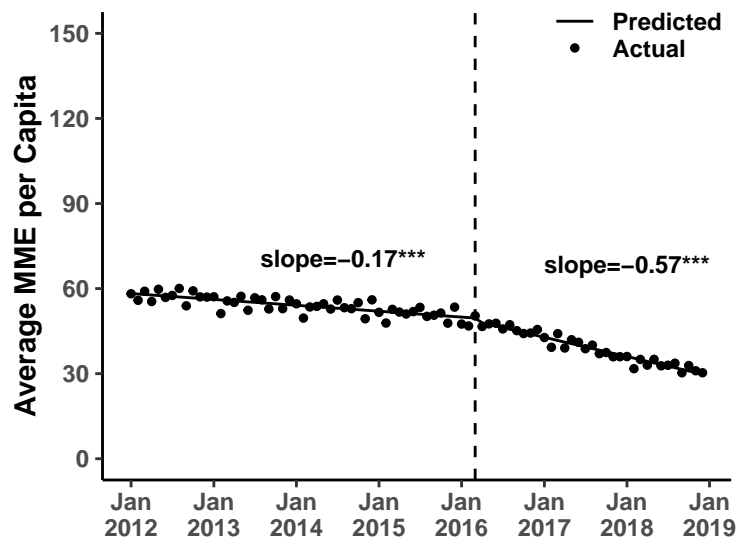

### Wisconsin

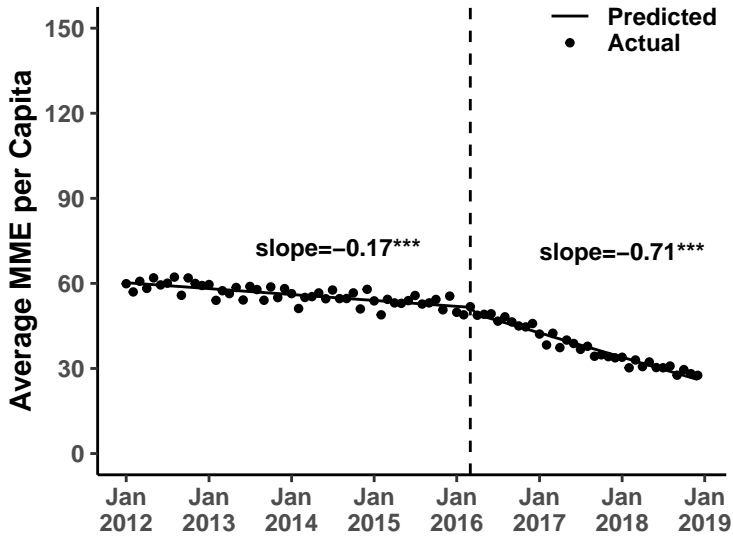

### West Virginia

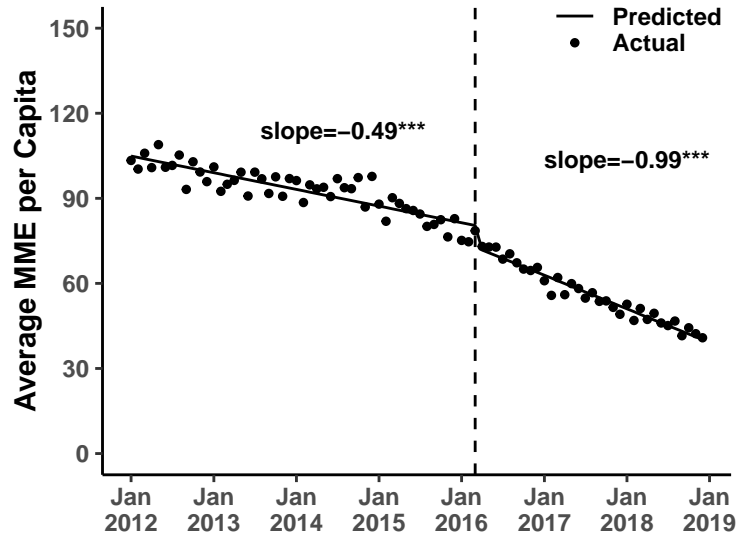

### Wyoming

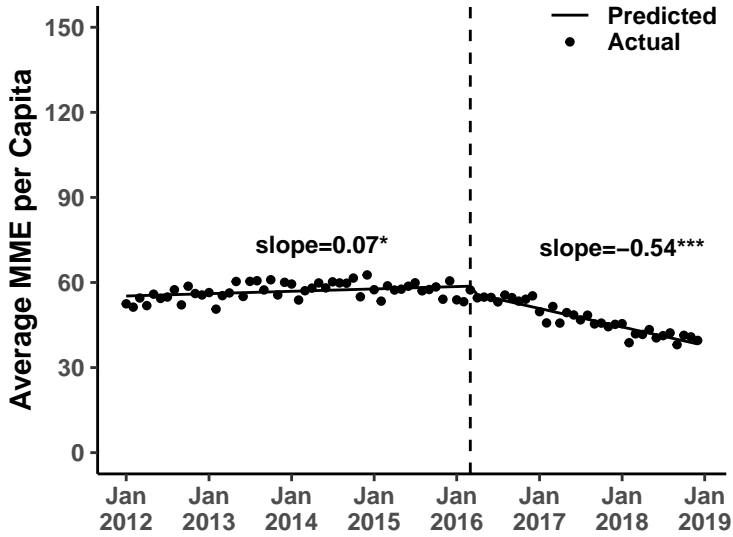

**eFigure 5. Association between baseline dispensing levels and the slope change (pre- vs. post-Guideline) at the state-level for each of the four primary outcomes**

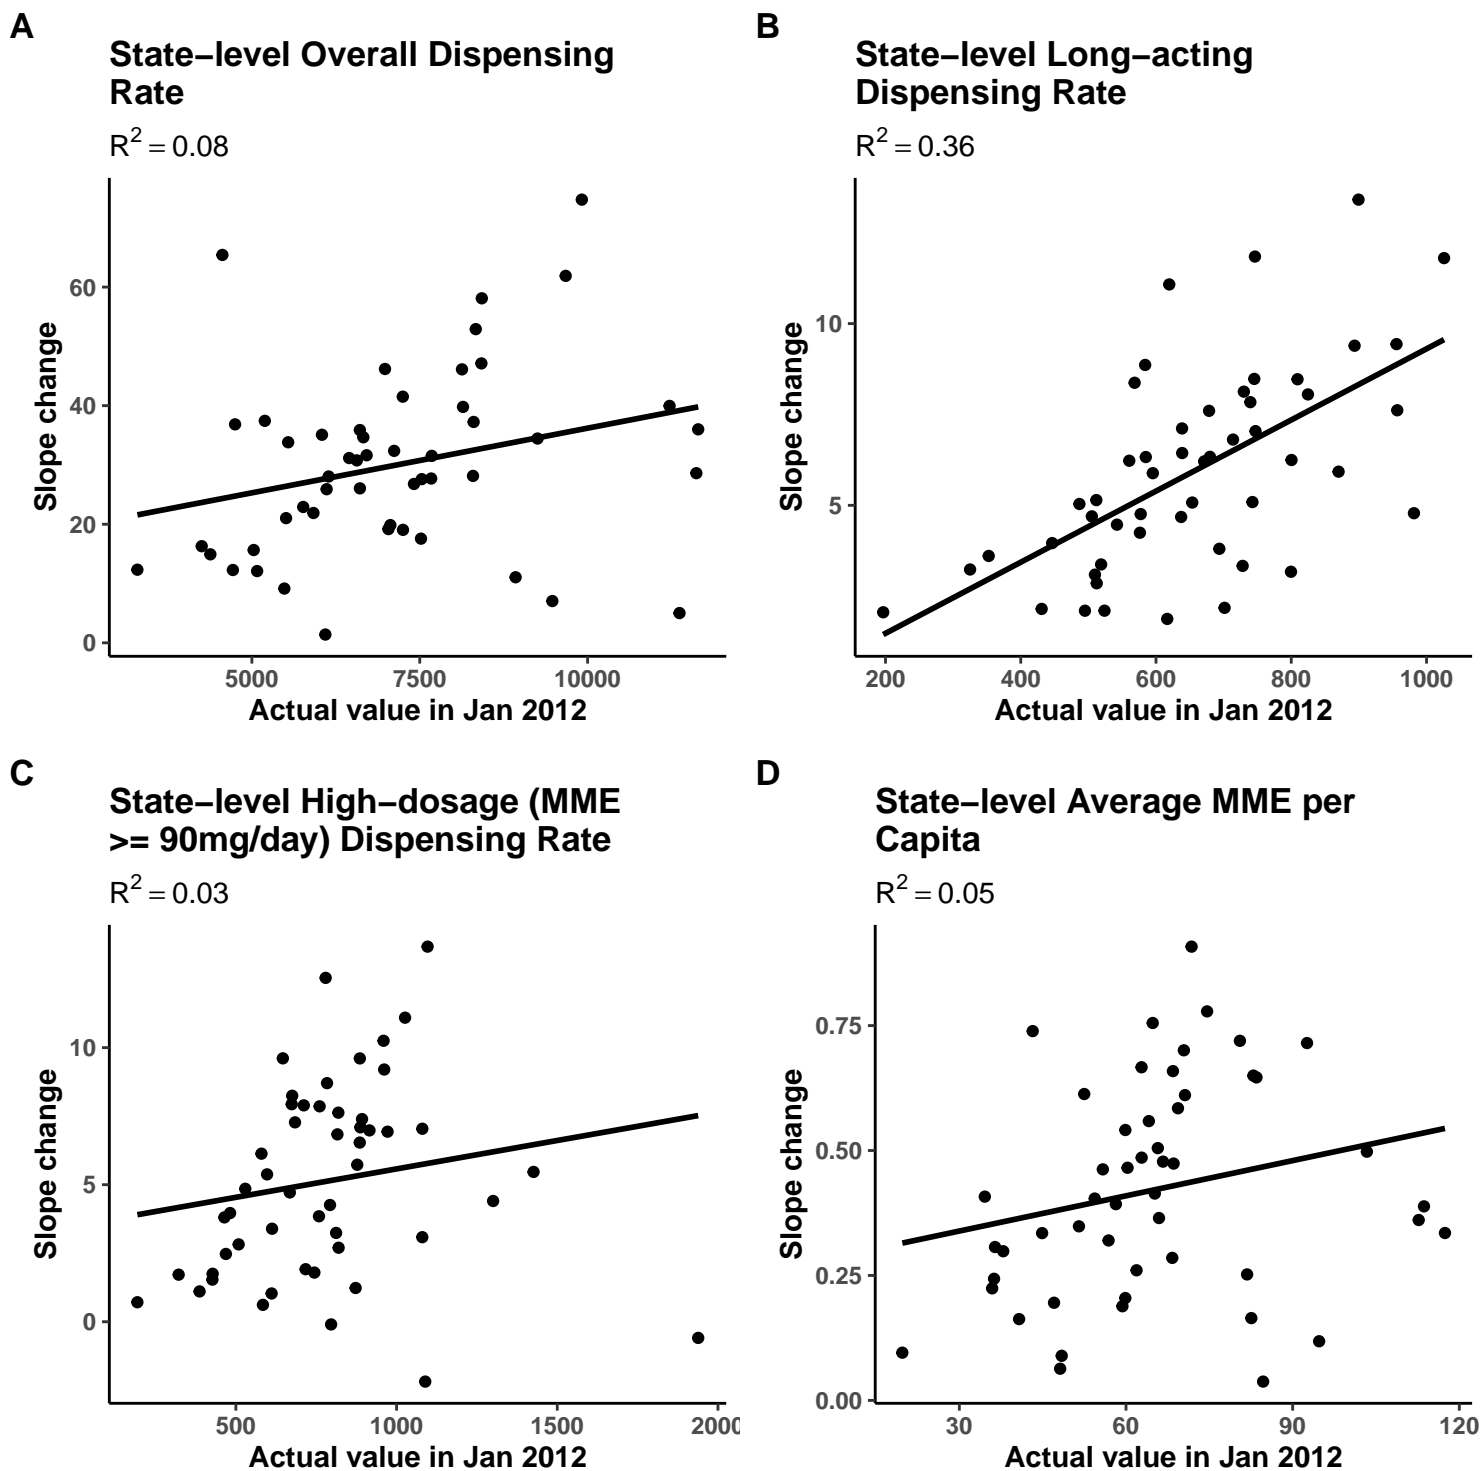

Supplement: jamanetwopen-e2332507-s001.pdf [file jamanetwopen-e2332507-s001.pdf]
