# Supplementary material for: State-to-State Variation in Opioid Dispensing Changes Following the Release of the 2016 CDC Guideline for Prescribing Opioids for Chronic Pain
Source: PubMed Central journal article supplement (PMC10495870; doi:10.1001/jamanetworkopen.2023.32507), 2023-09-11
Supplement: jamanetwopen-e2332507-s002.pdf [file jamanetwopen-e2332507-s002.pdf]

## Data Sharing Statement

Lyu. State-to-State Variation in Opioid Dispensing Changes Following the Release of the 2016 CDC Guideline for Prescribing Opioids for Chronic Pain. *JAMA Netw Open*. Published September 06, 2023. doi:10.1001/jamanetworkopen.2023.32507

### Data

**Data available:** No

### Additional Information

**Explanation for why data not available:** We are unable to publicly share the IQVIA data
